# Supplementary material
Source: PubMed Central journal article supplement (PMC4348676)
Supplement: CJN.03080314_CJN03080314SupplementaryData.pdf [file CJN.03080314_CJN03080314SupplementaryData.pdf]

## **Online supplementary material 1**

### **Clinicaltrial.gov searched June 28, 2014**

<https://clinicaltrials.gov/>

Keyword used: "hyperfiltration"

| <u>Study number</u> | <u>GH cutoff</u>              | <u>Method</u>        | <u>Context</u> | <u>Status</u> |
|---------------------|-------------------------------|----------------------|----------------|---------------|
| Study 1             | 130 ml/min                    | creatinine clearance | intensive care | unknown       |
| Study 2             | 130 ml/min                    | creatinine clearance | obesity        | unknown       |
| Study 3             | 130 ml/min                    | inulin clearance     | obesity        | terminated    |
| Study 4             | 140 ml/min/1.73m <sup>2</sup> | Cr-EDTA              | SCD            | active        |
| Study 5             | 135 ml/min/1.73m <sup>2</sup> | inulin               | diabetes       | completed     |
| Study 6             |                               | inulin               | diabetes       | completed     |
| Study 7             |                               | creatinine clearance | healthy        | recruiting    |
| Study 8             |                               |                      | obesity        | active        |
| Study 9             |                               |                      | SCD            | unknown       |
| Study 10            |                               |                      | obesity        | completed     |
| Study 11            |                               |                      | kidney donor   | completed     |
| Study 12            |                               |                      | kidney donor   | unknown       |
| Study 13            |                               |                      | SCD            | terminated    |
| Study 14            |                               |                      | diabetes       | completed     |
| Study 15            |                               |                      | prematurity    | active        |
| Study 16            |                               |                      | diabetes       | completed     |
| Study 17            |                               |                      | obesity        | recruiting    |

### **ISRCTN searched June 28, 2014**

<http://www.isrctn.org/>

Keyword used: "hyperfiltration"

| <u>Study number</u> | <u>GH cutoff</u> | <u>Method</u> | <u>Context</u> | <u>Status</u> |
|---------------------|------------------|---------------|----------------|---------------|
| Study 1             |                  | iohexol       | diabetes       | unknown       |

### **EU clinical trial registration searched June 28, 2014**

<https://www.clinicaltrialsregister.eu/ctr-search/search>

Keyword used: "hyperfiltration"

| <u>Study number</u> | <u>GH cutoff</u>               | <u>Method</u> | <u>Context</u> | <u>Status</u> |
|---------------------|--------------------------------|---------------|----------------|---------------|
| Study 1             |                                |               | GSD            | ongoing       |
| Study 2             |                                |               | GSD            | ongoing       |
| Study 3             | 140 ml/min/1.73 m <sup>2</sup> | MDRD          | SCD            | ongoing       |

### **Japan Clinical Trial Registry searched June 28, 2014**

[https://dbcentre3.jmacct.med.or.jp/jmactr/Default\\_Eng.aspx](https://dbcentre3.jmacct.med.or.jp/jmactr/Default_Eng.aspx)

Keyword used: "hyperfiltration"

| <u>Study number</u> | <u>GH cutoff</u> | <u>Method</u> | <u>Context</u> | <u>Status</u> |
|---------------------|------------------|---------------|----------------|---------------|
| No studies          |                  |               |                |               |

<http://www.umin.ac.jp/ctr/>

Keyword used: "hyperfiltration"

| <u>Study number</u> | <u>GH cutoff</u> | <u>Method</u> | <u>Context</u> | <u>Status</u> |
|---------------------|------------------|---------------|----------------|---------------|
| No studies          |                  |               |                |               |

## Legends

Cr-EDTA: ethylenediaminetetraacetic acid; EU: European Union; GH: glomerular hyperfiltration; MDRD: modification of diet in renal disease (formula); SCD: sickle cell disease; ISRCTN: International Standard Randomised Controlled Trial Number Register.

## **Online supplementary material 2**

### **Methods**

Protocol and registration: the protocol has been registered with the PROSPERO database of prospectively registered systematic reviews in health and social care (14).

Data source: we performed a systematic review of the literature from November 2012 to May 2014 using the following databases: Medline (1951 to May 2014) (using Pubmed to access the Medline database), Embase (1980 to May 2014), CINAHL (1981 to May 2014). Searches were conducted from the earliest date of titles or abstracts available for each database to the latest titles or abstracts available as of May, 25, 2014. Citations in Medline before 1950, retrieved through Medline were also screened. The search was conducted using the keyword “hyperfiltration” (Medline and Cinahl) and “glomerular hyperfiltration” (Embase). Research strategy can be found in the online supplementary material 3. Further studies were located through citation searches of major papers and by checking the reference lists in primary and review articles retrieved from the database searches. Finally, we searched the complete personal bibliography in Pubmed and Medline of authors with 3 or more included papers for additional relevant studies. There were no time, language or type of study limits used in any primary database search. Reporting of this systematic review was done according to the 2009 PRISMA statement for Reporting Systematic Reviews and Meta-Analyses of Studies That Evaluate Health Care Interventions, which is included in the online supplementary material 4. All included papers are available upon request to the corresponding author. All included papers can be found in the online supplementary material 6 (bibliographic findings) and 5 (summary of findings).

Study selection: we included studies assessing GFR evaluation in humans, with no restriction on the evaluation methods, age of patients, or disease area. As for study type, human clinical and epidemiological studies were included, and animal or cellular studies were all excluded. As for study design, case reports, narrative or systematic reviews, meta-analysis, comments, abstracts and conference proceedings were excluded. All other study designs (RCT, quasi RCT, before-after trials, cross-over trials; prospective/retrospective cohort studies, case series, uncontrolled longitudinal studies; case-control studies, nested case-control studies, cross-sectional studies) were included. Two of the authors (FC, HC) reviewed the abstracts (Endnote X7, Thompson Reuter) and then the full text of the article. Duplicate between databases were removed using the deduplicate tool in Endnote. All articles with a GH threshold were automatically recorded. Retrieved articles with no GH threshold but exploring the effect of GFR level against another outcome of interest such as blood pressure, proteinuria/micro-albuminuria/stroke/death were also recorded. Where disagreement continued after discussion between the two reviewers, a final decision was reached by open discussion.

Data collection: for each included study, the following items were extracted and recorded in duplicate by 2 independent reviewers (FC and HC) on a pre-specified excel sheet, according to the Cochrane Methods Working Group on Systematic Reviews of Screening and Diagnostic Tests, after a pilot test of 50 study inclusion. In case of discordance, the article was reviewed by FC and HC and items re-recorded together. The following data were recorded from each study: - first author; - publication date; - journal name, journal field of research (diabetology, nephrology or other); - study design (group 1: interventional studies: randomized controlled trials, quasi randomized controlled trials, before-after trials, cross-over trials; group 2: observational studies: prospective/retrospective cohort studies, case series, uncontrolled longitudinal studies, case-control studies, nested case-control studies, case-cohort studies, cross-sectional studies); - participants age range (pediatrics:  $\leq$  18 years; adult:  $>$  18 years); - diagnosis (group 1: DM type I and II/metabolic syndrome/obesity; group 2: renal reserve/protein loading test; group 3: other (SCD, glycogen storage disease (GSD),

HTN, pregnancy and others)); - GFR evaluation method; - use or not of a threshold value to define GH; and use or not of a study group or a literature reference to define the value of the used threshold.

Time periods (before 1994, 1995-2005 and after 2005) were defined arbitrarily by the authors (FC and HC). Methods for GFR evaluation were regrouped as follow: group 1: inulin clearance; group 2: isotopes clearances (Cr-EDTA, Tc-DTPA), iohexol clearance, radioactive and nonradioactive iothalamate clearance, sodium thiosulfate clearance; group 3: creatinine clearance; group 4: formulas (Cockcroft-Gault, CKD-Epi, Japanese creatinine-based, Cystatin C based, MDRD, Schwartz). If isotopic or inulin clearances were compared to formulas in the same study, we only recorded results according to the isotopic or inulin clearances measurements.

Age range and/or mean age  $\pm$  SD of study participants refers to the reported age range and/or mean age of the participants of the study group, not the control group. When several participants study groups were reported, we recorded the overall age range, encompassing all groups. In case of several groups with different mean age, we recorded the group with the oldest reported mean age. In cohort study, we reported the recorded the age range or mean age, at the time of the first GFR measurement. Mean age was rounded to the unit (year).

We reported the number of participants at the time of randomisation, when the information was available, not including the number of controls. In cohort studies, we reported the number of participants at the time of the first GFR measurement. Information was also searched in the online supplementary material when available.

Statistics: characteristics of the studies were described by percentages and were compared across publication time period using Chi-squared tests or Fisher exact tests. Association between the characteristics of studies and the use of thresholds were assessed using a mixed-effect logistic regression model. A random effect on the intercept was introduced in the model to account for the first author, because one author may publish several papers and an author may probably follow a similar approach in its various studies. Factors associated with the threshold values were also explored, by using a linear model. This analysis was conducted on the sub-group of studies reporting a single threshold value expressed in ml/min/1.73m<sup>2</sup>. As few authors had two more publications in this sub-group, random effects were not introduced in the linear model. A meta-regression analysis was conducted to test the hypothesis that the proportion of participants classified as hyperfiltering depends on the chosen threshold to define GH in each particular study. The logit of the proportion of GH patients was modelled as a linear function of the threshold value and each study was allocated a weight determined by the sample size (15). The I-squared statistic was used a measure of the heterogeneity in the reported proportions of GH patients. A value of I-squared higher than 75% indicates a high heterogeneity (16). All analyses were conducted with S-plus for windows 8.0 (Insightful Corp., Seattle, WA), STATA/IC 10.1 for Windows (StataCorp 2007. *Stata Statistical Software: Release 10*. College Station, TX: StataCorp LP), and Comprehensive Meta-Analysis 2 (Biostat, Engelwood, NJ,). Inter-rater concordance was evaluated using the kappa-concordance test. Significance was set up at P<0.05.

### **Online supplementary material 3**

#### **Databases search strategy (as of May, 25 2014)**

#### **Pubmed database “hyperfiltration”, free text:**

|          |                  |              |
|----------|------------------|--------------|
| SEARCH#1 | hyperfiltration: | 1667 results |
|----------|------------------|--------------|

**Embase database “hyperfiltration”:**

SEARCH #1 “glomerular hyperfiltration”: 883 results

**Cinahl database “hyperfiltration”:**

SEARCH TX hyperfiltration: 105 results

#### Online supplementary material 4

| Section/topic             | # | Checklist item                                                                                                                                                                                                                                                                                              | Reported on page #              |
|---------------------------|---|-------------------------------------------------------------------------------------------------------------------------------------------------------------------------------------------------------------------------------------------------------------------------------------------------------------|---------------------------------|
| <b>TITLE</b>              |   |                                                                                                                                                                                                                                                                                                             |                                 |
| Title                     | 1 | Identify the report as a systematic review, meta-analysis, or both.                                                                                                                                                                                                                                         | 1                               |
| <b>ABSTRACT</b>           |   |                                                                                                                                                                                                                                                                                                             |                                 |
| Structured summary        | 2 | Provide a structured summary including, as applicable: background; objectives; data sources; study eligibility criteria, participants, and interventions; study appraisal and synthesis methods; results; limitations; conclusions and implications of key findings; systematic review registration number. | 3-4                             |
| <b>INTRODUCTION</b>       |   |                                                                                                                                                                                                                                                                                                             |                                 |
| Rationale                 | 3 | Describe the rationale for the review in the context of what is already known.                                                                                                                                                                                                                              | 6                               |
| Objectives                | 4 | Provide an explicit statement of questions being addressed with reference to participants, interventions, comparisons, outcomes, and study design (PICOS).                                                                                                                                                  | 6-7 and suppl material online 2 |
| <b>METHODS</b>            |   |                                                                                                                                                                                                                                                                                                             |                                 |
| Protocol and registration | 5 | Indicate if a review protocol exists, if and where it can be accessed (e.g., Web address), and, if available, provide registration information including registration number.                                                                                                                               | 6                               |
| Eligibility criteria      | 6 | Specify study characteristics (e.g., PICOS, length of follow-up) and report characteristics (e.g., years considered, language, publication status) used as criteria for eligibility, giving rationale.                                                                                                      | 7 and suppl material online 2   |
| Information sources       | 7 | Describe all information sources (e.g., databases with dates of coverage, contact with study authors to identify additional studies) in the search and date last searched.                                                                                                                                  | 6-7 and suppl material online 2 |
| Search                    | 8 | Present full electronic search strategy for at least one database, including any limits used, such that it could be repeated.                                                                                                                                                                               | 7 and suppl.                    |

|                                    |    |                                                                                                                                                                                                                        |                                 |
|------------------------------------|----|------------------------------------------------------------------------------------------------------------------------------------------------------------------------------------------------------------------------|---------------------------------|
|                                    |    |                                                                                                                                                                                                                        | material 2                      |
| Study selection                    | 9  | State the process for selecting studies (i.e., screening, eligibility, included in systematic review, and, if applicable, included in the meta-analysis).                                                              | 7 and suppl material online 2   |
| Data collection process            | 10 | Describe method of data extraction from reports (e.g., piloted forms, independently, in duplicate) and any processes for obtaining and confirming data from investigators.                                             | 7 and suppl material online 2   |
| Data items                         | 11 | List and define all variables for which data were sought (e.g., PICOS, funding sources) and any assumptions and simplifications made.                                                                                  | 7 and suppl material online 2   |
| Risk of bias in individual studies | 12 | Describe methods used for assessing risk of bias of individual studies (including specification of whether this was done at the study or outcome level), and how this information is to be used in any data synthesis. | N/A                             |
| Summary measures                   | 13 | State the principal summary measures (e.g., risk ratio, difference in means).                                                                                                                                          | 7-8 and suppl material online 2 |
| Synthesis of results               | 14 | Describe the methods of handling data and combining results of studies, if done, including measures of consistency (e.g., $I^2$ ) for each meta-analysis.                                                              | 8                               |

Page 1 of 2

| Section/topic               | #  | Checklist item                                                                                                                                                  | Reported on page # |
|-----------------------------|----|-----------------------------------------------------------------------------------------------------------------------------------------------------------------|--------------------|
| Risk of bias across studies | 15 | Specify any assessment of risk of bias that may affect the cumulative evidence (e.g., publication bias, selective reporting within studies).                    | N/A                |
| Additional analyses         | 16 | Describe methods of additional analyses (e.g., sensitivity or subgroup analyses, meta-regression), if done, indicating which were pre-specified.                | 8 (pre-specified)  |
| <b>RESULTS</b>              |    |                                                                                                                                                                 |                    |
| Study selection             | 17 | Give numbers of studies screened, assessed for eligibility, and included in the review, with reasons for exclusions at each stage, ideally with a flow diagram. | Figure 1           |
| Study characteristics       | 18 | For each study, present characteristics for which data were extracted (e.g., study size, PICOS, follow-up period) and provide the citations.                    | Suppl. material 5- |



|                               |    |                                                                                                                                                                                                          |       |
|-------------------------------|----|----------------------------------------------------------------------------------------------------------------------------------------------------------------------------------------------------------|-------|
|                               |    |                                                                                                                                                                                                          | 6     |
| Risk of bias within studies   | 19 | Present data on risk of bias of each study and, if available, any outcome level assessment (see item 12).                                                                                                | N/A   |
| Results of individual studies | 20 | For all outcomes considered (benefits or harms), present, for each study: (a) simple summary data for each intervention group (b) effect estimates and confidence intervals, ideally with a forest plot. | N/A   |
| Synthesis of results          | 21 | Present results of each meta-analysis done, including confidence intervals and measures of consistency.                                                                                                  | N/A   |
| Risk of bias across studies   | 22 | Present results of any assessment of risk of bias across studies (see Item 15).                                                                                                                          | N/A   |
| Additional analysis           | 23 | Give results of additional analyses, if done (e.g., sensitivity or subgroup analyses, meta-regression [see Item 16]).                                                                                    | 10    |
| <b>DISCUSSION</b>             |    |                                                                                                                                                                                                          |       |
| Summary of evidence           | 24 | Summarize the main findings including the strength of evidence for each main outcome; consider their relevance to key groups (e.g., healthcare providers, users, and policy makers).                     | 11-15 |
| Limitations                   | 25 | Discuss limitations at study and outcome level (e.g., risk of bias), and at review-level (e.g., incomplete retrieval of identified research, reporting bias).                                            | 14-15 |
| Conclusions                   | 26 | Provide a general interpretation of the results in the context of other evidence, and implications for future research.                                                                                  | 14    |
| <b>FUNDING</b>                |    |                                                                                                                                                                                                          |       |
| Funding                       | 27 | Describe sources of funding for the systematic review and other support (e.g., supply of data); role of funders for the systematic review.                                                               | 20    |

From: Moher D, Liberati A, Tetzlaff J, Altman DG, The PRISMA Group (2009). Preferred Reporting Items for Systematic Reviews and Meta-Analyses: The PRISMA Statement. PLoS Med 6(6): e1000097. doi:10.1371/journal.pmed1000097

For more information, visit: [www.prisma-statement.org](http://www.prisma-statement.org).

## Online supplementary material 5

### Main findings of included studies (in alphabetical order)

| <b>First Author</b> | <b>Journal</b>    | <b>Publication Year</b> | <b>Study Type</b>    | <b>Total Subjects</b> | <b>Subject Age</b> | <b>Age range</b> | <b>Mean Age (SD)</b> |
|---------------------|-------------------|-------------------------|----------------------|-----------------------|--------------------|------------------|----------------------|
| Abouchacra          | Nephrology field  | 2013                    | Interventional study | 220                   | Adults             |                  | 35±10                |
| Agaba               | Other field       | 2004                    | Observational study  | 90                    | Adults             |                  | 51±8                 |
| Agarwal             | Other field       | 2005                    | Observational study  | 50                    | Adults             | 35-60            |                      |
| Aloni               | Other field       | 2014                    | Observational study  | 65                    | Pediatrics         |                  | 7±3                  |
| Alvarez             | Other field       | 2012                    | Interventional study | 193                   | Pediatrics         | 1.0-2.0          | 1.1±0.2              |
| Amin                | Nephrology field  | 2005                    | Observational study  | 308                   | Pediatrics         | 0.5-15.0         |                      |
| Amin                | Other field       | 2012                    | Observational study  | 30                    | Adults             |                  | 40±9                 |
| Apakkan Aksun       | Diabetology field | 2003                    | Observational study  | 68                    | Adults             | 50-66            |                      |
| Arlet               | Nephrology field  | 2012                    | Observational study  | 64                    | Mixte              | 18-68            |                      |
| Arnello             | Other field       | 1999                    | Observational study  | 180                   | Pediatrics         |                  |                      |
| Arutiunov           | Other field       | 2009                    | Observational study  | 2230                  | Adults             |                  | 52±10                |
| Askenazi            | Nephrology field  | 2006                    | Observational study  | 29                    | Pediatrics         |                  | 10±7                 |
| Attila              | Other field       | 1998                    | Observational study  | 18                    | Adults             | 28-42            |                      |
| Aygun               | Nephrology field  | 2011                    | Observational study  | 85                    | Pediatrics         | 1.0-18           | 10±5                 |
| Aygun               | Other field       | 2013                    | Observational study  | 23                    | Pediatrics         | 3.0-14           | 7±4                  |
| Azevedo             | Diabetology field | 1991                    | Observational study  | 21                    | Adults             |                  | 30±5                 |
| Azevedo             | Diabetology field | 1994                    | Observational study  | 22                    | Adults             |                  | 35 ± 4               |
| Azevedo             | Diabetology field | 1997                    | Observational study  | 11                    | Adults             | 26-40            | 34±5                 |
| Azevedo             | Diabetology field | 1995                    | Interventional study | 22                    | Adults             |                  | 35±5                 |
| Azevedo             | Diabetology field | 1990                    | Observational study  | 17                    | Adults             | 22-43            | 31±6                 |
| Azevedo             | Other field       | 1990                    | Interventional study | 17                    | Adults             | 22-43            | 31±6                 |
| Bacci               | Diabetology field | 2000                    | Interventional study | 20                    | Adults             |                  | 29±5                 |
| Bach                | Nephrology field  | 1994                    | Interventional study | 9                     | Adults             | 25-51            |                      |
| Baker               | Nephrology field  | 1989                    | Observational study  | 14                    | Mixte              | 1.0-33           |                      |
| Banerjee            | Other field       | 2005                    | Observational study  | 100                   | Adults             |                  |                      |
| Bankir              | Other field       | 2004                    | Observational study  | 25                    | Adults             |                  | 41±2                 |
| Barai               | Nephrology field  | 2008                    | Observational study  | 109                   | Adults             | 19-71            |                      |
| Barba               | Nephrology field  | 1996                    | Interventional study | 47                    | Adults             | 27-57            |                      |
| Beasly              | Other field       | 2012                    | Observational study  | 2419                  | Adults             | 50-79            |                      |

|                |                   |      |                      |     |            |          |        |
|----------------|-------------------|------|----------------------|-----|------------|----------|--------|
| Becker-Cohen   | Nephrology field  | 2005 | Observational study  | 161 | Mixte      | 1.0-81   |        |
| Belsha         | Nephrology field  | 1998 | Observational study  | 62  | Pediatrics | 10.0-18  |        |
| Berg           | Diabetology field | 1998 | Observational study  | 36  | Mixte      | 13-25    |        |
| Bergamaschi    | Nephrology field  | 1990 | Interventional study | 9   | Mixte      | 17-57    |        |
| Bjorck         | Nephrology field  | 1990 | Interventional study | 10  | Adults     |          | 25±4   |
| Bjornstad      | Other field       | 2014 | Observational study  | 616 | Adults     | 19-56    | 37 ± 9 |
| Bjornstad      | Diabetology field | 2014 | Interventional study | 75  | Adults     |          | 15±2   |
| Blankestijn    | Diabetology field | 1993 | Observational study  | 44  | Adults     |          | 36±11  |
| Bodas          | Nephrology field  | 2013 | Observational study  | 48  | Pediatrics | 3.0-17.0 |        |
| Boehler        | Nephrology field  | 1992 | Interventional study | 13  | Adults     | 20-39    |        |
| Boehler        | Other field       | 1993 | Interventional study | 13  | Adults     |          |        |
| Boertien       | Diabetology field | 2012 | Observational study  | 979 | Adults     | 58-75    |        |
| Bognetti       | Diabetology field | 1993 | Observational study  | 19  | Mixte      |          | 16±4   |
| Bolarinwa      | Nephrology field  | 2012 | Observational study  | 72  | Mixte      | 15-60    |        |
| Bouhanick      | Diabetology field | 1999 | Observational study  | 76  | Pediatrics |          | 16±3   |
| Bouhanick      | Diabetology field | 1995 | Observational study  | 110 | Adults     | 17-65    |        |
| Bruce          | Diabetology field | 1994 | Observational study  | 15  | Adults     |          | 32±5   |
| Bulum          | Other field       | 2013 | Observational study  | 313 | Mixte      | 18-65    |        |
| Cachat         | Nephrology field  | 2012 | Observational study  | 146 | Mixte      | 5.0-21   |        |
| Caramori       | Diabetology field | 2003 | Observational study  | 105 | Adults     |          | 36±8   |
| Caramori       | Diabetology field | 1999 | Observational study  | 33  | Adults     |          | 32±7   |
| Carr           | Other field       | 1990 | Observational study  | 52  | Adults     | 20-72    |        |
| Carvalho-Braga | Diabetology field | 1991 | Observational study  | 30  | Adults     |          | 29±10  |
| Catena         | Nephrology field  | 2007 | Observational study  | 56  | Adults     |          | 54±12  |
| Chagnac        | Nephrology field  | 1989 | Interventional study | 12  | Adults     | 24-40    |        |
| Chagnac        | Nephrology field  | 2000 | Observational study  | 21  | Adults     | 23-46    |        |
| Chagnac        | Nephrology field  | 2008 | Observational study  | 12  | Adults     |          | 37±9   |
| Chagnac        | Nephrology field  | 2003 | Interventional study | 8   | Adults     |          | 36±2   |
| Chaiken        | Diabetology field | 1998 | Observational study  | 194 | Adults     |          | 59     |
| Chandar        | Nephrology field  | 2007 | Observational study  | 146 | Mixte      | 5.0-19   |        |
| Cherney        | Diabetology field | 2011 | Observational study  | 18  | Mixte      |          | 17±3   |
| Cherney        | Diabetology field | 2008 | Interventional study | 21  | Adults     |          | 20±1   |
| Cherney        | Diabetology field | 2010 | Interventional study | 24  | Mixte      |          | 20±3   |
| Cherney        | Diabetology field | 2010 | Interventional study | 38  | Mixte      |          | 22±5   |
| Cherney        | Nephrology field  | 2012 | Interventional study | 37  | Mixte      |          | 23±5   |

|                |                   |      |                      |     |            |          |          |
|----------------|-------------------|------|----------------------|-----|------------|----------|----------|
| Cherney        | Diabetology field | 2010 | Interventional study | 32  | Mixte      |          | 18±3     |
| Cherney        | Other field       | 2010 | Interventional study | 66  | Mixte      |          |          |
| Cherney        | Nephrology field  | 2005 | Interventional study | 22  | Pediatrics |          | 15±2     |
| Cherney        | Other field       | 2014 | Interventional study | 40  | Mixte      |          | 25±7     |
| Cherney        | Diabetology field | 2009 | Interventional study | 20  | Adults     |          | 40±4     |
| Cherney        | Diabetology field | 2013 | Interventional study | 35  | Adults     |          | 23±1     |
| Cherney        | Diabetology field | 2013 | Interventional study | 27  | Adults     |          | 26±2     |
| Cherney        | Nephrology field  | 2014 | Interventional study | 41  | Adults     |          | 23±1     |
| Cherney        | Diabetology field | 2010 | Interventional study | 10  | Adults     |          | 43±4     |
| Chiarelli      | Nephrology field  | 1995 | Observational study  | 23  | Mixte      | 9.0-19.0 | 15.6     |
| Chiarelli      | Diabetology field | 2000 | Observational study  | 30  | Mixte      |          | 19±4     |
| Chowta         | Nephrology field  | 2010 | Observational study  | 168 | Adults     |          | 57±1     |
| Christiansen   | Other field       | 1998 | Observational study  | 27  | Adults     |          | 30±7     |
| Ciavarella     | Diabetology field | 1988 | Observational study  | 104 | Mixte      | 16-53    | 32±8     |
| Claris-Appiani | Nephrology field  | 1990 | Interventional study | 7   | Mixte      | 17-25    |          |
| Claris-Appiani | Nephrology field  | 1998 | Interventional study | 7   | Adults     | 21-25    |          |
| Claris-Appiani | Nephrology field  | 1988 | Interventional study | 5   | Adults     | 27-56    |          |
| Claris-Appiani | Nephrology field  | 1988 | Interventional study | 15  | Mixte      | 17-26    |          |
| Claris-Appiani | Nephrology field  | 1999 | Interventional study | 7   | Adults     | 22-25    |          |
| Claus          | Other field       | 2013 | Observational study  | 128 | Adults     | 49-68    |          |
| Coppo          | Nephrology field  | 1993 | Interventional study | 28  | Pediatrics | 3.0-17   |          |
| Cotroneo       | Nephrology field  | 1998 | Observational study  | 177 | Adults     |          | 32 ± 9   |
| Cottiero       | Nephrology field  | 1995 | Observational study  | 25  | Mixte      | 9.0-60   |          |
| Dahl-Jorgensen | Other field       | 1986 | Interventional study | 45  | Adults     | 18-42    |          |
| Dahlquist      | Nephrology field  | 2001 | Observational study  | 60  | Adults     |          | 34.5±2.8 |
| Day            | Other field       | 2012 | Observational study  | 424 | Mixte      | 17-80    |          |
| De Carvalho    | Other field       | 2012 | Observational study  | 74  | Adults     |          | 64±7     |
| De Faria       | Diabetology field | 1997 | Interventional study | 10  | Adults     | 25-35    | 30±3     |
| De Paula       | Other field       | 2013 | Observational study  | 15  | Pediatrics |          | 11±5     |
| De Santo       | Other field       | 1992 | Interventional study | 8   | Adults     |          | 55 ± 5   |
| De Santo       | Nephrology field  | 1992 | Interventional study | 10  | Adults     | 20-35    |          |
| De Santo       | Nephrology field  | 1992 | Interventional study | 8   | Adults     | 23-50    |          |
| De Santo       | Nephrology field  | 1993 | Interventional study | 8   | Adults     | 20-30    |          |
| De Santo       | Nephrology field  | 1994 | Interventional study | 8   | Adults     | 20-30    | 26       |
| De Santo       | Diabetology field | 1997 | Interventional study | 10  | Adults     |          | 26±3     |

|               |                   |      |                      |     |            |           |         |
|---------------|-------------------|------|----------------------|-----|------------|-----------|---------|
| Delles        | Nephrology field  | 2003 | Interventional study | 58  | Adults     |           | 51±8    |
| Dell'Omo      | Nephrology field  | 2002 | Observational study  | 186 | Adults     |           | 51±12   |
| Dengel        | Nephrology field  | 1996 | Interventional study | 10  | Adults     |           | 68±6    |
| Dhaene        | Nephrology field  | 1987 | Interventional study | 6   | Adults     | 24-31     |         |
| Dimitrakov    | Other field       | 1993 | Observational study  | 25  | Mixte      | 15-56     |         |
| Ditzel        | Diabetology field | 1984 | Observational study  | 16  | Mixte      | 11.0-34.0 |         |
| Dmitrova      | Other field       | 2002 | Interventional study | 114 | Adults     | 31-72     |         |
| Drummond      | Diabetology field | 1989 | Interventional study | 18  | Mixte      | 11.0-19.0 |         |
| Drummond      | Diabetology field | 2002 | Observational study  | 243 | Mixte      | 10.0-40.0 | 17±6    |
| Du Cailar     | Nephrology field  | 1991 | Observational study  | 52  | Adults     |           | 34±2    |
| Ducic         | Other field       | 1989 | Observational study  | 61  | Mixte      | 2.5-19.0  |         |
| Dullaart      | Other field       | 1992 | Interventional study | 7   | Adults     | 25-58     |         |
| Dura          | Diabetology field | 1992 | Observational study  | 19  | Pediatrics | 7.0-15.0  |         |
| Eisenhauer    | Other field       | 1990 | Interventional study | 19  | Adults     | 21-50     |         |
| Ekberg        | Other field       | 1990 | Observational study  | 120 | Adults     | 20-40     |         |
| Ekberg        | Other field       | 1991 | Observational study  | 76  | Adults     | 20-40     |         |
| Ekberg        | Nephrology field  | 1993 | Observational study  | 96  | Adults     | 20-40     |         |
| Erben         | Other field       | 1988 | Observational study  | 80  | Adults     |           |         |
| Erley         | Nephrology field  | 1992 | Observational study  | 17  | Adults     |           | 27 ± 6  |
| Ezequiel      | Nephrology field  | 2012 | Interventional study | 35  | Adults     | 20-65     |         |
| Felip         | Nephrology field  | 1998 | Interventional study | 21  | Adults     |           | 46±2    |
| Ficociello    | Diabetology field | 2009 | Observational study  | 426 | Mixte      | 15-44     |         |
| Fioretto      | Diabetology field | 1992 | Observational study  | 21  | Adults     | 18-45     |         |
| Fliser        | Nephrology field  | 1993 | Interventional study | 25  | Adults     | 23-82     |         |
| Fontseré      | Nephrology field  | 2006 | Observational study  | 87  | Adults     | 31-69     | 54±9    |
| Fontseré      | Diabetology field | 2008 | Observational study  | 118 | Adults     |           | 57±10   |
| Francischetti | Other field       | 1992 | Interventional study | 10  |            |           |         |
| Frankfurt     | Nephrology field  | 2012 | Observational study  | 107 | Pediatrics | 1.0-3.0   |         |
| Friedman      | Nephrology field  | 2010 | Interventional study | 17  | Adults     |           | 45±10   |
| Friedman      | Nephrology field  | 2014 | Interventional study | 8   | Adults     | 31-58     | 48      |
| Fu            | Diabetology field | 2012 | Observational study  | 112 | Adults     |           | 24±4    |
| Fu            | Diabetology field | 2013 | Observational study  | 88  | Adults     |           | 51±13   |
| Fuster-Lluch  | Other field       | 2008 | Observational study  | 89  | Adults     |           | 66 ± 20 |
| Futrakul      | Other field       | 2005 | Observational study  | 50  | Adults     |           | 46 ± 10 |
| Gerchman      | Diabetology field | 2009 | Observational study  | 144 | Adults     | 34-76     |         |

|                 |                   |      |                      |      |            |            |         |
|-----------------|-------------------|------|----------------------|------|------------|------------|---------|
| Gorsnostaeva    | Other field       | 2010 | Observational study  | 109  | Pediatrics | 29-72      |         |
| Gragnoli        | Nephrology field  | 1993 | Observational study  | 163  | Adults     | 42-70      | 59 ± 10 |
| Greene          | Nephrology field  | 1987 | Interventional study | 10   | Adults     | 23-47      |         |
| Groop           | Diabetology field | 2013 | Observational study  | 4201 | Adults     |            | 44±8    |
| Guasch          | Nephrology field  | 1997 | Observational study  | 66   | Mixte      | 18-65      |         |
| Guizar          | Nephrology field  | 2001 | Interventional study | 28   | Adults     |            | 43±8    |
| Gumus           | Nephrology field  | 2009 | Observational study  | 500  | Adults     |            | 52±8    |
| Hadj-Aissa      | Nephrology field  | 1992 | Interventional study | 10   | Adults     |            | 28±5    |
| Haneda          | Other field       | 1992 | Observational study  | 23   | Adults     |            |         |
| Hansen          | Other field       | 1992 | Observational study  | 184  | Mixte      | 18-56      |         |
| Hansen          | Diabetology field | 1993 | Interventional study | 16   | Adults     | 19-49      |         |
| Har             | Diabetology field | 2012 | Observational study  | 49   | Adults     |            | 25±3    |
| Harrap          | Nephrology field  | 2000 | Observational study  | 100  | Adults     |            | 22      |
| Harvey          | Diabetology field | 1992 | Observational study  | 31   | Adults     |            | 31 ± 2  |
| Haymann         | Nephrology field  | 2010 | Observational study  | 280  | Mixte      | 16-61      |         |
| Heering         | Nephrology field  | 1994 | Observational study  | 16   | Adults     |            | 48 ± 3  |
| Heering         | Nephrology field  | 1994 | Interventional study | 24   | Adults     |            | 40±3    |
| Helal           | Nephrology field  | 2011 | Observational study  | 108  | Pediatrics | 4.0-14     |         |
| Hellerstein     | Nephrology field  | 2004 | Interventional study | 78   | Mixte      | 5.0-21     |         |
| Hernandez-Marco | Nephrology field  | 2009 | Observational study  | 29   | Mixte      | 4.0-20     |         |
| Herrera         | Nephrology field  | 1988 | Interventional study | 10   | Adults     | 19-28      |         |
| Hiragushi       | Diabetology field | 2001 | Observational study  | 166  | Adults     | 40-79      |         |
| Hjorth          | Other field       | 2011 | Observational study  | 131  | Pediatrics | 1.0-18     |         |
| Hladunewich     | Nephrology field  | 2004 | Observational study  | 22   | Adults     |            | 34±5    |
| Hoang           | Nephrology field  | 2003 | Observational study  | 159  | Mixte      | 18-88      |         |
| Hohenstein      | Nephrology field  | 2008 | Observational study  | 45   | Adults     |            | 60±12   |
| Hou             | Other field       | 2012 | Interventional study | 233  | Adults     | 24-53      | 33±10   |
| Houlihan        | Other field       | 1999 | Observational study  | 21   | Adults     | 24-77      |         |
| Huttunen        | Other field       | 1989 | Observational study  | 32   | Pediatrics | 9.00-17.00 |         |
| Ishida          | Diabetology field | 1991 | Interventional study | 71   | Adults     |            | 42±1    |
| Ishizaka        | Nephrology field  | 2008 | Observational study  | 8054 | Adults     |            | 56 ± 10 |
| Jacobs          | Diabetology field | 1997 | Interventional study | 9    | Adults     | 20-32      |         |
| Jacobs          | Other field       | 1999 | Interventional study | 9    | Adults     | 21-48      | 34.9    |
| Janssen         | Diabetology field | 1997 | Observational study  | 108  | Adults     | 18-63      |         |
| Javor           | Diabetology field | 2004 | Observational study  | 25   | Mixte      | 8.0-67     |         |

|            |                   |      |                      |      |            |           |        |
|------------|-------------------|------|----------------------|------|------------|-----------|--------|
| Jenkins    | Diabetology field | 1989 | Interventional study | 8    | Adults     |           | 33±2   |
| Jesudason  | Other field       | 2013 | Interventional study | 45   | Mixte      | 18-75     |        |
| Jin        | Diabetology field | 2006 | Observational study  | 342  | Adults     | 20-59     |        |
| Jones      | Diabetology field | 1991 | Observational study  | 26   | Mixte      | 17-49     |        |
| Jones      | Nephrology field  | 1992 | Interventional study | 16   | Adults     |           | 50±6   |
| Juhl       | Diabetology field | 1997 | Interventional study | 24   | Adults     |           | 31     |
| Juraschek  | Nephrology field  | 2013 | Interventional study | 164  | Adults     |           | 54±11  |
| Kalk       | Diabetology field | 1990 | Observational study  | 127  | Mixte      | 13-36     |        |
| Kalk       | Other field       | 1992 | Observational study  | 39   | Mixte      | 14-32     |        |
| Kandasamy  | Nephrology field  | 2013 | Observational study  | 39   | Pediatrics |           | 0.1    |
| Keller     | Nephrology field  | 1996 | Observational study  | 85   | Adults     | 26-69     |        |
| Khalil     | Diabetology field | 2013 | Interventional study | 21   | Mixte      | 18-41     |        |
| Kimura     | Nephrology field  | 1996 | Interventional study | 6    | Adults     | 32-60     |        |
| Kinebuchi  | Other field       | 2004 | Observational study  | 27   | Adults     |           | 53±13  |
| King       | Other field       | 2011 | Observational study  | 244  | Pediatrics | 2.0-14    | 7±3    |
| Klein      | Other field       | 1995 | Interventional study | 23   | Mixte      | 18-39     |        |
| Koetje     | Other field       | 2011 | Observational study  | 44   | Adults     |           | 30 ± 4 |
| Korpachev  | Other field       | 2009 | Observational study  | 90   | Adults     | 45-70     |        |
| Kotchen    | Nephrology field  | 2000 | Interventional study | 62   | Adults     |           | 48±1   |
| Kralickova | Other field       | 2004 | Observational study  | 26   | Adults     | 44-74     | 61±9   |
| Krikken    | Nephrology field  | 2007 | Interventional study | 95   | Adults     | 22-24     |        |
| Krishna    | Nephrology field  | 1988 | Interventional study | 9    | Adults     | 38-47     |        |
| Kubo       | Nephrology field  | 1999 | Observational study  | 2446 | Adults     | 40-79     |        |
| Kumar      | Other field       | 1996 | Observational study  | 17   | Pediatrics | 2.0-18    |        |
| Laborde    | Nephrology field  | 1990 | Observational study  | 45   | Mixte      | 4.0-20.0  | 13±4   |
| Lafayette  | Nephrology field  | 1998 | Observational study  | 13   | Adults     |           | 34±2   |
| Lafayette  | Nephrology field  | 1999 | Observational study  | 34   | Adults     |           | 34±2   |
| Lalau      | Nephrology field  | 1993 | Interventional study | 11   | Adults     | 27-77     |        |
| Lebovitz   | Diabetology field | 1990 | Observational study  | 71   | Adults     | 46-54     |        |
| Lee        | Nephrology field  | 1993 | Observational study  | 8    | Adults     | 21-68     |        |
| Lee        | Nephrology field  | 1995 | Observational study  | 83   | Mixte      | 11.0-35.0 |        |
| Lee        | Nephrology field  | 1995 | Observational study  | 284  | Adults     | 25-42     |        |
| Lemley     | Nephrology field  | 2000 | Observational study  | 22   | Adults     |           | 40±13  |
| Lemley     | Nephrology field  | 2005 | Observational study  | 48   | Adults     |           | 45±9   |
| Lervang    | Diabetology field | 1988 | Observational study  | 29   | Mixte      | 11.0-39.0 | 24     |

|               |                   |      |                      |      |            |           |         |
|---------------|-------------------|------|----------------------|------|------------|-----------|---------|
| Lervang       | Diabetology field | 1992 | Observational study  | 34   | Pediatrics | 7.0-18.0  | 14      |
| Levitt        | Diabetology field | 1995 | Observational study  | 60   | Adults     |           | 48±2    |
| Levy-Marchal  | Other field       | 1989 | Observational study  | 29   | Pediatrics | 4.00-17.0 |         |
| Linne         | Diabetology field | 1991 | Interventional study | 6    | Mixte      | 18-24     | 22±2    |
| Losito        | Nephrology field  | 1988 | Interventional study | 17   | Adults     |           | 41      |
| Losito        | Other field       | 1988 | Interventional study | 34   | Adults     |           | 46±12   |
| Luaces        | Nephrology field  | 2012 | Observational study  | 61   | Adults     |           | 41 ± 10 |
| Luik          | Diabetology field | 2002 | Observational study  | 24   | Adults     |           | 28±6    |
| Luippold      | Other field       | 2001 | Interventional study | 12   | Adults     | 24-38     | 28±2    |
| Maeda         | Nephrology field  | 2011 | Observational study  | 72   | Adults     | 40-55     |         |
| Magri         | Nephrology field  | 2011 | Observational study  | 313  | Adults     |           | 61 ± 11 |
| Malaki        | Nephrology field  | 2011 | Observational study  | 63   | Mixte      | 1.0-29    |         |
| Mallamaci     | Nephrology field  | 1996 | Observational study  | 14   | Adults     | 30-65     | 47±9    |
| Mammen        | Nephrology field  | 2012 | Observational study  | 126  | Pediatrics |           | 3.0±8.0 |
| Mansy         | Other field       | 1989 | Interventional study | 12   | Adults     | 43-71     |         |
| Manto         | Diabetology field | 1993 | Observational study  | 89   | Adults     |           | 30 ± 10 |
| Marcovecchio  | Other field       | 2010 | Observational study  | 183  | Mixte      |           | 15±4    |
| Marouf        | Other field       | 2006 | Observational study  | 59   | Adults     | 21-33     |         |
| Marre         | Diabetology field | 1992 | Observational study  | 169  | Adults     |           | 66 ± 4  |
| Martens       | Nephrology field  | 2009 | Observational study  | 39   | Mixte      | 1.0-23    |         |
| Marzano       | Other field       | 1998 | Observational study  | 81   | Adults     | 19-60     |         |
| Matteucci     | Diabetology field | 2002 | Observational study  | 79   | Adults     |           | 39±13   |
| Mauer         | Diabetology field | 2002 | Observational study  | 243  | Mixte      | 10.0-40   |         |
| McCarville    | Other field       | 2012 | Observational study  | 203  | Pediatrics | 1.0-2.0   |         |
| McPherson Yee | Nephrology field  | 2011 | Observational study  | 410  | Mixte      | 2.0-21    |         |
| Meeme         | Other field       | 2010 | Observational study  | 40   | Mixte      | 18-85     |         |
| Melis         | Diabetology field | 2005 | Observational study  | 95   | Mixte      | 1.0-42    |         |
| Melsom        | Diabetology field | 2011 | Observational study  | 1560 | Adults     | 50-62     |         |
| Melsom        | Nephrology field  | 2012 | Observational study  | 1506 | Adults     | 50.0-62   |         |
| Miller        | Nephrology field  | 2003 | Interventional study | 20   | Mixte      |           | 14±2    |
| Miltenyi      | Other field       | 1990 | Observational study  | 9    | Pediatrics | 10.0-17   | 12.6    |
| Mimran        | Nephrology field  | 1996 | Observational study  | 38   | Adults     | 21-64     |         |
| Mizuiriri     | Nephrology field  | 1994 | Interventional study | 10   | Adults     |           | 45±13   |
| Mocan         | Diabetology field | 1994 | Observational study  | 59   | Adults     |           | 54 ± 10 |
| Mogensen      | Diabetology field | 1973 | Observational study  | 12   | Mixte      | 17-33     |         |



|              |                   |      |                      |        |            |          |         |
|--------------|-------------------|------|----------------------|--------|------------|----------|---------|
| Mogensen     | Other field       | 1986 | Observational study  | 12     | Adults     |          |         |
| Mogensen     | Diabetology field | 1990 | Observational study  | 53     | Mixte      | 18-49    |         |
| Monami       | Diabetology field | 2009 | Observational study  | 2694   | Adults     | 40-75    |         |
| Monster      | Other field       | 2003 | Observational study  | 7365   | Adults     | 28-75    | 50 ± 13 |
| Montanari    | Other field       | 2012 | Interventional study | 11     | Adults     | 28-44    | 36±2    |
| Montini      | Nephrology field  | 2000 | Interventional study | 5      | Pediatrics | 9.0-14   |         |
| Moran        | Nephrology field  | 2003 | Observational study  | 10     | Adults     |          |         |
| Moriya       | Nephrology field  | 2012 | Observational study  | 30     | Adults     |          | 49±9    |
| Morrone      | Nephrology field  | 2003 | Observational study  | 32     | Adults     |          | 46±3    |
| Mueller      | Nephrology field  | 1999 | Observational study  | 30     | Pediatrics | 4.0-17.0 |         |
| Myers        | Other field       | 1991 | Observational study  | 20     | Adults     |          | 35±2    |
| Nair         | Diabetology field | 1994 | Interventional study | 10     | Adults     | 28-32    |         |
| Nakamura     | Diabetology field | 1991 | Observational study  | 16     | Adults     | 32-64    |         |
| Nakamura     | Other field       | 1990 | Interventional study | 10     | Adults     |          | 49±10   |
| Nakamura     | Other field       | 1989 | Interventional study | 20     | Adults     |          | 49±10   |
| Nakamura     | Diabetology field | 1993 | Interventional study | 6      | Adults     |          | 43±5    |
| Navarro-Diaz | Nephrology field  | 2006 | Interventional study | 61     | Adults     |          | 41±9    |
| Nelson       | Diabetology field | 1999 | Observational study  | 26     | Adults     |          |         |
| Neto         | Nephrology field  | 2009 | Interventional study | 140    | Adults     | 18-60    |         |
| New          | Diabetology field | 1998 | Interventional study | 29     | Adults     | 27-70    | 52 ± 11 |
| Ng           | Other field       | 2014 | Observational study  | 367    | Adults     | 44-57    | 50      |
| Nielsen      | Diabetology field | 2001 | Interventional study | 9      | Adults     |          | 30±7    |
| Nistrup      |                   |      |                      |        |            |          |         |
| holmegaard   | Other field       | 2006 | Observational study  | 22     | Adults     | 36-85    |         |
| Nordgren     | Other field       | 1994 | Observational study  | 55     | Mixte      | 13-21    | 18±2    |
| Norgaard     | Other field       | 1991 | Interventional study | 6      | Adults     | 21-30    |         |
| Novikova     | Other field       | 2012 | Observational study  | 86     | Adults     | 35-69    | 54      |
| Nowack       | Nephrology field  | 1992 | Observational study  | 16     | Adults     | 45-66    |         |
| Nyberg       | Nephrology field  | 1994 | Observational study  | 58     | Pediatrics | 0.5-16   | 8±2     |
| Odutola      | Other field       | 1997 | Observational study  | 84     | Mixte      | 15-46    |         |
| Ohashi       | Other field       | 2001 | Observational study  | 25     | Adults     | 52±10    |         |
| Okada        | Other field       | 2014 | Observational study  | 205382 | Adults     | 40-74    |         |
| Okada        | Nephrology field  | 2012 | Observational study  | 5003   | Adults     | 35-69    |         |
| Okada        | Nephrology field  | 2012 | Observational study  | 99140  | Adults     | 20-89    |         |
| Oterdoom     | Nephrology field  | 2007 | Observational study  | 2902   | Adults     | 28-75    | 48±12   |

|                  |                   |      |                      |         |            |          |        |
|------------------|-------------------|------|----------------------|---------|------------|----------|--------|
| Paiva            | Diabetology field | 2003 | Observational study  | 86      | Adults     |          | 65±7   |
| Palatini         | Nephrology field  | 2006 | Observational study  | 502     | Adults     |          | 37±7   |
| Palatini         | Nephrology field  | 2005 | Observational study  | 976     | Adults     |          | 35±9   |
| Palatini         | Nephrology field  | 2009 | Observational study  | 101     | Adults     |          | 33±9   |
| Palatini         | Nephrology field  | 2012 | Observational study  | 1106    | Adults     |          | 34±8   |
| Palatini         | Nephrology field  | 2013 | Observational study  | 534     | Adults     |          | 34±8   |
| Palmisano        | Diabetology field | 1989 | Observational study  | 72      | Adults     |          | 62 ± 8 |
| Park             | Other field       | 2013 | Observational study  | 34769   | Adults     |          | 47±10  |
| Pecis            | Diabetology field | 1997 | Observational study  | 58      | Adults     | 18-54    |        |
| Pecis            | Diabetology field | 1994 | Interventional study | 15      | Adults     |          | 25±5   |
| Pecly            | Other field       | 2006 | Interventional study | 23      | Adults     |          | 51±3   |
| Pedersen         | Diabetology field | 1991 | Interventional study | 20      | Adults     |          | 46±3   |
| Perelstein       | Other field       | 1990 | Interventional study | 17      | Pediatrics |          | 10±2   |
| Perkins          | Nephrology field  | 2012 | Interventional study | 20      | Pediatrics |          | 15±3   |
| Pham             | Diabetology field | 2012 | Observational study  | 550     | Adults     |          | 58±11  |
| Piepsz           | Other field       | 2006 | Observational study  | unclear | Pediatrics | 2.0-16   |        |
| Pinho-Silveiro   | Diabetology field | 1996 | Observational study  | 64      | Adults     | 43-67    |        |
| Pinto-Sietsman   | Nephrology field  | 2000 | Observational study  | 7728    | Adults     | 28-75    |        |
| Pistrosch        | Diabetology field | 2005 | Interventional study | 19      | Adults     | 49-70    | 58±8   |
| Ponder           | Diabetology field | 1990 | Observational study  | 220     | Pediatrics | 7.0-18.0 |        |
| Prematane        | Diabetology field | 2005 | Observational study  | 662     | Adults     | 40-70    |        |
| Prestidge        | Nephrology field  | 2011 | Observational study  | 63      | Mixte      | 2.0-19   |        |
| Pruijm           | Nephrology field  | 2010 | Observational study  | 363     | Adults     | 37-63    | 45     |
| Quinn            | Other field       | 2011 | Observational study  | 216     | Mixte      | 6.0-75   | 23     |
| Raes             | Nephrology field  | 2007 | Observational study  | 51      | Pediatrics |          | 8±4    |
| Rajic            | Nephrology field  | 2007 | Observational study  | 53      | Adults     |          | 49±13  |
| Regolisti        | Other field       | 1992 | Observational study  | 14      | Adults     | 37-55    |        |
| Reitsma-Bierens  | Nephrology field  | 1992 | Observational study  | 23      | Mixte      | 2.00-22  | 10.9   |
| Ribstein         | Nephrology field  | 1995 | Observational study  | 80      | Adults     | 19-59    |        |
| Ribstein         | Nephrology field  | 2005 | Interventional study | 25      | Adults     | 33-66    | 49±2   |
| Rigalleau        | Nephrology field  | 2007 | Observational study  | 63      | Adults     |          |        |
| Rius             | Nephrology field  | 1995 | Observational study  | 121     | Adults     | 28-70    |        |
| Rodriguez-Iturbe | Other field       | 1985 | Observational study  | 79      | Mixte      | 17-60    |        |
| Rodriguez-Iturbe | Other field       | 1988 | Interventional study | 37      | Mixte      | 18-32    |        |
| Roels            | Other field       | 1994 | Interventional study | 76      | Adults     | 29-56    | 44±8   |

|              |                   |      |                      |     |            |           |        |
|--------------|-------------------|------|----------------------|-----|------------|-----------|--------|
| Rota         | Nephrology field  | 1993 | Observational study  | 22  | Adults     |           |        |
| Rudberg      | Nephrology field  | 1992 | Observational study  | 64  | Mixte      | 12.0-22.0 | 17±0.5 |
| Rudberg      | Nephrology field  | 1997 | Observational study  | 15  | Mixte      | 15.0-23.0 | 18.6   |
| Ruggenti     | Diabetology field | 2003 | Interventional study | 11  | Adults     | 42-72     | 59     |
| Ruggenti     | Diabetology field | 2012 | Observational study  | 600 | Adults     |           | 61±8   |
| Sackmann     | Diabetology field | 1998 | Interventional study | 33  | Adults     |           | 40±4   |
| Sackmann     | Diabetology field | 2000 | Interventional study | 20  | Adults     |           | 45±3   |
| Sauriasari   | Nephrology field  | 2010 | Observational study  | 649 | Mixte      | 18-67     |        |
| Sawacki      | Diabetology field | 1988 | Observational study  | 148 | Adults     |           | 34±12  |
| Schell       | Nephrology field  | 2001 | Observational study  | 23  | Pediatrics | 1.0-16    |        |
| Schlaich     | Nephrology field  | 2008 | Observational study  | 310 | Adults     |           | 49±15  |
| Schmieder    | Nephrology field  | 1994 | Observational study  | 88  | Adults     |           | 42 ± 7 |
| Schmieder    | Nephrology field  | 1997 | Interventional study | 37  | Adults     |           | 26±2   |
| Schmieder    | Other field       | 1990 | Observational study  | 111 | Adults     |           | 47±9   |
| Schmitt      | Nephrology field  | 1998 | Observational study  | 14  | Adults     |           | 27±1   |
| Schmitz      | Diabetology field | 1989 | Interventional study | 15  | Adults     | 51-68     |        |
| Schmitz      | Other field       | 1989 | Observational study  | 18  | Adults     |           | 62±3   |
| Schmitz      | Other field       | 1990 | Observational study  | 38  | Adults     | 55-70     |        |
| Schou        | Other field       | 2007 | Observational study  | 345 | Adults     | 34-92     |        |
| Sebekova     | Other field       | 2009 | Observational study  | 18  | Pediatrics | 5.0-18.0  |        |
| Sechi        | Diabetology field | 2009 | Interventional study | 54  | Adults     |           | 53±12  |
| Selistre     | Nephrology field  | 2012 | Observational study  | 52  | Pediatrics | 1.0-17    | 10 ± 4 |
| Sellers      | Diabetology field | 2009 | Observational study  | 90  | Pediatrics | 10.0-18   |        |
| Semplicini   | Nephrology field  | 2002 | Interventional study | 32  | Adults     | 30-67     | 44     |
| Serri        | Other field       | 1991 | Interventional study | 11  | Adults     | 23-52     |        |
| Signorini    | Other field       | 1991 | Observational study  | 73  | Adults     |           | 60±10  |
| Silva Junior | Other field       | 2012 | Observational study  | 98  | Adults     | 19-67     |        |
| Silveiro     | Diabetology field | 1993 | Observational study  | 71  | Adults     | 32-46     |        |
| Simon        | Nephrology field  | 1998 | Interventional study | 8   | Adults     | 25-45     |        |
| Smoyer       | Other field       | 1991 | Interventional study | 6   | Adults     |           |        |
| Sochett      | Nephrology field  | 2006 | Interventional study | 22  | Pediatrics |           | 15±2   |
| Soldo        | Other field       | 1997 | Observational study  | 190 | Mixte      | 18-84     |        |
| Solerte      | Other field       | 1999 | Interventional study | 40  | Adults     | 25-55     |        |
| Soper        | Nephrology field  | 1998 | Observational study  | 75  | Adults     | 18-42     |        |
| Steinke      | Diabetology field | 2005 | Observational study  | 170 | Mixte      |           | 17±6   |

|                    |                   |      |                      |      |            |         |          |
|--------------------|-------------------|------|----------------------|------|------------|---------|----------|
| Stephenson         | Nephrology field  | 2005 | Interventional study | 12   | Adults     |         | 30±2     |
| Sterner            | Diabetology field | 1997 | Observational study  | 56   | Adults     | 25-67   |          |
| Strzelecka-Lichota | Other field       | 2004 | Observational study  | 31   | Mixte      |         | 13±6     |
| Stuveling          | Nephrology field  | 2003 | Observational study  | 7317 | Adults     |         | 52±13    |
| Taniwaki           | Nephrology field  | 2000 | Observational study  | 85   | Adults     | 30-76   | 58±10    |
| ter Wee            | Nephrology field  | 1987 | Interventional study | 16   | Adults     | 20-51   | 31       |
| Ter Wee            | Other field       | 1990 | Observational study  | 20   | Adults     | 22-72   |          |
| Thomas             | Nephrology field  | 1994 | Interventional study | 8    | Adults     |         |          |
| Thomas             | Nephrology field  | 2004 | Observational study  | 604  | Adults     |         | 65±0.5   |
| Thompson           | Other field       | 2007 | Observational study  | 65   | Adults     | 19-23   |          |
| Thraikill          | Diabetology field | 2007 | Observational study  | 93   | Mixte      |         | 19±6     |
| Tiengo             | Diabetology field | 1992 | Observational study  | 66   | Adults     |         | 52±7     |
| Tietze             | Nephrology field  | 1997 | Interventional study | 14   | Adults     | 23-57   | 44       |
| Toenshoff          | Nephrology field  | 1993 | Interventional study | 10   | Adults     | 22-27   |          |
| Tomaszewski        | Nephrology field  | 2007 | Observational study  | 1572 | Mixte      |         | 18.4±1.3 |
| Torbjornsdotter    | Diabetology field | 2004 | Observational study  | 40   | Mixte      |         | 18±3     |
| Tsai               | Other field       | 2014 | Observational study  | 3743 | Adults     | 32-40   |          |
| Tuttle             | Nephrology field  | 2002 | Interventional study | 12   | Mixte      | 18-44   | 27±7     |
| Tuttle             | Nephrology field  | 1992 | Interventional study | 12   | Adults     |         | 38±14    |
| Uemasu             | Nephrology field  | 1989 | Interventional study | 19   | Adults     | 25-36   |          |
| Uemasu             | Nephrology field  | 1991 | Interventional study | 7    | Adults     | 22-36   |          |
| Unuigbe            | Other field       | 2005 | Observational study  | 90   | Adults     |         | 53 ± 11  |
| Valensi            | Other field       | 1996 | Observational study  | 207  | Adults     |         | 40 ± 13  |
| Vanrenterghem      | Nephrology field  | 1988 | Interventional study | 6    | Adults     | 22-38   |          |
| Vasavda            | Other field       | 2012 | Observational study  | 40   | Adults     |         | 27±9     |
| Vasovic            | Other field       | 2005 | Observational study  | 27   | Adults     |         |          |
| Vedder             | Other field       | 2007 | Observational study  | 71   | Mixte      | 16-73   |          |
| Vedel              | Diabetology field | 1996 | Observational study  | 197  | Adults     |         | 58 ± 6   |
| Veldman            | Diabetology field | 2005 | Observational study  | 92   | Adults     |         | 29±7     |
| Vervoort           | Other field       | 2005 | Observational study  | 54   | Adults     |         | 28±7     |
| Viberti            | Diabetology field | 1989 | Observational study  | 19   | Adults     | 20-46   |          |
| Vora               | Nephrology field  | 1992 | Observational study  | 110  | Adults     |         | 53±10    |
| Ware               | Other field       | 2010 | Observational study  | 176  | Pediatrics | 1.0-2.0 |          |
| Weaver             | Other field       | 2003 | Observational study  | 803  | Mixte      | 18-65   |          |

|                 |                   |      |                      |     |            |          |         |
|-----------------|-------------------|------|----------------------|-----|------------|----------|---------|
| Weaver          | Other field       | 2011 | Observational study  | 712 | Adults     | 24-71    |         |
| Widstam-Attrops | Nephrology field  | 1992 | Observational study  | 110 | Mixte      | 6.0-25   |         |
| Wiesmayr        | Nephrology field  | 2005 | Observational study  | 45  | Pediatrics | 0.5-18.0 |         |
| Wigfall         | Other field       | 2000 | Observational study  | 442 | Mixte      | 2.0-21   |         |
| Williams        | Diabetology field | 2006 | Interventional study | 6   | Adults     | 19-24    |         |
| Wirta           | Nephrology field  | 1996 | Observational study  | 109 | Adults     |          | 56±7    |
| Wiseman         | Nephrology field  | 1984 | Observational study  | 78  | Mixte      | 16-59    |         |
| Wiseman         | Diabetology field | 1985 | Observational study  | 22  | Mixte      | 16-50    | 30±12   |
| Wiseman         | Nephrology field  | 1987 | Observational study  | 34  | Mixte      | 18-61    |         |
| Woitas          | Other field       | 1997 | Interventional study | 12  | Adults     |          | 37±5    |
| Wolfsdorf       | Other field       | 1999 | Observational study  | 11  | Mixte      | 5.0-21   |         |
| Wollesen        | Nephrology field  | 1999 | Observational study  | 80  | Adults     | 41-69    |         |
| Wong            | Other field       | 1993 | Observational study  | 38  | Adults     | 34-70    |         |
| Wong            | Other field       | 1993 | Interventional study | 12  | Adults     | 35-69    |         |
| Wong            | Nephrology field  | 2004 | Observational study  | 18  | Pediatrics |          | 10±6    |
| Wong            | Other field       | 1996 | Interventional study | 7   | Adults     | 42-70    |         |
| Woo             | Other field       | 2005 | Interventional study | 12  | Adults     | 62-83    |         |
| Wu              | Nephrology field  | 2011 | Observational study  | 130 | Adults     |          | 50±13   |
| Wu              | Other field       | 2011 | Observational study  | 576 | Adults     |          | 51 ± 16 |
| Wuerzner        | Nephrology field  | 2010 | Observational study  | 301 | Adults     | 36-55    |         |
| Yamada          | Diabetology field | 1995 | Interventional study | 23  | Adults     |          | 46±5    |
| Yang            | Other field       | 2013 | Observational study  | 76  | Adults     |          | 23±1    |
| Yang            | Diabetology field | 2014 | Interventional study | 58  | Mixte      |          | 24±6    |
| Yip             | Diabetology field | 1996 | Observational study  | 50  | Mixte      | 17-49    |         |
| Zerbini         | Diabetology field | 2006 | Observational study  | 146 | Mixte      |          | 17±4    |
| Ziyadeh         | Nephrology field  | 2012 | Observational study  | 50  | Mixte      | 8.0-63   | 28      |
| Zoccali         | Nephrology field  | 1991 | Observational study  | 68  | Adults     | 37-49    |         |
| Zuccala         | Nephrology field  | 1989 | Interventional study | 35  | Mixte      | 14-59    |         |

**Main findings of included studies (in alphabetical order) (continued)**

| <b>First Author</b> | <b>Context</b>                      | <b>GFR Evaluation</b>            | <b>Hyperfiltration CUTOFF Value</b> |
|---------------------|-------------------------------------|----------------------------------|-------------------------------------|
| Abouchacra          | Diabetes/obesity/metabolic syndrome | Creatinine Clearance             |                                     |
| Agaba               | Diabetes/obesity/metabolic syndrome | Creatinine Clearance             | 125.00                              |
| Agarwal             | Diabetes/obesity/metabolic syndrome | Creatinine Clearance             | 120.00                              |
| Aloni               | Other                               | Formulas                         | 140                                 |
| Alvarez             | Other                               | Isotopes / Iohexol / Thiosulfate | 135.00                              |
| Amin                | Diabetes/obesity/metabolic syndrome | Inulin Clearance                 | 125.00                              |
| Amin                | Other                               | Isotopes / Iohexol / Thiosulfate | 141.00                              |
| Apakkan Aksun       | Diabetes/obesity/metabolic syndrome | Formulas                         | 140.00                              |
| Arlet               | Other                               | Isotopes / Iohexol / Thiosulfate | 110.00                              |
| Arnello             | Other                               | Isotopes / Iohexol / Thiosulfate | 140                                 |
| Arutiunov           | Other                               | Creatinine Clearance             |                                     |
| Askenazi            | Other                               | Formulas                         | 150.00                              |
| Attila              | Diabetes/obesity/metabolic syndrome | Isotopes / Iohexol / Thiosulfate | 130.00                              |
| Aygun               | Other                               | Isotopes / Iohexol / Thiosulfate |                                     |
| Aygun               | Other                               | Isotopes / Iohexol / Thiosulfate | 124.00                              |
| Azevedo             | Diabetes/obesity/metabolic syndrome | Isotopes / Iohexol / Thiosulfate | 134.00                              |
| Azevedo             | Diabetes/obesity/metabolic syndrome | Isotopes / Iohexol / Thiosulfate | 134.00                              |
| Azevedo             | Diabetes/obesity/metabolic syndrome | Isotopes / Iohexol / Thiosulfate | 134.00                              |
| Azevedo             | Diabetes/obesity/metabolic syndrome | Isotopes / Iohexol / Thiosulfate | 134.70                              |
| Azevedo             | Diabetes/obesity/metabolic syndrome | Isotopes / Iohexol / Thiosulfate | 134.00                              |
| Azevedo             | Renal reserve                       | Isotopes / Iohexol / Thiosulfate | 136.8                               |
| Bacci               | Diabetes/obesity/metabolic syndrome | Inulin Clearance                 |                                     |
| Bach                | Renal reserve                       | Inulin Clearance                 |                                     |
| Baker               | Other                               | Creatinine Clearance             | 120.00                              |
| Banerjee            | Diabetes/obesity/metabolic syndrome | Isotopes / Iohexol / Thiosulfate | 120.00                              |
| Bankir              | Diabetes/obesity/metabolic syndrome | Creatinine Clearance             |                                     |
| Barai               | Renal reserve                       | Isotopes / Iohexol / Thiosulfate |                                     |
| Barba               | Diabetes/obesity/metabolic syndrome | Creatinine Clearance             |                                     |
| Beasly              | Other                               | Formulas                         |                                     |
| Becker-Cohen        | Other                               | Formulas                         | 175.00                              |
| Belsha              | Other                               | Creatinine Clearance             | 120.00                              |
| Berg                | Diabetes/obesity/metabolic syndrome | Inulin Clearance                 |                                     |

|                |                                     |                                  |        |
|----------------|-------------------------------------|----------------------------------|--------|
| Bergamaschi    | Renal reserve                       | Creatinine Clearance             |        |
| Bjorck         | Diabetes/obesity/metabolic syndrome | Isotopes / Iohexol / Thiosulfate |        |
| Bjornstad      | Diabetes/obesity/metabolic syndrome | Formulas                         | 120    |
| Bjornstad      | Diabetes/obesity/metabolic syndrome | Formulas                         | 135    |
| Blankestijn    | Diabetes/obesity/metabolic syndrome | Isotopes / Iohexol / Thiosulfate | 130.00 |
| Bodas          | Other                               | Formulas                         | 120    |
| Boehler        | Renal reserve                       | Inulin Clearance                 |        |
| Boehler        | Other                               | Inulin Clearance                 |        |
| Boertien       | Diabetes/obesity/metabolic syndrome | Formulas                         |        |
| Bognetti       | Diabetes/obesity/metabolic syndrome | Isotopes / Iohexol / Thiosulfate | 135.00 |
| Bolarinwa      | Other                               | Formulas                         | 140.00 |
| Bouhanick      | Diabetes/obesity/metabolic syndrome | Isotopes / Iohexol / Thiosulfate | 135.00 |
| Bouhanick      | Diabetes/obesity/metabolic syndrome | Isotopes / Iohexol / Thiosulfate | 137    |
| Bruce          | Diabetes/obesity/metabolic syndrome | Isotopes / Iohexol / Thiosulfate | 140.00 |
| Bulum          | Diabetes/obesity/metabolic syndrome | Formulas                         | 125    |
| Cachat         | Other                               | Inulin Clearance                 |        |
| Caramori       | Diabetes/obesity/metabolic syndrome | Isotopes / Iohexol / Thiosulfate |        |
| Caramori       | Diabetes/obesity/metabolic syndrome | Isotopes / Iohexol / Thiosulfate | 134    |
| Carr           | Diabetes/obesity/metabolic syndrome | Isotopes / Iohexol / Thiosulfate |        |
| Carvalho-Braga | Diabetes/obesity/metabolic syndrome | Isotopes / Iohexol / Thiosulfate | 150.00 |
| Catena         | Other                               | Creatinine Clearance             |        |
| Chagnac        | Renal reserve                       | Creatinine Clearance             |        |
| Chagnac        | Diabetes/obesity/metabolic syndrome | Inulin Clearance                 |        |
| Chagnac        | Diabetes/obesity/metabolic syndrome | Inulin Clearance                 |        |
| Chagnac        | Diabetes/obesity/metabolic syndrome | Inulin Clearance                 |        |
| Chaiken        | Diabetes/obesity/metabolic syndrome | Isotopes / Iohexol / Thiosulfate | 140.00 |
| Chandar        | Other                               | Formulas                         | 125.00 |
| Cherney        | Diabetes/obesity/metabolic syndrome | Inulin Clearance                 | 135.00 |
| Cherney        | Diabetes/obesity/metabolic syndrome | Inulin Clearance                 | 135.00 |
| Cherney        | Diabetes/obesity/metabolic syndrome | Inulin Clearance                 | 135.00 |
| Cherney        | Diabetes/obesity/metabolic syndrome | Inulin Clearance                 | 135.00 |
| Cherney        | Diabetes/obesity/metabolic syndrome | Inulin Clearance                 | 135.00 |
| Cherney        | Diabetes/obesity/metabolic syndrome | Inulin Clearance                 | 135.00 |
| Cherney        | Diabetes/obesity/metabolic syndrome | Inulin Clearance                 | 135.00 |
| Cherney        | Diabetes/obesity/metabolic syndrome | Inulin Clearance                 | 135.00 |

|                |                                     |                                  |        |
|----------------|-------------------------------------|----------------------------------|--------|
| Cherney        | Diabetes/obesity/metabolic syndrome | Inulin Clearance                 | 135    |
| Cherney        | Diabetes/obesity/metabolic syndrome | Inulin Clearance                 | 135    |
| Cherney        | Diabetes/obesity/metabolic syndrome | Inulin Clearance                 | 135    |
| Cherney        | Diabetes/obesity/metabolic syndrome | Inulin Clearance                 | 135    |
| Cherney        | Diabetes/obesity/metabolic syndrome | Inulin Clearance                 | 135    |
| Cherney        | Diabetes/obesity/metabolic syndrome | Inulin Clearance                 | 135    |
| Chiarelli      | Diabetes/obesity/metabolic syndrome | Isotopes / Iohexol / Thiosulfate | 140.00 |
| Chiarelli      | Diabetes/obesity/metabolic syndrome | Isotopes / Iohexol / Thiosulfate |        |
| Chowta         | Diabetes/obesity/metabolic syndrome | Formulas                         |        |
| Christiansen   | Diabetes/obesity/metabolic syndrome | Isotopes / Iohexol / Thiosulfate |        |
| Ciavarella     | Diabetes/obesity/metabolic syndrome | Creatinine Clearance             | 148.00 |
| Claris-Appiani | Renal reserve                       | Inulin Clearance                 |        |
| Claris-Appiani | Renal reserve                       | Inulin Clearance                 |        |
| Claris-Appiani | Renal reserve                       | Inulin Clearance                 |        |
| Claris-Appiani | Renal reserve                       | Inulin Clearance                 |        |
| Claris-Appiani | Renal reserve                       | Inulin Clearance                 |        |
| Claus          | Other                               | Creatinine Clearance             | 130    |
| Coppo          | Renal reserve                       | Inulin Clearance                 |        |
| Cotroneo       | Diabetes/obesity/metabolic syndrome | Isotopes / Iohexol / Thiosulfate | 135.00 |
| Cottiero       | Other                               | Isotopes / Iohexol / Thiosulfate | 130.00 |
| Dahl-Jorgensen | Diabetes/obesity/metabolic syndrome | Isotopes / Iohexol / Thiosulfate | 131    |
| Dahlquist      | Diabetes/obesity/metabolic syndrome | Inulin Clearance                 | 125.00 |
| Day            | Other                               | Formulas                         | 140.00 |
| De Carvalho    | Diabetes/obesity/metabolic syndrome | Formulas                         | 140.00 |
| De Faria       | Diabetes/obesity/metabolic syndrome | Inulin Clearance                 |        |
| De Paula       | Other                               | Creatinine Clearance             | 140    |
| De Santo       | Renal reserve                       | Inulin Clearance                 |        |
| De Santo       | Other                               | Inulin Clearance                 |        |
| De Santo       | Renal reserve                       | Inulin Clearance                 |        |
| De Santo       | Renal reserve                       | Inulin Clearance                 |        |
| De Santo       | Renal reserve                       | Inulin Clearance                 |        |
| De Santo       | Renal reserve                       | Inulin Clearance                 |        |
| Delles         | Other                               | Inulin Clearance                 |        |
| Dell'Omo       | Other                               | Formulas                         |        |
| Dengel         | Other                               | Isotopes / Iohexol / Thiosulfate |        |



|               |                                     |                                  |        |
|---------------|-------------------------------------|----------------------------------|--------|
| Dhaene        | Renal reserve                       | Creatinine Clearance             |        |
| Dimitrakov    | Other                               | Creatinine Clearance             | 150.00 |
| Ditzel        | Diabetes/obesity/metabolic syndrome | Isotopes / Iohexol / Thiosulfate |        |
| Dmitrova      | Other                               | Formulas                         | 140    |
| Drummond      | Diabetes/obesity/metabolic syndrome | Inulin Clearance                 | 145.00 |
| Drummond      | Diabetes/obesity/metabolic syndrome | Inulin Clearance                 | 130.00 |
| Du Cailar     | Other                               | Isotopes / Iohexol / Thiosulfate |        |
| Ducic         | Diabetes/obesity/metabolic syndrome | Isotopes / Iohexol / Thiosulfate | 135    |
| Dullaart      | Other                               | Isotopes / Iohexol / Thiosulfate | 123.00 |
| Dura          | Diabetes/obesity/metabolic syndrome | Creatinine Clearance             | 140    |
| Eisenhauer    | Renal reserve                       | Inulin Clearance                 |        |
| Ekberg        | Diabetes/obesity/metabolic syndrome | Isotopes / Iohexol / Thiosulfate |        |
| Ekberg        | Diabetes/obesity/metabolic syndrome | Isotopes / Iohexol / Thiosulfate |        |
| Ekberg        | Diabetes/obesity/metabolic syndrome | Isotopes / Iohexol / Thiosulfate |        |
| Erben         | Diabetes/obesity/metabolic syndrome | Creatinine Clearance             | 132    |
| Erley         | Other                               | Inulin Clearance                 |        |
| Ezequiel      | Diabetes/obesity/metabolic syndrome | Formulas                         |        |
| Felip         | Renal reserve                       | Inulin Clearance                 |        |
| Ficociello    | Diabetes/obesity/metabolic syndrome | Formulas                         | 134.00 |
| Fioretto      | Diabetes/obesity/metabolic syndrome | Isotopes / Iohexol / Thiosulfate | 135.00 |
| Fliser        | Renal reserve                       | Inulin Clearance                 |        |
| Fontseré      | Diabetes/obesity/metabolic syndrome | Isotopes / Iohexol / Thiosulfate | 140.00 |
| Fontseré      | Diabetes/obesity/metabolic syndrome | Isotopes / Iohexol / Thiosulfate | 140.00 |
| Francischetti | Other                               | Creatinine Clearance             |        |
| Frankfurt     | Other                               | Formulas                         |        |
| Friedman      | Renal reserve                       | Isotopes / Iohexol / Thiosulfate |        |
| Friedman      | Diabetes/obesity/metabolic syndrome | Isotopes / Iohexol / Thiosulfate | 120    |
| Fu            | Diabetes/obesity/metabolic syndrome | Formulas                         | 139.00 |
| Fu            | Diabetes/obesity/metabolic syndrome | Formulas                         | 139.00 |
| Fuster-Lluch  | Other                               | Creatinine Clearance             | 120.00 |
| Futrakul      | Diabetes/obesity/metabolic syndrome | Creatinine Clearance             |        |
| Gerchman      | Diabetes/obesity/metabolic syndrome | Creatinine Clearance             |        |
| Gorsnostaeva  | Diabetes/obesity/metabolic syndrome | Formulas                         | 110    |
| Gagnoli       | Diabetes/obesity/metabolic syndrome | Isotopes / Iohexol / Thiosulfate | 139.00 |
| Greene        | Other                               | Inulin Clearance                 |        |

|                 |                                     |                                  |        |
|-----------------|-------------------------------------|----------------------------------|--------|
| Guasch          | Diabetes/obesity/metabolic syndrome | Formulas                         |        |
| Guizar          | Other                               | Inulin Clearance                 |        |
| Gumus           | Renal reserve                       | Isotopes / Iohexol / Thiosulfate | 140.00 |
| Hadj-Aissa      | Other                               | Formulas                         |        |
| Haneda          | Renal reserve                       | Inulin Clearance                 |        |
| Hansen          | Diabetes/obesity/metabolic syndrome | Inulin Clearance                 | 150    |
| Hansen          | Diabetes/obesity/metabolic syndrome | Isotopes / Iohexol / Thiosulfate | 140.00 |
| Har             | Diabetes/obesity/metabolic syndrome | Isotopes / Iohexol / Thiosulfate |        |
| Harrap          | Diabetes/obesity/metabolic syndrome | Inulin Clearance                 | 135.00 |
| Harvey          | Other                               | Inulin Clearance                 |        |
| Haymann         | Diabetes/obesity/metabolic syndrome | Isotopes / Iohexol / Thiosulfate | 132.00 |
| Heering         | Other                               | Formulas                         | 130.00 |
| Heering         | Renal reserve                       | Inulin Clearance                 |        |
| Helal           | Other                               | Inulin Clearance                 |        |
| Hellerstein     | Other                               | Creatinine Clearance             | 140.00 |
| Hernandez-Marco | Renal reserve                       | Formulas                         |        |
| Herrera         | Diabetes/obesity/metabolic syndrome | Creatinine Clearance             | 150.00 |
| Hiragushi       | Renal reserve                       | Inulin Clearance                 |        |
| Hjorth          | Diabetes/obesity/metabolic syndrome | Creatinine Clearance             |        |
| Hladunewich     | Other                               | Isotopes / Iohexol / Thiosulfate | 175.00 |
| Hoang           | Other                               | Inulin Clearance                 |        |
| Hohenstein      | Other                               | Inulin Clearance                 |        |
| Hou             | Diabetes/obesity/metabolic syndrome | Formulas                         | 140.00 |
| Houlihan        | Diabetes/obesity/metabolic syndrome | Formulas                         | 125.00 |
| Huttunen        | Diabetes/obesity/metabolic syndrome | Isotopes / Iohexol / Thiosulfate |        |
| Ishida          | Diabetes/obesity/metabolic syndrome | Isotopes / Iohexol / Thiosulfate |        |
| Ishizaka        | Diabetes/obesity/metabolic syndrome | Isotopes / Iohexol / Thiosulfate |        |
| Jacobs          | Other                               | Formulas                         | 90.70  |
| Jacobs          | Diabetes/obesity/metabolic syndrome | Isotopes / Iohexol / Thiosulfate | 129.00 |
| Janssen         | Diabetes/obesity/metabolic syndrome | Inulin Clearance                 |        |
| Javor           | Diabetes/obesity/metabolic syndrome | Isotopes / Iohexol / Thiosulfate | 130.00 |
| Jenkins         | Other                               | Creatinine Clearance             | 125.00 |
| Jesudason       | Diabetes/obesity/metabolic syndrome | Inulin Clearance                 |        |
| Jin             | Diabetes/obesity/metabolic syndrome | Isotopes / Iohexol / Thiosulfate | 120    |
|                 | Diabetes/obesity/metabolic syndrome | Isotopes / Iohexol / Thiosulfate |        |

|              |                                     |                                  |        |
|--------------|-------------------------------------|----------------------------------|--------|
| Jones        | Diabetes/obesity/metabolic syndrome | Isotopes / Iohexol / Thiosulfate | 135.00 |
| Jones        | Diabetes/obesity/metabolic syndrome | Inulin Clearance                 | 129.00 |
| Juhl         | Diabetes/obesity/metabolic syndrome | Isotopes / Iohexol / Thiosulfate | 125.00 |
| Juraschek    | Renal reserve                       | Formulas                         |        |
| Kalk         | Diabetes/obesity/metabolic syndrome | Isotopes / Iohexol / Thiosulfate | 135.00 |
| Kalk         | Diabetes/obesity/metabolic syndrome | Isotopes / Iohexol / Thiosulfate | 150.00 |
| Kandasamy    | Other                               | Formulas                         |        |
| Keller       | Diabetes/obesity/metabolic syndrome | Inulin Clearance                 | 131.00 |
| Khalil       | Diabetes/obesity/metabolic syndrome | Isotopes / Iohexol / Thiosulfate |        |
| Kimura       | Other                               | Creatinine Clearance             |        |
| Kinebuchi    | Diabetes/obesity/metabolic syndrome | Isotopes / Iohexol / Thiosulfate |        |
| King         | Other                               | Formulas                         | 165.00 |
| Klein        | Diabetes/obesity/metabolic syndrome | Isotopes / Iohexol / Thiosulfate |        |
| Koetje       | Other                               | Inulin Clearance                 |        |
| Korpachev    | Diabetes/obesity/metabolic syndrome | Creatinine Clearance             |        |
| Kotchen      | Other                               | Inulin Clearance                 |        |
| Kralickova   | Other                               | Formulas                         |        |
| Krikken      | Other                               | Isotopes / Iohexol / Thiosulfate |        |
| Krishna      | Renal reserve                       | Inulin Clearance                 |        |
| Kubo         | Other                               | Formulas                         |        |
| Kumar        | Other                               | Formulas                         | 120.00 |
| Laborde      | Diabetes/obesity/metabolic syndrome | Inulin Clearance                 | 160.00 |
| Lafayette    | Other                               | Inulin Clearance                 |        |
| Lafayette    | Other                               | Inulin Clearance                 |        |
| Lalau        | Diabetes/obesity/metabolic syndrome | Isotopes / Iohexol / Thiosulfate |        |
| Lebovitz     | Diabetes/obesity/metabolic syndrome | Isotopes / Iohexol / Thiosulfate | 140.00 |
| Lee          | Other                               | Isotopes / Iohexol / Thiosulfate |        |
| Lee          | Other                               | Inulin Clearance                 |        |
| Lee          | Diabetes/obesity/metabolic syndrome | Isotopes / Iohexol / Thiosulfate | 140.00 |
| Lemley       | Diabetes/obesity/metabolic syndrome | Isotopes / Iohexol / Thiosulfate |        |
| Lemley       | Diabetes/obesity/metabolic syndrome | Isotopes / Iohexol / Thiosulfate |        |
| Lervang      | Diabetes/obesity/metabolic syndrome | Isotopes / Iohexol / Thiosulfate |        |
| Lervang      | Diabetes/obesity/metabolic syndrome | Isotopes / Iohexol / Thiosulfate |        |
| Levitt       | Diabetes/obesity/metabolic syndrome | Isotopes / Iohexol / Thiosulfate |        |
| Levy-Marchal | Diabetes/obesity/metabolic syndrome | Inulin Clearance                 | 160.00 |

|               |                                     |                                  |        |
|---------------|-------------------------------------|----------------------------------|--------|
| Linne         | Diabetes/obesity/metabolic syndrome | Inulin Clearance                 |        |
| Losito        | Other                               | Creatinine Clearance             |        |
| Losito        | Renal reserve                       | Creatinine Clearance             |        |
| Luaces        | Diabetes/obesity/metabolic syndrome | Formulas                         | 120.00 |
| Luik          | Diabetes/obesity/metabolic syndrome | Isotopes / Iohexol / Thiosulfate |        |
| Luippold      | Renal reserve                       | Inulin Clearance                 |        |
| Maeda         | Other                               | Formulas                         | 117.00 |
| Magri         | Diabetes/obesity/metabolic syndrome | Formulas                         | 120.00 |
| Malaki        | Other                               | Formulas                         | 130.00 |
| Mallamaci     | Other                               | Creatinine Clearance             |        |
| Mammen        | Other                               | Isotopes / Iohexol / Thiosulfate | 150.00 |
| Mansy         | Renal reserve                       | Isotopes / Iohexol / Thiosulfate |        |
| Manto         | Diabetes/obesity/metabolic syndrome | Isotopes / Iohexol / Thiosulfate | 135.00 |
| Marcovecchio  | Diabetes/obesity/metabolic syndrome | Inulin Clearance                 |        |
| Marouf        | Other                               | Formulas                         | 140.00 |
| Marre         | Diabetes/obesity/metabolic syndrome | Isotopes / Iohexol / Thiosulfate |        |
| Martens       | Other                               | Isotopes / Iohexol / Thiosulfate | 145.00 |
| Marzano       | Diabetes/obesity/metabolic syndrome | Isotopes / Iohexol / Thiosulfate | 138.00 |
| Matteucci     | Diabetes/obesity/metabolic syndrome | Creatinine Clearance             |        |
| Mauer         | Diabetes/obesity/metabolic syndrome | Isotopes / Iohexol / Thiosulfate | 130.00 |
| McCarville    | Other                               | Isotopes / Iohexol / Thiosulfate | 120    |
| McPherson Yee | Other                               | Formulas                         |        |
| Meeme         | Diabetes/obesity/metabolic syndrome | Creatinine Clearance             | 130.00 |
| Melis         | Other                               | Creatinine Clearance             |        |
| Melsom        | Diabetes/obesity/metabolic syndrome | Isotopes / Iohexol / Thiosulfate |        |
| Melsom        | Other                               | Isotopes / Iohexol / Thiosulfate |        |
| Miller        | Diabetes/obesity/metabolic syndrome | Inulin Clearance                 |        |
| Miltenyi      | Diabetes/obesity/metabolic syndrome | Creatinine Clearance             |        |
| Mimran        | Other                               | Isotopes / Iohexol / Thiosulfate |        |
| Mizuiru       | Renal reserve                       | Inulin Clearance                 |        |
| Mocan         | Diabetes/obesity/metabolic syndrome | Creatinine Clearance             | 137.00 |
| Mogensen      | Diabetes/obesity/metabolic syndrome | Isotopes / Iohexol / Thiosulfate |        |
| Mogensen      | Diabetes/obesity/metabolic syndrome | Isotopes / Iohexol / Thiosulfate |        |
| Mogensen      | Diabetes/obesity/metabolic syndrome | Isotopes / Iohexol / Thiosulfate | 150.00 |
| Monami        | Diabetes/obesity/metabolic syndrome | Formulas                         | 102.50 |

|              |                                     |                                  |        |
|--------------|-------------------------------------|----------------------------------|--------|
| Monster      | Other                               | Creatinine Clearance             |        |
| Montanari    | Diabetes/obesity/metabolic syndrome | Inulin Clearance                 |        |
| Montini      | Renal reserve                       | Inulin Clearance                 |        |
| Moran        | Other                               | Inulin Clearance                 |        |
| Moriya       | Diabetes/obesity/metabolic syndrome | Isotopes / Iohexol / Thiosulfate | 134.00 |
| Morrone      | Renal reserve                       | Inulin Clearance                 |        |
| Mueller      | Other                               | Creatinine Clearance             |        |
| Myers        | Diabetes/obesity/metabolic syndrome | Isotopes / Iohexol / Thiosulfate |        |
| Nair         | Diabetes/obesity/metabolic syndrome | Inulin Clearance                 |        |
| Nakamura     | Renal reserve                       | Creatinine Clearance             |        |
| Nakamura     | Renal reserve                       | Creatinine Clearance             |        |
| Nakamura     | Renal reserve                       | Creatinine Clearance             |        |
| Nakamura     | Diabetes/obesity/metabolic syndrome | Isotopes / Iohexol / Thiosulfate |        |
| Navarro-Diaz | Diabetes/obesity/metabolic syndrome | Creatinine Clearance             | 140.00 |
| Nelson       | Diabetes/obesity/metabolic syndrome | Isotopes / Iohexol / Thiosulfate |        |
| Neto         | Diabetes/obesity/metabolic syndrome | Creatinine Clearance             | 140.00 |
| New          | Diabetes/obesity/metabolic syndrome | Isotopes / Iohexol / Thiosulfate | 140.00 |
| Ng           | Other                               | Isotopes / Iohexol / Thiosulfate |        |
| Nielsen      | Diabetes/obesity/metabolic syndrome | Isotopes / Iohexol / Thiosulfate |        |
| Nistrup      |                                     |                                  |        |
| holmegaard   | Other                               | Creatinine Clearance             | 150.00 |
| Nordgren     | Diabetes/obesity/metabolic syndrome | Isotopes / Iohexol / Thiosulfate | 145.00 |
| Norgaard     | Renal reserve                       | Isotopes / Iohexol / Thiosulfate |        |
| Novikova     | Diabetes/obesity/metabolic syndrome | Formulas                         | 110    |
| Nowack       | Diabetes/obesity/metabolic syndrome | Inulin Clearance                 | 140.00 |
| Nyberg       | Other                               | Inulin Clearance                 |        |
| Odutola      | Diabetes/obesity/metabolic syndrome | Creatinine Clearance             | 125.00 |
| Ohashi       | Diabetes/obesity/metabolic syndrome | Creatinine Clearance             | 140    |
| Okada        | Diabetes/obesity/metabolic syndrome | Formulas                         | 114    |
| Okada        | Other                               | Formulas                         | 103.00 |
| Okada        | Diabetes/obesity/metabolic syndrome | Formulas                         | 117.00 |
| Oterdoom     | Other                               | Creatinine Clearance             |        |
| Paiva        | Diabetes/obesity/metabolic syndrome | Isotopes / Iohexol / Thiosulfate |        |
| Palatini     | Other                               | Creatinine Clearance             | 150.00 |
| Palatini     | Other                               | Creatinine Clearance             | 140.00 |

|                  |                                     |                                  |        |
|------------------|-------------------------------------|----------------------------------|--------|
| Palatini         | Other                               | Creatinine Clearance             |        |
| Palatini         | Other                               | Creatinine Clearance             | 150.00 |
| Palatini         | Other                               | Creatinine Clearance             | 150    |
| Palmisano        | Diabetes/obesity/metabolic syndrome | Isotopes / Iohexol / Thiosulfate | 140    |
| Park             | Other                               | Formulas                         | 122.00 |
| Pecis            | Diabetes/obesity/metabolic syndrome | Isotopes / Iohexol / Thiosulfate | 134.00 |
| Pecis            | Diabetes/obesity/metabolic syndrome | Isotopes / Iohexol / Thiosulfate | 134.00 |
| Pecly            | Renal reserve                       | Inulin Clearance                 |        |
| Pedersen         | Diabetes/obesity/metabolic syndrome | Isotopes / Iohexol / Thiosulfate |        |
| Perelstein       | Other                               | Creatinine Clearance             |        |
| Perkins          | Diabetes/obesity/metabolic syndrome | Inulin Clearance                 | 135.00 |
| Pham             | Diabetes/obesity/metabolic syndrome | Formulas                         |        |
| Piepsz           | Other                               | Isotopes / Iohexol / Thiosulfate | 135.00 |
| Pinho-Silveiro   | Diabetes/obesity/metabolic syndrome | Isotopes / Iohexol / Thiosulfate | 137    |
| Pinto-Sietsman   | Other                               | Formulas                         |        |
| Pistrosch        | Diabetes/obesity/metabolic syndrome | Inulin Clearance                 |        |
| Ponder           | Diabetes/obesity/metabolic syndrome | Creatinine Clearance             | 140.2  |
| Prematane        | Diabetes/obesity/metabolic syndrome | Isotopes / Iohexol / Thiosulfate | 130.00 |
| Prestidge        | Other                               | Isotopes / Iohexol / Thiosulfate | 145.00 |
| Pruijm           | Diabetes/obesity/metabolic syndrome | Inulin Clearance                 | 140.00 |
| Quinn            | Other                               | Creatinine Clearance             | 187.00 |
| Raes             | Diabetes/obesity/metabolic syndrome | Inulin Clearance                 |        |
| Rajic            | Diabetes/obesity/metabolic syndrome | Isotopes / Iohexol / Thiosulfate | 137.00 |
| Regolisti        | Other                               | Isotopes / Iohexol / Thiosulfate |        |
| Reitsma-Bierens  | Other                               | Isotopes / Iohexol / Thiosulfate | 145.00 |
| Ribstein         | Other                               | Isotopes / Iohexol / Thiosulfate | 140.00 |
| Ribstein         | Other                               | Isotopes / Iohexol / Thiosulfate |        |
| Rigalleau        | Diabetes/obesity/metabolic syndrome | Isotopes / Iohexol / Thiosulfate | 130.00 |
| Rius             | Diabetes/obesity/metabolic syndrome | Isotopes / Iohexol / Thiosulfate | 157.00 |
| Rodriguez-Iturbe | Renal reserve                       | Creatinine Clearance             |        |
| Rodriguez-Iturbe | Renal reserve                       | Inulin Clearance                 |        |
| Roels            | Renal reserve                       | Creatinine Clearance             |        |
| Rota             | Diabetes/obesity/metabolic syndrome | Inulin Clearance                 | 150.00 |
| Rudberg          | Diabetes/obesity/metabolic syndrome | Isotopes / Iohexol / Thiosulfate | 125.00 |
| Rudberg          | Diabetes/obesity/metabolic syndrome | Isotopes / Iohexol / Thiosulfate | 125.00 |

|              |                                     |                                  |        |
|--------------|-------------------------------------|----------------------------------|--------|
| Ruggenti     | Diabetes/obesity/metabolic syndrome | Inulin Clearance                 |        |
| Ruggenti     | Diabetes/obesity/metabolic syndrome | Isotopes / Iohexol / Thiosulfate | 120.00 |
| Sackmann     | Diabetes/obesity/metabolic syndrome | Inulin Clearance                 | 140.00 |
| Sackmann     | Diabetes/obesity/metabolic syndrome | Inulin Clearance                 |        |
| Sauriasari   | Other                               | Creatinine Clearance             | 96.70  |
| Sawacki      | Diabetes/obesity/metabolic syndrome | Creatinine Clearance             | 140    |
| Schell       | Other                               | Inulin Clearance                 | 170.00 |
| Schlaich     | Other                               | Inulin Clearance                 |        |
| Schmieder    | Other                               | Creatinine Clearance             |        |
| Schmieder    | Other                               | Inulin Clearance                 |        |
| Schmieder    | Other                               | Creatinine Clearance             | 130.00 |
| Schmitt      | Other                               | Inulin Clearance                 |        |
| Schmitz      | Diabetes/obesity/metabolic syndrome | Isotopes / Iohexol / Thiosulfate |        |
| Schmitz      | Diabetes/obesity/metabolic syndrome | Isotopes / Iohexol / Thiosulfate |        |
| Schmitz      | Diabetes/obesity/metabolic syndrome | Isotopes / Iohexol / Thiosulfate |        |
| Schou        | Other                               | Formulas                         |        |
| Sebekova     | Diabetes/obesity/metabolic syndrome | Creatinine Clearance             |        |
| Sechi        | Other                               | Creatinine Clearance             |        |
| Selistre     | Other                               | Inulin Clearance                 | 135.00 |
| Sellers      | Diabetes/obesity/metabolic syndrome | Formulas                         | 140.00 |
| Semplicini   | Other                               | Inulin Clearance                 |        |
| Serri        | Diabetes/obesity/metabolic syndrome | Isotopes / Iohexol / Thiosulfate | 133.00 |
| Signorini    | Diabetes/obesity/metabolic syndrome | Isotopes / Iohexol / Thiosulfate |        |
| Silva Junior | Other                               | Formulas                         | 120.00 |
| Silveiro     | Diabetes/obesity/metabolic syndrome | Isotopes / Iohexol / Thiosulfate | 137.10 |
| Simon        | Renal reserve                       | Inulin Clearance                 |        |
| Smoyer       | Renal reserve                       | Inulin Clearance                 |        |
| Sochett      | Diabetes/obesity/metabolic syndrome | Inulin Clearance                 | 135.00 |
| Soldo        | Diabetes/obesity/metabolic syndrome | Creatinine Clearance             | 130    |
| Solerte      | Diabetes/obesity/metabolic syndrome | Isotopes / Iohexol / Thiosulfate |        |
| Soper        | Diabetes/obesity/metabolic syndrome | Inulin Clearance                 | 145.00 |
| Steinke      | Diabetes/obesity/metabolic syndrome | Isotopes / Iohexol / Thiosulfate | 130    |
| Stephenson   | Diabetes/obesity/metabolic syndrome | Isotopes / Iohexol / Thiosulfate | 120.00 |
| Sterner      | Diabetes/obesity/metabolic syndrome | Isotopes / Iohexol / Thiosulfate | 120.00 |
| Strzelecka-  | Other                               | Creatinine Clearance             | 150    |

|                 |                                     |                                  |        |
|-----------------|-------------------------------------|----------------------------------|--------|
| Lichota         |                                     |                                  |        |
| Stuveling       | Other                               | Creatinine Clearance             |        |
| Taniwaki        | Diabetes/obesity/metabolic syndrome | Isotopes / Iohexol / Thiosulfate |        |
| ter Wee         | Diabetes/obesity/metabolic syndrome | Isotopes / Iohexol / Thiosulfate | 130.00 |
| Ter Wee         | Renal reserve                       | Isotopes / Iohexol / Thiosulfate |        |
| Thomas          | Other                               | Isotopes / Iohexol / Thiosulfate |        |
| Thomas          | Diabetes/obesity/metabolic syndrome | Formulas                         | 130.00 |
| Thompson        | Other                               | Isotopes / Iohexol / Thiosulfate |        |
| Thraikill       | Diabetes/obesity/metabolic syndrome | Formulas                         | 130.00 |
| Tiengo          | Diabetes/obesity/metabolic syndrome | Isotopes / Iohexol / Thiosulfate | 135.00 |
| Tietze          | Renal reserve                       | Isotopes / Iohexol / Thiosulfate |        |
| Toenshoff       | Diabetes/obesity/metabolic syndrome | Inulin Clearance                 |        |
| Tomaszewski     | Diabetes/obesity/metabolic syndrome | Formulas                         |        |
| Torbjornsdotter | Diabetes/obesity/metabolic syndrome | Inulin Clearance                 |        |
| Tsai            | Diabetes/obesity/metabolic syndrome | Formulas                         |        |
| Tuttle          | Diabetes/obesity/metabolic syndrome | Inulin Clearance                 |        |
| Tuttle          | Diabetes/obesity/metabolic syndrome | Inulin Clearance                 | 127.00 |
| Uemasu          | Renal reserve                       | Creatinine Clearance             |        |
| Uemasu          | Renal reserve                       | Creatinine Clearance             |        |
| Unuigbe         | Diabetes/obesity/metabolic syndrome | Creatinine Clearance             | 125.00 |
| Valensi         | Diabetes/obesity/metabolic syndrome | Creatinine Clearance             |        |
| Vanrenterghem   | Renal reserve                       | Inulin Clearance                 |        |
| Vasavda         | Other                               | Formulas                         | 140.00 |
| Vasovic         | Diabetes/obesity/metabolic syndrome | Isotopes / Iohexol / Thiosulfate | 125    |
| Vedder          | Other                               | Creatinine Clearance             | 125.00 |
| Vedel           | Diabetes/obesity/metabolic syndrome | Isotopes / Iohexol / Thiosulfate | 140.00 |
| Veldman         | Diabetes/obesity/metabolic syndrome | Inulin Clearance                 | 150.00 |
| Vervoort        | Diabetes/obesity/metabolic syndrome | Inulin Clearance                 | 130.00 |
| Viberti         | Diabetes/obesity/metabolic syndrome | Inulin Clearance                 | 135.00 |
| Vora            | Diabetes/obesity/metabolic syndrome | Isotopes / Iohexol / Thiosulfate | 120.00 |
| Ware            | Other                               | Isotopes / Iohexol / Thiosulfate | 120    |
| Weaver          | Other                               | Creatinine Clearance             |        |
| Weaver          | Other                               | Formulas                         |        |
| Widstam-Attrops | Diabetes/obesity/metabolic syndrome | Inulin Clearance                 | 125.00 |
| Wiesmayr        | Other                               | Formulas                         | 80.00  |



|           |                                     |                                  |        |
|-----------|-------------------------------------|----------------------------------|--------|
| Wigfall   | Other                               | Formulas                         | 120.00 |
| Williams  | Diabetes/obesity/metabolic syndrome | Isotopes / Iohexol / Thiosulfate | 120.00 |
| Wirta     | Diabetes/obesity/metabolic syndrome | Isotopes / Iohexol / Thiosulfate | 129.00 |
| Wiseman   | Diabetes/obesity/metabolic syndrome | Isotopes / Iohexol / Thiosulfate |        |
| Wiseman   | Other                               | Isotopes / Iohexol / Thiosulfate | 135.00 |
| Wiseman   | Other                               | Isotopes / Iohexol / Thiosulfate |        |
| Woitas    | Other                               | Inulin Clearance                 |        |
| Wolfsdorf | Other                               | Creatinine Clearance             | 140.00 |
| Wollesen  | Diabetes/obesity/metabolic syndrome | Isotopes / Iohexol / Thiosulfate | 135.00 |
| Wong      | Other                               | Inulin Clearance                 |        |
| Wong      | Other                               | Inulin Clearance                 |        |
| Wong      | Other                               | Isotopes / Iohexol / Thiosulfate |        |
| Wong      | Other                               | Inulin Clearance                 |        |
| Woo       | Other                               | Formulas                         | 150.00 |
| Wu        | Other                               | Formulas                         |        |
| Wu        | Other                               | Formulas                         | 111.50 |
| Wuerzner  | Diabetes/obesity/metabolic syndrome | Inulin Clearance                 | 140.00 |
| Yamada    | Diabetes/obesity/metabolic syndrome | Creatinine Clearance             | 150.00 |
| Yang      | Diabetes/obesity/metabolic syndrome | Inulin Clearance                 | 135    |
| Yang      | Diabetes/obesity/metabolic syndrome | Inulin Clearance                 | 135    |
| Yip       | Diabetes/obesity/metabolic syndrome | Isotopes / Iohexol / Thiosulfate | 135.00 |
| Zerbini   | Diabetes/obesity/metabolic syndrome | Isotopes / Iohexol / Thiosulfate |        |
| Ziyadeh   | Other                               | Formulas                         | 134.00 |
| Zoccali   | Other                               | Creatinine Clearance             | 150.00 |
| Zuccala   | Other                               | Creatinine Clearance             |        |

## **Online supplementary material 6**

### **Summary of bibliographic findings**

#### **Retrieved papers from the 3 databases no selection**

A list of the 2013 retrieved articles from the 3 databases is available upon request to the corresponding author.

#### **Selected reference for full text reading after title and abstract reading**

A list of the 694 selected articles for full text reading is available upon request to the corresponding author.

#### **Complete references of selected studies final selection after full text reading**

1. Abouchacra S, Chaaban A, Gebran N, Hussein Q, Ahmed M, Bernieh B, et al. GFR estimation in the morbidly obese pre- and postbariatric surgery: one size does not fit all. *International urology and nephrology*. 2013;45(1):157-62.
2. Agaba EI, Agaba PA, Puepet FA, Achinge G. Pattern of glomerular filtration rate abnormalities in type 2 diabetes mellitus in Jos, Nigeria. *The Nigerian postgraduate medical journal*. 2004;11(4):262-4.
3. Agrawal V, Liu XJ, Lagoy A, Discenza I, Romanelli J, Silva JE, et al. Effect of protein intake on amelioration of glomerular hyperfiltration in morbidly obese adults after Roux-en-Y gastric bypass surgery. *American Journal of Kidney Diseases*. 2011;57(4):A18.
4. Aloni MN, Ngiyulu RM, Gini-Ehungu JL, Nsibu CN, Ekila MB, Lepira FB, et al. Renal function in children suffering from sickle cell disease: challenge of early detection in highly resource-scarce settings. *PLoS one*. 2014;9(5):e96561.
5. Alvarez O, Miller ST, Wang WC, Luo Z, McCarville MB, Schwartz GJ, et al. Effect of hydroxyurea treatment on renal function parameters: results from the multi-center placebo-controlled BABY HUG clinical trial for infants with sickle cell anemia. *Pediatric blood & cancer*. 2012;59(4):668-74.
6. Amin A, El-Sayed S, Taher N, Sedki M, Nasr H. Tc-99m diethylenetriamine pentaacetic acid (DTPA) renal function reserve estimation: is it a reliable predictive tool for assessment of preclinical renal involvement in scleroderma patients? *Clinical rheumatology*. 2012;31(6):961-6.
7. Amin R, Turner C, van Aken S, Bahu TK, Watts A, Lindsell DR, et al. The relationship between microalbuminuria and glomerular filtration rate in young type 1 diabetic subjects: The Oxford Regional Prospective Study. *Kidney Int*. 2005;68(4):1740-9.
8. Apakkan Aksun S, Ozmen B, Ozmen D, Parildar Z, Senol B, Habif S, et al. Serum and urinary nitric oxide in Type 2 diabetes with or without microalbuminuria: Relation to glomerular hyperfiltration. *Journal of diabetes and its complications*. 2003;17(6):343-8.
9. Appiani AC, Assael BM, Tirelli AS, Cavanna G, Marra G. Sodium excretion and hyperfiltration during glucose infusion in man. *Am J Nephrol*. 1990;10(2):103-8.
10. Arlet JB, Ribeil JA, Chatellier G, Eladari D, De Seigneux S, Souberbielle JC, et al. Determination of the best method to estimate glomerular filtration rate from serum creatinine in adult patients with sickle cell disease: A prospective observational cohort study. *BMC Nephrology*. 2012;13(1).
11. Arnello F, Ham HR, Tondeur M, Piepsz A. Overall and single-kidney clearance in children with urinary tract infection and damaged kidneys. *Journal of nuclear medicine : official publication, Society of Nuclear Medicine*. 1999;40(1):52-5.
12. Arutiunov GP, Oganezova LG. [Hyperfiltration in hypertensive patients: results of epidemiological studies]. *Terapevticheskii arkhiv*. 2009;81(8):24-30.

13. Askenazi DJ, Feig DI, Graham NM, Hui-Stickle S, Goldstein SL. 3-5 year longitudinal follow-up of pediatric patients after acute renal failure. *Kidney Int.* 2006;69(1):184-9.
14. Aygun B, Mortier NA, Smeltzer MP, Hankins JS, Ware RE. Glomerular hyperfiltration and albuminuria in children with sickle cell anemia. *Pediatric Nephrology.* 2011;26(8):1285-90.
15. Aygun B, Mortier NA, Smeltzer MP, Shulkin BL, Hankins JS, Ware RE. Hydroxyurea treatment decreases glomerular hyperfiltration in children with sickle cell anemia. *American journal of hematology.* 2013;88(2):116-9.
16. Azevedo MJ, Gross JL. Systolic hypertension in IDDM patients with hyperfiltration and normal albumin excretion rates. *Diabetes Care.* 1990;13(4):452-3.
17. Azevedo MJ, Gross JL. Follow-up of glomerular hyperfiltration in normoalbuminuric Type 1 (insulin-dependent) diabetic patients. *Diabetologia.* 1991;34(8):611.
18. Azevedo MJ, Pinotti AF, Gross JL, Stumpf AG, Ribeiro JP. Preserved left ventricular systolic and diastolic function in normoalbuminuric insulin-dependent diabetic patients with glomerular hyperfiltration. *Diabetes research and clinical practice.* 1994;25(2):103-10.
19. Bacci S, De Cosmo S, Garruba M, Placentino G, Liuzzi A, Barbano F, et al. Role of insulin-like growth factor (IGF)-1 in the modulation of renal haemodynamics in Type I diabetic patients. *Diabetologia.* 2000;43(7):922-6.
20. Bach D, Mrowka H, Schauseil S, Grabensee B. Renal functional reserve in patients with IgA glomerulopathy. *Renal failure.* 1994;16(5):617-27.
21. Baker L, Dahlem S, Goldfarb S, Kern EF, Stanley CA, Egler J, et al. Hyperfiltration and renal disease in glycogen storage disease, type I. *Kidney Int.* 1989;35(6):1345-50.
22. Banerjee S, Ghosh US, Saha SJ. Role of GFR estimation in assessment of the status of nephropathy in type 2 diabetes mellitus. *The Journal of the Association of Physicians of India.* 2005;53:181-4.
23. Bankir L, Sellin F, Maillard M, Chiolero A, Burnier M. Influence of moderate body weight excess on the nycthemeral pattern of blood pressure, renal function and sodium and water excretion in patients with essential hypertension. *Archives des maladies du coeur et des vaisseaux.* 2004;97(7-8):777-81.
24. Barba G, Cappuccio FP, Russo L, Stinga F, Iacone R, Strazzullo P. Renal function and blood pressure response to dietary salt restriction in normotensive men. *Hypertension.* 1996;27(5):1160-4.
25. Beasley JM, Aragaki AK, LaCroix AZ, Neuhauser ML, Tinker LF, Cauley JA, et al. Higher biomarker-calibrated protein intake is not associated with impaired renal function in postmenopausal women. *The Journal of nutrition.* 2011;141(8):1502-7.
26. Becker-Cohen R, Elstein D, Abrahamov A, Algur N, Rudensky B, Hadas-Halpern I, et al. A comprehensive assessment of renal function in patients with Gaucher disease. *American Journal of Kidney Diseases.* 2005;46(5):837-44.
27. Belsha CW, Wells TG, McNiece KL, Seib PM, Plummer JK, Berry PL. Influence of diurnal blood pressure variations on target organ abnormalities in adolescents with mild essential hypertension. *American journal of hypertension.* 1998;11(4 Pt 1):410-7.
28. Berg UB, Torbjornsdotter TB, Jaremko G, Thalme B. Kidney morphological changes in relation to long-term renal function and metabolic control in adolescents with IDDM. *Diabetologia.* 1998;41(9):1047-56.
29. Bergamaschi E, Buzio C, Mutti A, Perazzoli F, Alinovi R, Negro A. Renal response to acute protein loads: hyperfiltration and proteinuria are time-related effects not influenced by the quality of ingested proteins. *Contributions to nephrology.* 1990;83:170-4.
30. Berry GT, Baynes JW, Wells-Knecht KJ, Szwergold BS, Santer R. Elements of diabetic nephropathy in a patient with GLUT2 deficiency. *Molecular genetics and metabolism.* 2005;86(4):473-7.
31. Bjorck S, Aurell M, Bresater LE, Herlitz H, Welin L, Wikstrand J. Renal sensitivity to angiotensin II in type 1 diabetes. *Scandinavian journal of urology and nephrology.* 1990;24(4):267-73.

32. Bjornstad P, McQueen RB, Snell-Bergeon JK, Cherney D, Pyle L, Perkins B, et al. Fasting Blood Glucose-A Missing Variable for GFR-Estimation in Type 1 Diabetes? *PloS one*. 2014;9(4):e96264.
33. Blankestijn PJ, Derkx FH, Birkenhager JC, Lamberts SW, Mulder P, Verschoor L, et al. Glomerular hyperfiltration in insulin-dependent diabetes mellitus is correlated with enhanced growth hormone secretion. *The Journal of clinical endocrinology and metabolism*. 1993;77(2):498-502.
34. Bodas P, Huang A, O'Riordan MA, Sedor JR, Dell KM. The prevalence of hypertension and abnormal kidney function in children with sickle cell disease -a cross sectional review. *BMC Nephrol*. 2013;14:237.
35. Boertien WE, Riphagen IJ, Drion I, Alkhalaf A, Bakker SJL, Groenier KH, et al. Copeptin, a surrogate marker for vasopressin, is associated with chronic kidney disease progression in patients with diabetes mellitus (ZODIAC-33). *Diabetologia*. 2012;55:S70.
36. Boggetti E, Meschi F, Bonfanti R, Gianolli L, Chiumello G. Decrease of glomerular hyperfiltration in short-term diabetic adolescents without microalbuminuria. *Diabetes Care*. 1993;16(1):120-4.
37. Bohler J, Becker A, Reetze-Bonorden P, Woitas R, Keller E, Schollmeyer P. Effect of antihypertensive drugs on glomerular hyperfiltration and renal haemodynamics. Comparison of captopril with nifedipine, metoprolol and celiprolol. *European journal of clinical pharmacology*. 1993;44 Suppl 1:S57-61.
38. Bohler J, Woitas R, Keller E, Reetze-Bonorden P, Schollmeyer PJ. Effect of nifedipine and captopril on glomerular hyperfiltration in normotensive man. *American Journal of Kidney Diseases*. 1992;20(2):132-9.
39. Bolarinwa RA, Akinlade KS, Kuti MA, Olawale OO, Akinola NO. Renal disease in adult Nigerians with sickle cell anemia: a report of prevalence, clinical features and risk factors. *Saudi journal of kidney diseases and transplantation : an official publication of the Saudi Center for Organ Transplantation, Saudi Arabia*. 2012;23(1):171-5.
40. Bouhanick B, Gallois Y, Hadjadj S, Boux de Casson F, Limal JM, Marre M. Relationship between glomerular hyperfiltration and ACE insertion/deletion polymorphism in type 1 diabetic children and adolescents. *Diabetes Care*. 1999;22(4):618-22.
41. Bouhanick B, Suraniti S, Berrut G, Bled F, Simard G, Lejeune JJ, et al. Relationship between fat intake and glomerular filtration rate in normotensive insulin-dependent diabetic patients. *Diabete et Metabolisme*. 1995;21(3):168-72.
42. Bruce R, Rutland M, Cundy T. Glomerular hyperfiltration in young Polynesians with type 2 diabetes. *Diabetes research and clinical practice*. 1994;25(3):155-60.
43. Bulum T, Kolaric B, Prkacin I, Duvnjak L. Hyperfiltration in normoalbuminuric type 1 diabetic patients: Relationship with urinary albumin excretion rate. *Collegium antropologicum*. 2013;37(2):471-6.
44. Cachat F, Combescure C, Chehade H, Zeier G, Mosig D, Meyrat B, et al. Microalbuminuria and hyperfiltration in subjects with nephro-urological disorders. *Nephrology, dialysis, transplantation : official publication of the European Dialysis and Transplant Association - European Renal Association*. 2013;28(2):386-91.
45. Carr S, Mbanya JC, Thomas T, Keavey P, Taylor R, Alberti KG, et al. Increase in glomerular filtration rate in patients with insulin-dependent diabetes and elevated erythrocyte sodium-lithium countertransport. *The New England journal of medicine*. 1990;322(8):500-5.
46. Carvalho-Braga D, Almeida R, Azevedo M, Amaral I, Medina J, Hargreaves M. Glomerular hyperfiltration in insulin-dependent diabetes mellitus: no evidence for enhanced activity of the renin-angiotensin-aldosterone system. *The Journal of diabetic complications*. 1991;5(2-3):126-7.
47. Catena C, Colussi G, Nadalini E, Chiuch A, Baroselli S, Lapenna R, et al. Relationships of plasma renin levels with renal function in patients with primary aldosteronism. *Clinical journal of the American Society of Nephrology : CJASN*. 2007;2(4):722-31.
48. Chagnac A, Gafer U, Zevin D, Hirsch Y, Markovitz I, Levi J. Enalapril attenuates glomerular hyperfiltration following a meat meal. *Nephron*. 1989;51(4):466-9.

49. Chagnac A, Herman M, Zingerman B, Erman A, Rozen-Zvi B, Hirsh J, et al. Obesity-induced glomerular hyperfiltration: Its involvement in the pathogenesis of tubular sodium reabsorption. *Nephrology Dialysis Transplantation*. 2008;23(12):3946-52.
50. Chagnac A, Weinstein T, Herman M, Hirsh J, Gafer U, Ori Y. The effects of weight loss on renal function in patients with severe obesity. *Journal of the American Society of Nephrology*. 2003;14(6):1480-6.
51. Chaiken RL, Eckert-Norton M, Bard M, Banerji MA, Palmisano J, Sachimechi I, et al. Hyperfiltration in African-American patients with type 2 diabetes. Cross-sectional and longitudinal data. *Diabetes Care*. 1998;21(12):2129-34.
52. Chandar J, Abitbol C, Montane B, Zilleruelo G. Angiotensin blockade as sole treatment for proteinuric kidney disease in children. *Nephrology, dialysis, transplantation : official publication of the European Dialysis and Transplant Association - European Renal Association*. 2007;22(5):1332-7.
53. Cherney DZ, Miller JA, Scholey JW, Bradley TJ, Slorach C, Curtis JR, et al. The effect of cyclooxygenase-2 inhibition on renal hemodynamic function in humans with type 1 diabetes. *Diabetes*. 2008;57(3):688-95.
54. Cherney DZ, Miller JA, Scholey JW, Nasrallah R, Hebert RL, Dekker MG, et al. Renal hyperfiltration is a determinant of endothelial function responses to cyclooxygenase 2 inhibition in type 1 diabetes. *Diabetes Care*. 2010;33(6):1344-6.
55. Cherney DZ, Perkins BA, Soleymanlou N, Maione M, Lai V, Lee A, et al. Renal hemodynamic effect of sodium-glucose cotransporter 2 inhibition in patients with type 1 diabetes mellitus. *Circulation*. 2014;129(5):587-97.
56. Cherney DZ, Reich HN, Jiang S, Har R, Nasrallah R, Hebert RL, et al. Hyperfiltration and effect of nitric oxide inhibition on renal and endothelial function in humans with uncomplicated type 1 diabetes mellitus. *American journal of physiology Regulatory, integrative and comparative physiology*. 2012;303(7):R710-8.
57. Cherney DZ, Sochett EB. Evolution of renal hyperfiltration and arterial stiffness from adolescence into early adulthood in type 1 diabetes. *Diabetes Care*. 2011;34(8):1821-6.
58. Cherney DZ, Sochett EB, Dekker MG, Perkins BA. Ability of cystatin C to detect acute changes in glomerular filtration rate provoked by hyperglycaemia in uncomplicated Type 1 diabetes. *Diabetic medicine : a journal of the British Diabetic Association*. 2010;27(12):1358-65.
59. Cherney DZ, Sochett EB, Lai V, Dekker MG, Slorach C, Scholey JW, et al. Renal hyperfiltration and arterial stiffness in humans with uncomplicated type 1 diabetes. *Diabetes Care*. 2010;33(9):2068-70.
60. Cherney DZ, Sochett EB, Miller JA. Gender differences in renal responses to hyperglycemia and angiotensin-converting enzyme inhibition in diabetes. *Kidney Int*. 2005;68(4):1722-8.
61. Chiarelli F, Cipollone F, Romano F, Tumini S, Costantini F, di Ricco L, et al. Increased circulating nitric oxide in young patients with type 1 diabetes and persistent microalbuminuria: relation to glomerular hyperfiltration. *Diabetes*. 2000;49(7):1258-63.
62. Chiarelli F, Verrotti A, Morgese G. Glomerular hyperfiltration increases the risk of developing microalbuminuria in diabetic children. *Pediatric Nephrology*. 1995;9(2):154-8.
63. Chowta MN, Adhikari PM, Chowta NK, Shenoy AK, D'Souza S. Serum C peptide level and renal function in diabetes mellitus. *Indian journal of nephrology*. 2010;20(1):25-8.
64. Christiansen EH, Molgaard H, Christensen PD, Sorensen KE, Christensen CK, Mogensen CE. Increased left ventricular systolic function in insulin dependent diabetic patients with normal albumin excretion. *European heart journal*. 1998;19(11):1735-9.
65. Ciavarella A, Galuppi V, Forlani G, Vannini P. The prevalence of glomerular hyperfiltration in type 1 (insulin-dependent) diabetes mellitus. *Diabete & metabolismo*. 1988;14(1):73-4.
66. Claris-Appiani A, Assael BM, Tirelli AS, Cavanna G, Corbetta C, Marra G. Proximal tubular function and hyperfiltration during amino acid infusion in man. *American Journal of Nephrology*. 1988;8(2):96-101.
67. Claris-Appiani A, Assael BM, Tirelli AS, Marra G, Cavanna G. Lack of glomerular hemodynamic stimulation after infusion of branched-chain amino acids. *Kidney Int*. 1988;33(1):91-4.

68. Claris-Appiani A, Tirelli AS, Ardissino G, Dacco V, Moretto E, Corbetta C, et al. Hypotonic saline infusion alters the renal response to amino acids in men. *The American journal of physiology*. 1999;276(1 Pt 2):F137-42.
69. Claus BO, Hoste EA, Colpaert K, Robays H, Decruyenaere J, De Waele JJ. Augmented renal clearance is a common finding with worse clinical outcome in critically ill patients receiving antimicrobial therapy. *Journal of critical care*. 2013;28(5):695-700.
70. Coppo R, Porcellini MG, Gianoglio B, Alessi D, Peruzzi L, Amore A, et al. Glomerular permselectivity to macromolecules in reflux nephropathy: microalbuminuria during acute hyperfiltration due to aminoacid infusion. *Clin Nephrol*. 1993;40(6):299-307.
71. Cotroneo P, Manto A, Todaro L, Manto A, Jr., Pitocco D, Saponara C, et al. Hyperfiltration in patients with type I diabetes mellitus: a prevalence study. *Clin Nephrol*. 1998;50(4):214-7.
72. Cottiero RA, Madaio MP, Levey AS. Glomerular filtration rate and urinary albumin excretion rate in systemic lupus erythematosus. *Nephron*. 1995;69(2):140-6.
73. Dahl-Jorgensen K, Brinchmann-Hansen O, Hanssen KF. Effect of near normoglycaemia for two years on progression of early diabetic retinopathy, nephropathy, and neuropathy: The Oslo study. *British Medical Journal*. 1986;293(6556):1195-9.
74. Dahlquist G, Stattin EL, Rudberg S. Urinary albumin excretion rate and glomerular filtration rate in the prediction of diabetic nephropathy; A long-term follow-up study of childhood onset type-1 diabetic patients. *Nephrology Dialysis Transplantation*. 2001;16(7):1382-6.
75. Day TG, Drasar ER, Fulford T, Sharpe CC, Thein SL. Association between hemolysis and albuminuria in adults with sickle cell anemia. *Haematologica*. 2012;97(2):201-5.
76. De Azevedo MJ, Ramos OL, Gross JL. Renin-aldosterone axis in normoalbuminuric insulin-dependent diabetes mellitus patients with glomerular hyperfiltration. *Diabetes research and clinical practice*. 1995;27(3):205-10.
77. De Azevedo MJ, Ramos OL, Gross JL. Lack of effect of captopril on glomerular hyperfiltration in normoalbuminuric normotensive insulin-dependent diabetic patients. *Hormone and Metabolic Research*. 1997;29(10):516-9.
78. De Carvalho JA, Bochi GV, Sangoi MB, Moresco RN. Assessment of urinary gamma-glutamyltransferase in type 2 diabetic patients with glomerular hyperfiltration. *Clinica chimica acta; international journal of clinical chemistry*. 2012;413(7-8):817-8.
79. De Faria JBL. Renal functional response to protein loading in type 1 (insulin-dependent) diabetic patients on normal or high salt intake. *Nephron*. 1997;76(4):411-7.
80. de Paula RP, Nascimento AF, Sousa SM, Bastos PR, Barbosa AA. Glomerular filtration rate is altered in children with sickle cell disease: a comparison between Hb SS and Hb SC. *Revista brasileira de hematologia e hemoterapia*. 2013;35(5):349-51.
81. De Santo NG, Anastasio P, Loguercio C, del Vecchio Blanco C, Capasso G, Coppola S, et al. Glucagon-independent renal hyperaemia and hyperfiltration after an oral protein load in Child A liver cirrhosis. *European journal of clinical investigation*. 1992;22(1):31-7.
82. De Santo NG, Anastasio P, Spitali L, Cirillo M, Santoro D, Pollastro RM, et al. The renal hemodynamic response to an oral protein load is normal in IgA nephropathy. *Nephron*. 1997;76(4):406-10.
83. De Santo NG, Calo L, Coppola S, Anastasio P, Cantaro S, Favaro S, et al. Renal prostaglandins and thromboxane A2 lack a functional significance in the genesis of protein-induced glomerular hyperfiltration in human renal disease. *Nephron*. 1993;63(1):49-53.
84. De Santo NG, Capasso G, Anastasio P, Coppola S, Bellini L, Lombardi A. Brain-gut peptides and the renal hemodynamic response to an oral protein load: a study of gastrin, bombesin, and glucagon in man. *Renal physiology and biochemistry*. 1992;15(1):53-6.

85. Delles C, Klingbeil AU, Schneider MP, Handrock R, Weidinger G, Schmieder RE. Direct Comparison of the Effects of Valsartan and Amlodipine on Renal Hemodynamics in Human Essential Hypertension. *American journal of hypertension*. 2003;16(12):1030-5.
86. Dell'Omo G, Penno G, Giorgi D, Di Bello V, Mariani M, Pedrinelli R. Association between high-normal albuminuria and risk factors for cardiovascular and renal disease in essential hypertensive men. *American journal of kidney diseases : the official journal of the National Kidney Foundation*. 2002;40(1):1-8.
87. Dengel DR, Goldberg AP, Mayuga RS, Kairis GM, Weir MR. Insulin resistance, elevated glomerular filtration fraction, and renal injury. *Hypertension*. 1996;28(1):127-32.
88. DeSanto NG, Calo L, Anastasio P, Coppola S, Cantaro S, Favaro S, et al. Renal synthesis of prostaglandins and thromboxane has no causative role for protein-induced glomerular hyperfiltration in healthy humans. *Nephron*. 1994;66(1):45-51.
89. DeSanto NG, Capasso G, Anastasio P, Coppola S, DeTommaso G, Coscarella G, et al. Renal handling of sodium after an oral protein load in adult humans. *Renal physiology and biochemistry*. 1992;15(1):41-52.
90. Dhaene M, Sabot JP, Philippart Y, Doutrelepon JM, Vanherweghem JL. Effects of acute protein loads of different sources on glomerular filtration rate. *Kidney International*. 1987;32(SUPPL. 22):S-25-S-8.
91. Dimitrakov D, Kumchev E, Lyutakova E, Grigorov L. Glomerular hyperfiltration and serum beta 2-microglobulin used as early markers in diagnosis of autosomal dominant polycystic kidney disease. *Folia medica*. 1993;35(1-2):59-62.
92. Ditzel J. Glomerular hyperfiltration and blood viscosity in type I (insulin-dependent) diabetic subjects. *Diabete et Metabolisme*. 1984;10(1):7-11.
93. Dmitrova TB, Kotovskaia Iu V, Kobalava Zh D, Moiseev VS. [Possibilities of achieving target blood pressure in patients with essential hypertension in relation to renal functional status and age]. *Terapevticheskii arkhiv*. 2002;74(12):29-33.
94. Drummond K, Levy-Marchal C, Laborde K, Kindermans C, Wright C, Dechaux M, et al. Enalapril does not alter renal function in normotensive, normoalbuminuric, hyperfiltering Type 1 (insulin-dependent) diabetic children. *Diabetologia*. 1989;32(4):255-60.
95. Du Cailar G, Ribstein J, Mimran A. Glomerular hyperfiltration and left ventricular mass in mild never-treated essential hypertension. *Journal of Hypertension*. 1991;9(SUPPL. 6):S158-S9.
96. Ducic V, Grujic E. Diseases of the kidney in children and adolescents with insulin-dependent diabetes mellitus. *Acta medica Iugoslavica*. 1989;43(4):265-74.
97. Dullaart RP, Meijer S, Marbach P, Sluiter WJ. Effect of a somatostatin analogue, octreotide, on renal haemodynamics and albuminuria in acromegalic patients. *European journal of clinical investigation*. 1992;22(7):494-502.
98. Dura Trave T, Moya Benavent M, Casero Ariza J. Glomerular hyperfiltration, microalbuminuria and hypercalciuria in children with diabetes mellitus. *Endocrinologia*. 1992;39(4):118-22.
99. Eisenhauer T, Jungmann E, Warneboldt D, Ansoerge G, Scherberich J, Talartschik J. [Behavior of the renal functional reserve in type I diabetic patients: effect of ACE-inhibition]. *Klinische Wochenschrift*. 1990;68(15):750-7.
100. Ekberg G, Grefberg N, Larsson LO. Cigarette smoking and urinary albumin excretion in insulin-treated diabetics without manifest nephropathy. *Journal of internal medicine*. 1991;230(5):435-42.
101. Ekberg G, Grefberg N, Larsson LO, Vaara I. Cigarette smoking and glomerular filtration rate in insulin-treated diabetics without manifest nephropathy. *Journal of internal medicine*. 1990;228(3):211-7.
102. Ekberg G, Sjöfors G, Grefberg N, Larsson LO, Vaara I. Protein intake and glomerular hyperfiltration in insulin-treated diabetics without manifest nephropathy. *Scandinavian journal of urology and nephrology*. 1993;27(4):441-6.
103. Erben J, Smahelova A, Skaunic V. The effect of obesity on glomerular hyperfiltration as a sign of incipient diabetic nephropathy. *Vnitřní lékařství*. 1988;34(7):639-45.

104. Erley CM, Holzer M, Kramer BK, Risler T. Renal haemodynamics and organ damage in young hypertensive patients with different plasma renin activities after ACE inhibition. *Nephrology Dialysis Transplantation*. 1992;7(3):216-20.
105. Felip A, Bonet J, Galan A, Romero R. Response to oral protein load in diabetics with early nephropathy and patients with glomerulonephritis. *Nefrologia : publicacion oficial de la Sociedad Espanola Nefrologia*. 1998;18(1):42-8.
106. Ficociello LH, Perkins BA, Roshan B, Weinberg JM, Aschengrau A, Warram JH, et al. Renal hyperfiltration and the development of microalbuminuria in type 1 diabetes. *Diabetes Care*. 2009;32(5):889-93.
107. Fioretto P, Sambataro M, Cipollina MR, Giorato C, Carraro A, Opocher G, et al. Role of atrial natriuretic peptide in the pathogenesis of sodium retention in IDDM with and without glomerular hyperfiltration. *Diabetes*. 1992;41(8):936-45.
108. Fontserè N, Bonal J, Salinas I, de Arellano MR, Rios J, Torres F, et al. Is the new Mayo Clinic Quadratic equation useful for the estimation of glomerular filtration rate in type 2 diabetic patients? *Diabetes Care*. 2008;31(12):2265-7.
109. Fontserè N, Salinas I, Bonal J, Bayes B, Riba J, Torres F, et al. Are prediction equations for glomerular filtration rate useful for the long-term monitoring of type 2 diabetic patients? *Nephrology, dialysis, transplantation : official publication of the European Dialysis and Transplant Association - European Renal Association*. 2006;21(8):2152-8.
110. Francischetti EA, Barroso I, da Silva A, Fagundes VG. Effects of long-term administration of isradipine on renal hemodynamics and sodium metabolism. *Journal of cardiovascular pharmacology*. 1992;19 Suppl 3:S90-2.
111. Frankfurt JA, Duncan AF, Heyne RJ, Rosenfeld CR. Renal function and systolic blood pressure in very-low-birth-weight infants 1-3 years of age. *Pediatric nephrology (Berlin, Germany)*. 2012;27(12):2285-91.
112. Friedlander G, Blanchet-Benque F, Nitenberg A, Laborie C, Assan R, Amiel C. Glucagon secretion is essential for aminoacid-induced hyperfiltration in man. *Nephrology, dialysis, transplantation : official publication of the European Dialysis and Transplant Association - European Renal Association*. 1990;5(2):110-7.
113. Friedman AN, Quinney SK, Inman M, Mattar SG, Shihabi Z, Moe S. Influence of dietary protein on glomerular filtration before and after bariatric surgery: A cohort study. *American Journal of Kidney Diseases*. 2014;63(4):598-603.
114. Friedman AN, Yu Z, Juliar BE, Nguyen JT, Strother M, Quinney SK, et al. Independent influence of dietary protein on markers of kidney function and disease in obesity. *Kidney International*. 2010;78(7):693-7.
115. Fu WJ, Fang YG, Deng RT, Wen S, Chen ML, Huang ZH, et al. Correlation of high urinary Smad1 level with glomerular hyperfiltration in type 2 diabetes mellitus. *Endocrine*. 2013;43(2):346-50.
116. Fu WJ, Li BL, Wang SB, Chen ML, Deng RT, Ye CQ, et al. Changes of the tubular markers in type 2 diabetes mellitus with glomerular hyperfiltration. *Diabetes research and clinical practice*. 2012;95(1):105-9.
117. Fuster-Lluch O, Geronimo-Pardo M, Peyro-Garcia R, Lizan-Garcia M. Glomerular hyperfiltration and albuminuria in critically ill patients. *Anaesthesia and intensive care*. 2008;36(5):674-80.
118. Futrakul N, Vongthavarawat V, Sirisalipotch S, Chairatanarat T, Futrakul P, Suwanwalaikorn S. Tubular dysfunction and hemodynamic alteration in normoalbuminuric type 2 diabetes. *Clinical hemorheology and microcirculation*. 2005;32(1):59-65.
119. Gerchman F, Tong J, Utzschneider KM, Zraika S, Udayasankar J, McNeely MJ, et al. Body mass index is associated with increased creatinine clearance by a mechanism independent of body fat distribution. *Journal of Clinical Endocrinology and Metabolism*. 2009;94(10):3781-8.
120. Gornostaeva E, Novikova MS, Beloborodova AV, Akarachkova ES, Shilov EM, Shvarkov SB. [Autonomic imbalance in patients with metabolic syndrome: role in the development of hyperfiltration--an early marker of renal lesions]. *Terapevticheskii arkhiv*. 2010;82(6):49-53.



121. Gragnoli G, Signorini AM, Tanganelli I, Fondelli C, Borgogni P, Borgogni L, et al. Prevalence of glomerular hyperfiltration and nephromegaly in normo- and microalbuminuric type 2 diabetic patients. *Nephron*. 1993;65(2):206-11.
122. Groop PH, Thomas MC, Moran JL, Waden J, Thorn LM, Makinen VP, et al. The presence and severity of chronic kidney disease predicts all-cause mortality in type 1 diabetes. *Diabetes*. 2009;58(7):1651-8.
123. Gumus, II, Uz E, Bavbek N, Kargili A, Yanik B, Turgut FH, et al. Does glomerular hyperfiltration in pregnancy damage the kidney in women with more parities? *International urology and nephrology*. 2009;41(4):927-32.
124. Hadj-Aissa A, Bankir L, Fraysse M, Bichet DG, Laville M, Zech P, et al. Influence of the level of hydration on the renal response to a protein meal. *Kidney Int*. 1992;42(5):1207-16.
125. Haneda M, Kikkawa R, Ebata K, Sugimoto T, Shigeta Y. [Measurement of renal plasma flow and glomerular filtration rates in diabetic subjects]. *Rinsho byori The Japanese journal of clinical pathology*. 1992;40(7):692-6.
126. Hansen KW, Mau Pedersen M, Christensen CK, Schmitz A, Christiansen JS, Mogensen CE. Normoalbuminuria ensures no reduction of renal function in type 1 (insulin-dependent) diabetic patients. *Journal of internal medicine*. 1992;232(2):161-7.
127. Hansen KW, Pedersen MM, Christiansen JS, Mogensen CE. Acute renal effects of angiotensin converting enzyme inhibition in microalbuminuric type 1 diabetic patients. *Acta diabetologica*. 1993;30(3):149-53.
128. Har R, Scholey JW, Daneman D, Mahmud FH, Dekker R, Lai V, et al. The effect of renal hyperfiltration on urinary inflammatory cytokines/chemokines in patients with uncomplicated type 1 diabetes mellitus. *Diabetologia*. 2013;56(5):1166-73.
129. Harrap SB, Cumming AD, Davies DL, Foy CJ, Fraser R, Kamitani A, et al. Glomerular hyperfiltration, high renin, and low- extracellular volume in high blood pressure. *Hypertension*. 2000;35(4):952-7.
130. Harvey JN, Edmundson AW, Jaffa AA, Martin LL, Mayfield RK. Renal excretion of kallikrein and eicosanoids in patients with Type 1 (insulin-dependent) diabetes mellitus. Relationship to glomerular and tubular function. *Diabetologia*. 1992;35(9):857-62.
131. Haymann JP, Stankovic K, Levy P, Avellino V, Tharaux PL, Letavernier E, et al. Glomerular hyperfiltration in adult sickle cell anemia: A frequent hemolysis associated feature. *Clinical Journal of the American Society of Nephrology*. 2010;5(5):756-61.
132. Heering P, Bach D, Niederau C, Grabensee B. Functional reserve capacity in patients with IgA glomerulopathy. *Nieren- und Hochdruckkrankheiten*. 1994;23(11):575-9.
133. Heering P, Wyes D, Plum J, Grabensee B. Influence of the renin-angiotensin system and atrial natriuretic peptide on renal functional reserve. *Nephron*. 1994;66(1):14-20.
134. Helal I, Reed B, Schrier RW. Emergent early markers of renal progression in autosomal-dominant polycystic kidney disease patients: Implications for prevention and treatment. *American Journal of Nephrology*. 2012;36(2):162-7.
135. Hellerstein S, Berenbom M, Erwin P, Wilson N, DiMaggio S. Measurement of renal functional reserve in children. *Pediatric Nephrology*. 2004;19(10):1132-6.
136. Hernandez-Marco R, Codoner-Franch P, Pons Morales S, Del Castillo Villaescusa C, Boix Garcia L, Valls Belles V. Oxidant/antioxidant status and hyperfiltration in young patients with type 1 diabetes mellitus. *Pediatric nephrology (Berlin, Germany)*. 2009;24(1):121-7.
137. Herrera J, Rodriguez-Iturbe B, Parra G, Coello J, Garcia R, Colina-Chourio J, et al. Urinary prostaglandin E and kallikrein activity in glomerular hyperfiltration induced by a meat meal in man. *Clinical Nephrology*. 1988;30(3):151-7.
138. Hjorth L, Wiebe T, Karpman D. Hyperfiltration evaluated by glomerular filtration rate at diagnosis in children with cancer. *Pediatric blood & cancer*. 2011;56(5):762-6.

139. Hladunewich MA, Lafayette RA, Derby GC, Blouch KL, Bialek JW, Druzin ML, et al. The dynamics of glomerular filtration in the puerperium. *American Journal of Physiology - Renal Physiology*. 2004;286(3 55-3):F496-F503.
140. Hohenstein B, Hugo CP, Hausknecht B, Boehmer KP, Riess RH, Schmieder RE. Analysis of NO-synthase expression and clinical risk factors in human diabetic nephropathy. *Nephrology, dialysis, transplantation : official publication of the European Dialysis and Transplant Association - European Renal Association*. 2008;23(4):1346-54.
141. Hou CC, Shyu RS, Lee WJ, Ser KH, Lee YC, Chen SC. Improved renal function 12 months after bariatric surgery. *Surgery for obesity and related diseases : official journal of the American Society for Bariatric Surgery*. 2013;9(2):202-6.
142. Houlihan C, Jenkins M, Osicka T, Scott A, Parkin D, Jerums G. A comparison of the plasma disappearance of iohexol and <sup>99m</sup>Tc-DTPA for the measurement of glomerular filtration rate (GFR) in diabetes. *Australian and New Zealand journal of medicine*. 1999;29(5):693-700.
143. Huttunen NP, Knip M, Kaar ML, Puukka R, Akerblom HK. Clinical significance of urinary C-peptide excretion in children with insulin-dependent diabetes mellitus. *Acta paediatrica Scandinavica*. 1989;78(2):271-7.
144. Ishida K, Ishibashi F, Takashina S. Comparison of renal hemodynamics in early non-insulin-dependent and insulin-dependent diabetes mellitus. *The Journal of diabetic complications*. 1991;5(2-3):143-5.
145. Ishizaka N, Ishizaka Y, Toda E, Shimomura H, Koike K, Seki G, et al. Association between cigarette smoking and chronic kidney disease in Japanese men. *Hypertension research : official journal of the Japanese Society of Hypertension*. 2008;31(3):485-92.
146. Jacobs EM, Vervoort G, Branten AJ, Klasen I, Smits P, Wetzels JF. Atrial natriuretic peptide increases albuminuria in type I diabetic patients: evidence for blockade of tubular protein reabsorption. *European journal of clinical investigation*. 1999;29(2):109-15.
147. Jacobs ML, Derkx FH, Stijnen T, Lamberts SW, Weber RF. Effect of long-acting somatostatin analog (Somatulin) on renal hyperfiltration in patients with IDDM. *Diabetes Care*. 1997;20(4):632-6.
148. Janssen JA, Jacobs ML, Derkx FH, Weber RF, van der Lely AJ, Lamberts SW. Free and total insulin-like growth factor I (IGF-I), IGF-binding protein-1 (IGFBP-1), and IGFBP-3 and their relationships to the presence of diabetic retinopathy and glomerular hyperfiltration in insulin-dependent diabetes mellitus. *The Journal of clinical endocrinology and metabolism*. 1997;82(9):2809-15.
149. Javor ED, Moran SA, Young JR, Cochran EK, DePaoli AM, Oral EA, et al. Proteinuric nephropathy in acquired and congenital generalized lipodystrophy: baseline characteristics and course during recombinant leptin therapy. *The Journal of clinical endocrinology and metabolism*. 2004;89(7):3199-207.
150. Jenkins DA, Craig K, Collier A, Watson ML, Clarke BF. Evidence against a role for prostaglandins in sustaining renal hyperfiltration in type 1 diabetes mellitus. *Diabetic medicine : a journal of the British Diabetic Association*. 1989;6(6):502-5.
151. Jesudason DR, Pedersen E, Clifton PM. Weight-loss diets in people with type 2 diabetes and renal disease: a randomized controlled trial of the effect of different dietary protein amounts. *American Journal of Clinical Nutrition*. 2013;98(2):494-501.
152. Jin Y, Moriya T, Tanaka K, Matsubara M, Fujita Y. Glomerular hyperfiltration in non-proteinuric and non-hypertensive Japanese type 2 diabetic patients. *Diabetes research and clinical practice*. 2006;71(3):264-71.
153. Jones SL, Kontessis P, Wiseman M, Dodds R, Boggetti E, Pinto J, et al. Protein intake and blood glucose as modulators of GFR in hyperfiltering diabetic patients. *Kidney International*. 1992;41(6):1620-8.
154. Jones SL, Wiseman MJ, Viberti GC. Glomerular hyperfiltration as a risk factor for diabetic nephropathy: Five-year report of a prospective study. *Diabetologia*. 1991;34(1):59-60.
155. Juhl B, Klein F, Christiansen JS. Unchanged glomerular hyperfiltration following 3 months of aldose reductase inhibition with tolrestat in normoalbuminuric IDDM patients. *Endocrinology and Metabolism*. 1997;4(5):305-11.

156. Juraschek SP, Appel LJ, Anderson CA, Miller ER, 3rd. Effect of a high-protein diet on kidney function in healthy adults: results from the OmniHeart trial. *American journal of kidney diseases : the official journal of the National Kidney Foundation*. 2013;61(4):547-54.
157. Kalk WJ, Osler C, Constable J, Kruger M, Panz V. Influence of dietary protein on glomerular filtration and urinary albumin excretion in insulin-dependent diabetes. *American Journal of Clinical Nutrition*. 1992;56(1):169-73.
158. Kalk WJ, Osler C, Taylor D, Panz VR, Esse JD, Reinach SG. The prevalence of micro-albuminuria and glomerular hyperfiltration in young patients with IDDM. *Diabetes research and clinical practice*. 1990;8(2):145-53.
159. Kandasamy Y, Smith R, Wright IM, Lumbers ER. Relationships between glomerular filtration rate and kidney volume in low-birth-weight neonates. *Journal of nephrology*. 2013;26(5):894-8.
160. Keller CK, Bergis KH, Fliser D, Ritz E. Renal findings in patients with short-term type 2 diabetes. *Journal of the American Society of Nephrology : JASN*. 1996;7(12):2627-35.
161. Khalil CA, Travert F, Fetita S, Rouzet F, Porcher R, Riveline JP, et al. Fetal exposure to maternal type 1 diabetes is associated with renal dysfunction at adult age. *Diabetes*. 2010;59(10):2631-6.
162. Kimura G, Uzu T, Nakamura S, Inenaga T, Fujii T. High sodium sensitivity and glomerular hypertension/hyperfiltration in primary aldosteronism. *Journal of Hypertension*. 1996;14(12):1463-8.
163. Kinebuchi S, Kazama JJ, Satoh M, Sakai K, Nakayama H, Yoshizawa H, et al. Short-term use of continuous positive airway pressure ameliorates glomerular hyperfiltration in patients with obstructive sleep apnoea syndrome. *Clinical science (London, England : 1979)*. 2004;107(3):317-22.
164. King L, MooSang M, Miller M, Reid M. Prevalence and predictors of microalbuminuria in Jamaican children with sickle cell disease. *Archives of Disease in Childhood*. 2011;96(12):1135-9.
165. Klein F, Juhl B, Christiansen JS. Unchanged renal haemodynamics following high dose ascorbic acid administration in normoalbuminuric IDDM patients. *Scandinavian journal of clinical and laboratory investigation*. 1995;55(1):53-9.
166. Koetje PM, Spaan JJ, Kooman JP, Spaanderman ME, Peeters LL. Pregnancy reduces the accuracy of the estimated glomerular filtration rate based on Cockcroft-Gault and MDRD formulas. *Reproductive sciences (Thousand Oaks, Calif)*. 2011;18(5):456-62.
167. Korpachev VV, Hurina NM, Korpacheva TI, Shuprovych AA, Mosendz IO. [Peculiarities of uric acid balance disorders in patients with type 2 diabetes and metabolic syndrome]. *Fiziolohichniy zhurnal (Kiev, Ukraine : 1994)*. 2009;55(3):133-40.
168. Kotchen TA, Piering AW, Cowley AW, Grim CE, Gaudet D, Hamet P, et al. Glomerular hyperfiltration in hypertensive African Americans. *Hypertension*. 2000;35(3):822-6.
169. Kralickova P, Melichar B, Malir F, Roubal T. Renal tubular dysfunction and urinary zinc excretion in breast cancer patients treated with anthracycline-based combination chemotherapy. *Journal of experimental & clinical cancer research : CR*. 2004;23(4):579-84.
170. Krikken JA, Lely AT, Bakker SJ, Navis G. The effect of a shift in sodium intake on renal hemodynamics is determined by body mass index in healthy young men. *Kidney International*. 2007;71(3):260-5.
171. Krishna GG, Newell G, Miller E, Heeger P, Smith R, Polansky M, et al. Protein-induced glomerular hyperfiltration: Role of hormonal factors. *Kidney International*. 1988;33(2):578-83.
172. Kubo M, Kiyohara Y, Kato I, Iwamoto H, Nakayama K, Hirakata H, et al. Effect of hyperinsulinemia on renal function in a general Japanese population: the Hisayama study. *Kidney Int*. 1999;55(6):2450-6.
173. Kumar M, Kedar A, Neiberger RE. Kidney function in long-term pediatric survivors of acute lymphoblastic leukemia following allogeneic bone marrow transplantation. *Pediatric hematology and oncology*. 1996;13(4):375-9.

174. Laborde K, Levy-Marchal C, Kindermans C, Dechaux M, Czernichow P, Sachs C. Glomerular function and microalbuminuria in children with insulin-dependent diabetes. *Pediatric nephrology (Berlin, Germany)*. 1990;4(1):39-43.
175. Lafayette RA, Malik T, Druzin M, Derby G, Myers BD. The dynamics of glomerular filtration after Caesarean section. *Journal of the American Society of Nephrology*. 1999;10(7):1561-5.
176. Lalau JD, Westeel PF, Tenenbaum F, Debussche X, Nussberger J, Tribout B, et al. Natriuretic and vasoactive hormones and glomerular hyperfiltration in hyperglycaemic type 2 diabetic patients: Effect of insulin treatment. *Nephron*. 1993;63(3):296-302.
177. Lebovitz HE, Palmisano J. Cross-sectional analysis of renal function in black Americans with NIDDM. *Diabetes Care*. 1990;13(11):1186-90.
178. Lee HC, Mitchell HC, Van Dreal P, Pettinger WA. Hyperfiltration and conservation of renal function in hypertensive nephrosclerosis patients. *American Journal of Kidney Diseases*. 1993;21(4 SUPPL. 1):68-74.
179. Lee KU, Park JY, Hwang IR, Hong SK, Kim GS, Moon DH, et al. Glomerular hyperfiltration in Koreans with non-insulin-dependent diabetes mellitus. *American Journal of Kidney Diseases*. 1995;26(5):722-6.
180. Lee PJ, Dalton RN, Shah V, Hindmarsh PC, Leonard JV. Glomerular and tubular function in glycogen storage disease. *Pediatric Nephrology*. 1995;9(6):705-10.
181. Lervang HH, Jensen S, Brochner-Mortensen J, Ditzel J. Early glomerular hyperfiltration and the development of late nephropathy in Type 1 (insulin-dependent) diabetes mellitus. *Diabetologia*. 1988;31(10):723-9.
182. Lervang HH, Jensen S, Brochner-Mortensen J, Ditzel J. Does increased glomerular filtration rate or disturbed tubular function early in the course of childhood Type 1 diabetes predict the development of nephropathy? *Diabetic Medicine*. 1992;9(7):635-40.
183. Levine DZ. Hyperfiltration, nitric oxide, and diabetic nephropathy. *Current hypertension reports*. 2006;8(2):153-7.
184. Levitt NS, Adams G, Salmon J, Marks IN, Musson G, Swanepoel C, et al. The prevalence and severity of microvascular complications in pancreatic diabetes and IDDM. *Diabetes Care*. 1995;18(7):971-4.
185. Levy-Marchal C, Laborde K, Kindermans C, Dechaux M. Persisting glomerular hyperfiltration in short-term diabetic children without microalbuminuria. *Acta paediatrica Scandinavica*. 1989;78(5):712-6.
186. Linne T, Korner A, Rudberg S, Persson B, Aperia A. Renal functional effects of prostaglandin synthesis inhibition in patients with insulin-dependent diabetes mellitus of long duration without nephropathy. *Hormone and metabolic research = Hormon- und Stoffwechselforschung = Hormones et metabolisme*. 1991;23(8):383-6.
187. Losito A, Fortunati F, Zampi I, Del Favero A. Impaired renal functional reserve and albuminuria in essential hypertension. *British Medical Journal*. 1988;296(6636):1562-4.
188. Losito A, Zampi I, Fortunati I, del Favero A. Glomerular hyperfiltration and albuminuria in essential hypertension. *Nephron*. 1988;49(1):84-5.
189. Luaces M, Martinez-Martinez E, Medina M, Miana M, Gonzalez N, Fernandez-Perez C, et al. The impact of bariatric surgery on renal and cardiac functions in morbidly obese patients. *Nephrology, dialysis, transplantation : official publication of the European Dialysis and Transplant Association - European Renal Association*. 2012;27 Suppl 4:iv53-7.
190. Luik PT, Hoogenberg K, Van Der Kleij FG, Beusekamp BJ, Kerstens MN, De Jong PE, et al. Short-term moderate sodium restriction induces relative hyperfiltration in normotensive normoalbuminuric Type I diabetes mellitus. *Diabetologia*. 2002;45(4):535-41.
191. Luippold G, Schneider S, Stefanescu A, Benohr P, Muhlbauer B. Dopamine D2-like receptors and amino acid-induced glomerular hyperfiltration in humans. *British journal of clinical pharmacology*. 2001;51(5):415-21.

192. Maeda I, Hayashi T, Sato KK, Koh H, Harita N, Nakamura Y, et al. Cigarette smoking and the association with glomerular hyperfiltration and proteinuria in healthy middle-aged men. *Clinical Journal of the American Society of Nephrology*. 2011;6(10):2462-9.
193. Magri CJ, Fava S. Albuminuria and glomerular filtration rate in type 2 diabetes mellitus. *Minerva urologica e nefrologica = The Italian journal of urology and nephrology*. 2011;63(4):273-80.
194. Malaki M, Sorkhabi RS, Shoaran M, Shafiqhe B. Beta thalassemia major: the effect of age on glomerular filtration rate. *Saudi journal of kidney diseases and transplantation : an official publication of the Saudi Center for Organ Transplantation, Saudi Arabia*. 2011;22(5):963-8.
195. Mallamaci F, Leonardis D, Bellizzi V, Zoccali C. Does high salt intake cause hyperfiltration in patients with essential hypertension? *Journal of human hypertension*. 1996;10(3):157-61.
196. Mammen C, Al Abbas A, Skippen P, Nadel H, Levine D, Collet JP, et al. Long-term Risk of CKD in Children Surviving Episodes of Acute Kidney Injury in the Intensive Care Unit: A Prospective Cohort Study. *American Journal of Kidney Diseases*. 2012;59(4):523-30.
197. Mansy H, Goodship TH, Tapson JS, Hartley GH, Keavey P, Wilkinson R. Effect of a high protein diet in patients with the nephrotic syndrome. *Clinical science (London, England : 1979)*. 1989;77(4):445-51.
198. Manto A, Cotroneo P, Porcelli G, D'Errico G, Marra G, Magnani P, et al. Urinary kallikrein excretion in type 1 (insulin-dependent) diabetes mellitus. *Diabetologia*. 1993;36(5):423-7.
199. Marcovecchio ML, Dalton RN, Turner C, Prevost AT, Widmer B, Amin R, et al. Symmetric dimethylarginine, an endogenous marker of glomerular filtration rate, and the risk for microalbuminuria in young people with type 1 diabetes. *Archives of Disease in Childhood*. 2010;95(2):119-24.
200. Marouf R, Mojiminiyi O, Abdella N, Kortom M, Al Wazzan H. Comparison of renal function markers in Kuwaiti patients with sickle cell disease. *Journal of clinical pathology*. 2006;59(4):345-51.
201. Marre M, Hallab M, Roy J, Lejeune JJ, Jallet P, Fressinaud P. Glomerular hyperfiltration in type I, type II, and secondary diabetes. *Journal of diabetes and its complications*. 1992;6(1):19-24.
202. Martens DH, Rake JP, Navis G, Fidler V, van Dael CM, Smit GP. Renal function in glycogen storage disease type I, natural course, and renopreservative effects of ACE inhibition. *Clinical journal of the American Society of Nephrology : CJASN*. 2009;4(11):1741-6.
203. Marzano MA, Pompili M, Rapaccini GL, Covino M, Cotroneo P, Manto A, et al. Early renal involvement in diabetes mellitus: Comparison of renal Doppler US and radioisotope evaluation of glomerular hyperfiltration. *Radiology*. 1998;209(3):813-7.
204. Matteucci E, Rossi L, Mariani S, Fagnani F, Quilici S, Cinapri V, et al. Blood levels of total homocysteine in patients with type 1 diabetes (with no complications, diabetic nephropathy and/or retinopathy) and in their non-diabetic relatives. *Nutrition, metabolism, and cardiovascular diseases : NMCD*. 2002;12(4):184-9.
205. Mauer M, Drummond K. The early natural history of nephropathy in type 1 diabetes: I. Study design and baseline characteristics of the study participants. *Diabetes*. 2002;51(5):1572-9.
206. McCarville MB, Luo Z, Huang X, Rees RC, Rogers ZR, Miller ST, et al. Abdominal ultrasound with scintigraphic and clinical correlates in infants with sickle cell anemia: baseline data from the BABY HUG trial. *AJR American journal of roentgenology*. 2011;196(6):1399-404.
207. Meeme A, Kasozi H. Effect of glycaemic control on glomerular filtration rate in diabetes mellitus patients. *African health sciences*. 2009;9 Suppl 1:S23-6.
208. Melis D, Parenti G, Gatti R, Casa RD, Parini R, Riva E, et al. Efficacy of ACE-inhibitor therapy on renal disease in glycogen storage disease type 1: a multicentre retrospective study. *Clinical endocrinology*. 2005;63(1):19-25.
209. Melsom T, Mathisen UD, Eilertsen BA, Ingebretsen OC, Jenssen T, Njolstad I, et al. Physical exercise, fasting glucose, and renal hyperfiltration in the general population: the Renal Iohexol Clearance Survey in Tromsø 6 (RENIS-T6). *Clinical journal of the American Society of Nephrology : CJASN*. 2012;7(11):1801-10.

210. Melsom T, Mathisen UD, Ingebretsen OC, Jenssen TG, Njolstad I, Solbu MD, et al. Impaired fasting glucose is associated with renal hyperfiltration in the general population. *Diabetes Care*. 2011;34(7):1546-51.
211. Miller JA, Curtis JR, Sochett EB. Relationship between diurnal blood pressure, renal hemodynamic function, and the renin-angiotensin system in type 1 diabetes. *Diabetes*. 2003;52(7):1806-11.
212. Miltenyi M, Szabo A, Tulassay T, Korner A, Kenesei E, Dobos M. Reduced glomerular filtration and elevated urinary protein excretion in diabetic ketoacidosis. *Acta paediatrica Scandinavica*. 1990;79(4):444-7.
213. Mimran A, Ribstein J, DuCailar G, Halimi JM. Hyperfiltration in lean essential hypertension. *Contributions to nephrology*. 1996;119:98-102.
214. Mizuiri S, Fushimi T, Nakanishi T, Nagasaki N, Kobayashi M, Tanaka T, et al. Amino acid-induced hyperfiltration--mediators and effect of captopril. *Clin Nephrol*. 1994;42(1):38-43.
215. Mocan Z, Erem C, Yildirim M, Telatar M, Deger O. Urinary beta 2-microglobulin levels and urinary N-acetyl-beta-D-glucosaminidase enzyme activities in early diagnosis of non-insulin-dependent diabetes mellitus nephropathy. *Diabetes research (Edinburgh, Lothian)*. 1994;26(3):101-7.
216. Mogensen CE. Early glomerular hyperfiltration in insulin-dependent diabetics and late nephropathy. *Scandinavian journal of clinical and laboratory investigation*. 1986;46(3):201-6.
217. Mogensen CE, Christensen CK, Pedersen MM, Alberti KG, Boye N, Christensen T, et al. Renal and glycemic determinants of glomerular hyperfiltration in normoalbuminuric diabetics. *The Journal of diabetic complications*. 1990;4(4):159-65.
218. Monami M, Pala L, Bardini G, Francesconi P, Cresci B, Marchionni N, et al. Glomerular hyperfiltration and metabolic syndrome: Results from the Firenze-BAGno A Ripoli (FIBAR) Study. *Acta diabetologica*. 2009;46(3):191-6.
219. Monster TB, de Jong PE, de Jong-van den Berg LT. Drug-induced renal function impairment: a population-based survey. *Pharmacoepidemiology and drug safety*. 2003;12(2):135-43.
220. Montanari A, Biggi A, Cabassi A, Pelloni I, Pigazzani F, Pinelli S, et al. Renal hemodynamic response to L-arginine in uncomplicated, type 1 diabetes mellitus: the role of buffering anions and tubuloglomerular feedback. *American journal of physiology Renal physiology*. 2012;303(5):F648-58.
221. Montini G, Sacchetto E, Murer L, Dall'Amico R, Masiero M, Passerini-Glazel G, et al. Renal glomerular response to the inhibition of prostaglandin E2 synthesis and protein loading after the relief of unilateral ureteropelvic junction obstruction. *Journal of Urology*. 2000;163(2):556-60.
222. Moran P, Baylis PH, Lindheimer MD, Davison JM. Glomerular ultrafiltration in normal and preeclamptic pregnancy. *Journal of the American Society of Nephrology : JASN*. 2003;14(3):648-52.
223. Moriya T, Tsuchiya A, Okizaki S, Hayashi A, Tanaka K, Shichiri M. Glomerular hyperfiltration and increased glomerular filtration surface are associated with renal function decline in normo- and microalbuminuric type 2 diabetes. *Kidney International*. 2012;81(5):486-93.
224. Morrone LF, Ramunni A, Fassianos E, Saracino A, Coratelli P, Passavanti G. Nitrendipine and amlodipine mimic the acute effects of enalapril on renal haemodynamics and reduce glomerular hyperfiltration in patients with chronic kidney disease. *Journal of human hypertension*. 2003;17(7):487-93.
225. Muller D, Sievers E, Eggert P. Influence of hyperfiltration on the measurement of urinary N-acetyl-beta-D-glucosaminidase. *Pediatric nephrology (Berlin, Germany)*. 1999;13(6):519-23.
226. Myers BD, Nelson RG, Williams GW, Bennett PH, Hardy SA, Berg RL, et al. Glomerular function in Pima Indians with noninsulin-dependent diabetes mellitus of recent onset. *The Journal of clinical investigation*. 1991;88(2):524-30.
227. Nair KS, Pabico RC, Truglia JA, McKenna BA, Statt M, Lockwood DH. Mechanism of glomerular hyperfiltration after a protein meal in humans. Role of hormones and amino acids. *Diabetes Care*. 1994;17(7):711-5.
228. Nakamura H, Ito S, Ebe N, Shibata A. Renal effects of different types of protein in healthy volunteer subjects and diabetic patients. *Diabetes Care*. 1993;16(8):1071-5.

229. Nakamura H, Takasawa M, Kashara S, Tsuda A, Momotsu T, Ito S, et al. Effects of acute protein loads of different sources on renal function of patients with diabetic nephropathy. *The Tohoku journal of experimental medicine*. 1989;159(2):153-62.
230. Nakamura H, Yamazaki M, Chiba Y, Tamura N, Momotsu T, Ito S, et al. Glomerular filtration response to acute loading with protein from different sources in healthy volunteers and diabetic patients. *The Tohoku journal of experimental medicine*. 1990;162(3):269-78.
231. Nelson RG, Tan M, Beck GJ, Bennett PH, Knowler WC, Mitch WE, et al. Changing glomerular filtration with progression from impaired glucose tolerance to Type II diabetes mellitus. *Diabetologia*. 1999;42(1):90-3.
232. Neto AS, Rossi FMB, Dal Moro Amarante R, Buriti NA, Saheb GCB, Rossi M. Effect of weight loss after Roux-en-Y gastric bypass, on renal function and blood pressure in morbidly obese patients. *Journal of nephrology*. 2009;22(5):637-46.
233. New JP, Marshall SM, Bilous RW. Renal autoregulation is normal in newly diagnosed, normotensive, NIDDM patients. *Diabetologia*. 1998;41(2):206-11.
234. Ng DK, Jacobson LP, Brown TT, Paella FJ, Jr., Martinson JJ, Bolan R, et al. HIV therapy, metabolic and cardiovascular health are associated with glomerular hyperfiltration among men with and without HIV infection. *AIDS (London, England)*. 2014;28(3):377-86.
235. Nielsen S, Hove KY, Dollerup J, Poulsen PL, Christiansen JS, Schmitz O, et al. Losartan modifies glomerular hyperfiltration and insulin sensitivity in type 1 diabetes. *Diabetes, Obesity and Metabolism*. 2001;3(6):463-71.
236. Nistrup Holmegaard S, Christoffersen H, Haase J. Albuminuria, intermittent hyperfiltration and salt wasting in patients with stroke: a pilot study. *Scandinavian journal of clinical and laboratory investigation*. 2006;66(5):437-49.
237. Nordgren H, Freyschuss U, Persson B. Blood pressure response to physical exercise in healthy adolescents and adolescents with insulin-dependent diabetes mellitus. *Clinical Science*. 1994;86(4):425-32.
238. Norgaard K, Jensen T, Skott P, Thorsteinsson B, Bruun NE, Giese J, et al. Effects of insulin on renal haemodynamics and sodium handling in normal subjects. *Scandinavian journal of clinical and laboratory investigation*. 1991;51(4):367-76.
239. Novikova MS, Shilov EM, Borisov VV. [Hyperfiltration--early sign of chronic renal disease development in males with metabolic syndrome]. *Terapevticheskii arkhiv*. 2010;82(4):52-6.
240. Nowack R, Raum E, Blum W, Ritz E. Renal hemodynamics in recent-onset type II diabetes. *American Journal of Kidney Diseases*. 1992;20(4):342-7.
241. Nyberg E, Bohman SO, Berg U. Glomerular volume and renal function in children with different types of the nephrotic syndrome. *Pediatric nephrology (Berlin, Germany)*. 1994;8(3):285-9.
242. Odotola TA, Mabadeje AF, Mabayoje MO. Effect of diabetes mellitus on glomerular filtration rate in an urban hospital diabetic population. *African journal of medicine and medical sciences*. 1997;26(1-2):19-21.
243. Ohashi H, Oda H, Ohno M, Watanabe S. [Weight reduction improves high blood pressure and microalbuminuria in hypertensive patients with obesity]. *Nihon Jinzo Gakkai shi*. 2001;43(4):333-9.
244. Okada R, Yasuda Y, Tsushita K, Wakai K, Hamajima N, Matsuo S. Glomerular hyperfiltration in prediabetes and prehypertension. *Nephrology, dialysis, transplantation : official publication of the European Dialysis and Transplant Association - European Renal Association*. 2012;27(5):1821-5.
245. Okada R, Yasuda Y, Tsushita K, Wakai K, Hamajima N, Matsuo S. The number of metabolic syndrome components is a good risk indicator for both early- and late-stage kidney damage. *Nutrition, metabolism, and cardiovascular diseases : NMCD*. 2014;24(3):277-85.
246. Oterdoom LH, de Vries AP, Gansevoort RT, de Jong PE, Gans RO, Bakker SJ. Fasting insulin modifies the relation between age and renal function. *Nephrology, dialysis, transplantation : official publication of the European Dialysis and Transplant Association - European Renal Association*. 2007;22(6):1587-92.

247. Paiva H, Lehtimäki T, Laakso J, Ruukonen I, Rantalaiho V, Wirta O, et al. Plasma concentrations of asymmetric-dimethyl-arginine in type 2 diabetes associate with glycemic control and glomerular filtration rate but not with risk factors of vasculopathy. *Metabolism: clinical and experimental*. 2003;52(3):303-7.
248. Palatini P, De Toni R, Zaninotto M, Santonastaso M, Mos L, Cozzio S. Cystatin C as predictor of microalbuminuria in the early stage of hypertension. *Journal of Clinical Hypertension*. 2009;11(4):A9-A10.
249. Palatini P, Dorigatti F, Saladini F, Benetti E, Mos L, Mazzer A, et al. Factors associated with glomerular hyperfiltration in the early stage of hypertension. *American journal of hypertension*. 2012;25(9):1011-6.
250. Palatini P, Mormino P, Dorigatti F, Santonastaso M, Mos L, De Toni R, et al. Glomerular hyperfiltration predicts the development of microalbuminuria in stage 1 hypertension: the HARVEST. *Kidney International*. 2006;70(3):578-84.
251. Palatini P, Mormino P, Mos L, Mazzer A, Dorigatti F, Zanata G, et al. Microalbuminuria, renal function and development of sustained hypertension: A longitudinal study in the early stage of hypertension. *Journal of Hypertension*. 2005;23(1):175-82.
252. Palatini P, Mos L, Ballerini P, Mazzer A, Saladini F, Bortolazzi A, et al. Relationship between GFR and albuminuria in stage 1 hypertension. *Clinical Journal of the American Society of Nephrology*. 2013;8(1):59-66.
253. Palmisano JJ, Lebovitz HE. Renal function in black Americans with type II diabetes. *The Journal of diabetic complications*. 1989;3(1):40-4.
254. Park M, Ko Y, Song SH, Kim S, Yoon HJ. Association of low aerobic fitness with hyperfiltration and albuminuria in men. *Medicine and science in sports and exercise*. 2013;45(2):217-23.
255. Pecis M, Azevedo MJ, Gross JL. Glomerular hyperfiltration is associated with blood pressure abnormalities in normotensive normoalbuminuric IDDM patients. *Diabetes Care*. 1997;20(8):1329-33.
256. Pecis M, De Azevedo MJ, Gross JL. Chicken and fish diet reduces glomerular hyperfiltration in IDDM patients. *Diabetes Care*. 1994;17(7):665-72.
257. Pecly IM, Genelhu V, Francischetti EA. Renal functional reserve in obesity hypertension. *International journal of clinical practice*. 2006;60(10):1198-203.
258. Pedersen MM, Christiansen JS, Mogensen CE. Reduction of glomerular hyperfiltration in normoalbuminuric IDDM patients by 6 mo of aldose reductase inhibition. *Diabetes*. 1991;40(5):527-31.
259. Perelstein EM, Grunfeld BG, Simsolo RB, Gimenez MI, Gianantonio CA. Renal functional reserve compared in haemolytic uraemic syndrome and single kidney. *Archives of Disease in Childhood*. 1990;65(7):728-31.
260. Perkins BA, Sochett EB, Cherney DZ. Ability of Cystatin C to detect changes in glomerular filtration rate after ACE inhibition in patients with uncomplicated type 1 diabetes. *Clinical and experimental hypertension (New York, NY : 1993)*. 2012;34(8):606-11.
261. Pham PC, Pham PM, Pham PT. Patients with diabetes mellitus type 2 and hypomagnesemia may have enhanced glomerular filtration via hypocalcemia. *Clin Nephrol*. 2012;78(6):442-8.
262. Piepsz A, Tondeur M, Ham H. Revisiting normal (51)Cr-ethylenediaminetetraacetic acid clearance values in children. *European journal of nuclear medicine and molecular imaging*. 2006;33(12):1477-82.
263. Pinto-Sietsma SJ, Janssen WM, Hillege HL, Navis G, De Zeeuw D, De Jong PE. Urinary albumin excretion is associated with renal functional abnormalities in a nondiabetic population. *Journal of the American Society of Nephrology : JASN*. 2000;11(10):1882-8.
264. Pistorosch F, Herbrig K, Kindel B, Passauer J, Fischer S, Gross P. Rosiglitazone improves glomerular hyperfiltration, renal endothelial dysfunction, and microalbuminuria of incipient diabetic nephropathy in patients. *Diabetes*. 2005;54(7):2206-11.
265. Ponder SW, Brouhard BH, Travis LB. Hyperphosphaturia and Hypermagnesuria in children with IDDM. *Diabetes Care*. 1990;13(4):437-41.



266. Premaratne E, Macisaac RJ, Tsalamandris C, Panagiotopoulos S, Smith T, Jerums G. Renal hyperfiltration in type 2 diabetes: effect of age-related decline in glomerular filtration rate. *Diabetologia*. 2005;48(12):2486-93.
267. Prestidge C, Chilvers MA, Davidson AG, Cho E, McMahon V, White CT. Renal function in pediatric cystic fibrosis patients in the first decade of life. *Pediatric nephrology (Berlin, Germany)*. 2011;26(4):605-12.
268. Pruijm M, Wuerzner G, Maillard M, Bovet P, Renaud C, Bochud M, et al. Glomerular hyperfiltration and increased proximal sodium reabsorption in subjects with type 2 diabetes or impaired fasting glucose in a population of the African region. *Nephrology Dialysis Transplantation*. 2010;25(7):2225-31.
269. Quinn CT, Johnson VL, Kim HY, Trachtenberg F, Vogiatzi MG, Kwiatkowski JL, et al. Renal dysfunction in patients with thalassaemia. *British journal of haematology*. 2011;153(1):111-7.
270. Raes A, Donckerwolcke R, Craen M, Hussein MC, Vande Walle J. Renal hemodynamic changes and renal functional reserve in children with type I diabetes mellitus. *Pediatric Nephrology*. 2007;22(11):1903-9.
271. Rajic M, Ilic S, Vlajkovic M, Antic S, Velickovic L, Stefanovic V. Radionuclide staging of renal function in type 1 diabetes mellitus. *Renal failure*. 2007;29(6):685-91.
272. Reitsma-Bierens WC, Smit GP, Troelstra JA. Renal function and kidney size in glycogen storage disease type I. *Pediatric nephrology (Berlin, Germany)*. 1992;6(3):236-8.
273. Ribstein J, Du Cailar G, Fesler P, Mimran A. Relative glomerular hyperfiltration in primary aldosteronism. *Journal of the American Society of Nephrology*. 2005;16(5):1320-5.
274. Ribstein J, du Cailar G, Mimran A. Combined renal effects of overweight and hypertension. *Hypertension*. 1995;26(4):610-5.
275. Rigalleau V, Raffaitin C, Perlemoine C, Gin H, Lasseur C, Chauveau P, et al. Higher hemoglobin levels in diabetic subjects with renal hyperfiltration. *American journal of kidney diseases : the official journal of the National Kidney Foundation*. 2007;49(2):346.
276. Rius F, Pizaro E, Salinas I, Lucas A, Sanmarti A, Romero R. Age as a determinant of glomerular filtration rate in non-insulin-dependent diabetes mellitus. *Nephrology, dialysis, transplantation : official publication of the European Dialysis and Transplant Association - European Renal Association*. 1995;10(9):1644-7.
277. Rodriguez-Iturbe B, Herrera J, Garcia R. Relationship between glomerular filtration rate and renal blood flow at different levels of protein-induced hyperfiltration in man. *Clinical science (London, England : 1979)*. 1988;74(1):11-5.
278. Roels H, Lauwerys R, Konings J, Buchet JP, Bernard A, Green S, et al. Renal function and hyperfiltration capacity in lead smelter workers with high bone lead. *Occupational and environmental medicine*. 1994;51(8):505-12.
279. Rota R, Timsit J, Hannedouche T, Ikeni A, Boitard C, Guicheney P. Erythrocyte Na<sup>+</sup>/Li<sup>+</sup> countertransport and glomerular hyperfiltration in insulin-dependent diabetics. *American journal of hypertension*. 1993;6(6 Pt 1):534-7.
280. Rudberg S, Osterby R. Decreasing glomerular filtration rate--an indicator of more advanced diabetic glomerulopathy in the early course of microalbuminuria in IDDM adolescents? *Nephrology, dialysis, transplantation : official publication of the European Dialysis and Transplant Association - European Renal Association*. 1997;12(6):1149-54.
281. Ruggenenti P, Flores C, Aros C, Ene-Iordache B, Trevisan R, Ottomano C, et al. Renal and metabolic effects of insulin lispro in type 2 diabetic subjects with overt nephropathy. *Diabetes Care*. 2003;26(2):502-9.
282. Ruggenenti P, Porrini EL, Gaspari F, Motterlini N, Cannata A, Carrara F, et al. Glomerular hyperfiltration and renal disease progression in type 2 diabetes. *Diabetes Care*. 2012;35(10):2061-8.
283. Sackmann H, Tran-Van T, Tack I, Hanaire-Broutin H, Tauber JP, Ader JL. Renal functional reserve in IDDM patients. *Diabetologia*. 1998;41(1):86-93.

284. Sackmann H, Tran-Van T, Tack I, Hanaire-Broutin H, Tauber JP, Ader JL. Contrasting renal functional reserve in very long-term Type I diabetic patients with and without nephropathy. *Diabetologia*. 2000;43(2):227-30.
285. Sauriasari R, Sakano N, Wang DH, Takaki J, Takemoto K, Wang B, et al. C-reactive protein is associated with cigarette smoking-induced hyperfiltration and proteinuria in an apparently healthy population. *Hypertension research : official journal of the Japanese Society of Hypertension*. 2010;33(11):1129-36.
286. Sawicki PT, Heinemann L, Rave K, Hohmann A, Berger M. Atrial natriuretic factor in various stages of diabetic nephropathy. *The Journal of diabetic complications*. 1988;2(4):207-9.
287. Schell M, Lachaux A, Hadj-Aissa A, Dubourg L, Mahmoud A, Boillot O, et al. Fading renal hyperfiltration in children following liver transplantation. *Pediatric transplantation*. 2001;5(1):51-5.
288. Schlaich MP, Schmitt D, Ott C, Schmidt BM, Schmieder RE. Basal nitric oxide synthase activity is a major determinant of glomerular haemodynamics in humans. *J Hypertens*. 2008;26(1):110-6.
289. Schmieder RE, Messerli FH, Garavaglia G, Nunez B. Glomerular hyperfiltration indicates early target organ damage in essential hypertension. *Journal of the American Medical Association*. 1990;264(21):2775-80.
290. Schmieder RE, Veelken P, Gatzka CD, Ruddel H, Schachinger H. Predictors for hypertensive nephropathy: Results of a 6-year follow-up study in essential hypertension. *Journal of Hypertension*. 1995;13(3):357-65.
291. Schmieder RE, Veelken R, Schobel H, Dominiak P, Mann JF, Luft FC. Glomerular hyperfiltration during sympathetic nervous system activation in early essential hypertension. *Journal of the American Society of Nephrology : JASN*. 1997;8(6):893-900.
292. Schmitt F, Martinez F, Brillet G, Giatras I, Choukroun G, Girot R, et al. Early glomerular dysfunction in patients with sickle cell anemia. *American journal of kidney diseases : the official journal of the National Kidney Foundation*. 1998;32(2):208-14.
293. Schmitz A, Christensen T, Taagehoj Jensen F. Glomerular filtration rate and kidney volume in normoalbuminuric non-insulin-dependent diabetics--lack of glomerular hyperfiltration and renal hypertrophy in uncomplicated NIDDM. *Scandinavian journal of clinical and laboratory investigation*. 1989;49(2):103-8.
294. Schou M, Gustafsson F, Kistorp CN, Corell P, Kjaer A, Hildebrandt PR. Effects of body mass index and age on N-terminal pro brain natriuretic peptide are associated with glomerular filtration rate in chronic heart failure patients. *Clinical chemistry*. 2007;53(11):1928-35.
295. Sebekova K, Somoza V, Jarcuskova M, Heidland A, Podracka L. Plasma advanced glycation end products are decreased in obese children compared with lean controls. *International journal of pediatric obesity : IJPO : an official journal of the International Association for the Study of Obesity*. 2009;4(2):112-8.
296. Sechi LA, Di Fabio A, Bazzocchi M, Uzzau A, Catena C. Intrarenal hemodynamics in primary aldosteronism before and after treatment. *The Journal of clinical endocrinology and metabolism*. 2009;94(4):1191-7.
297. Selistre L, de Souza V, Ranchin B, Hadj-Aissa A, Cochat P, Dubourg L. Early renal abnormalities in children with postnatally diagnosed autosomal dominant polycystic kidney disease. *Pediatric nephrology (Berlin, Germany)*. 2012;27(9):1589-93.
298. Sellers EA, Blydt-Hansen TD, Dean HJ, Gibson IW, Birk PE, Ogborn M. Macroalbuminuria and renal pathology in First Nation youth with type 2 diabetes. *Diabetes Care*. 2009;32(5):786-90.
299. Serri O, Beaugard H, Brazeau P, Aribat T, Lambert J, Harris A, et al. Somatostatin analogue, octreotide, reduces increased glomerular filtration rate and kidney size in insulin-dependent diabetes. *Journal of the American Medical Association*. 1991;265(7):888-92.
300. Signorini AM, Tanganelli I, Fondelli C, Vattimo A, Ferrari F, Borgogni P, et al. Glomerular filtration and renal volume in type II diabetes (non-insulin-dependent): study in normal and microalbuminuria patients. *Bollettino della Societa italiana di biologia sperimentale*. 1991;67(8):767-72.
301. Silva Junior GB, Liborio AB, Vieira AP, Bem AX, Lopes Filho AS, Figueiredo Filho AC, et al. Evaluation of renal function in sickle cell disease patients in Brazil. *Brazilian journal of medical and biological*

- research = Revista brasileira de pesquisas medicas e biologicas / Sociedade Brasileira de Biofisica [et al]. 2012;45(7):652-5.
302. Silveiro SP, Friedman R, Gross JL. Glomerular hyperfiltration in NIDDM patients without overt proteinuria. *Diabetes Care*. 1993;16(1):115-9.
303. Simmons D. Diabetic nephropathy in New Zealand Maori and Pacific Islands people. *Nephrology*. 1998;4(SUPPL.):S72-S5.
304. Simon AH, Lima PR, Almerinda M, Alves VF, Bottini PV, de Faria JB. Renal haemodynamic responses to a chicken or beef meal in normal individuals. *Nephrology, dialysis, transplantation : official publication of the European Dialysis and Transplant Association - European Renal Association*. 1998;13(9):2261-4.
305. Smoyer WE, Brouhard BH, Rassin DK, LaGrone L. Enhanced GFR response to oral versus intravenous arginine administration in normal adults. *The Journal of laboratory and clinical medicine*. 1991;118(2):166-75.
306. Sochett EB, Cherney DZ, Curtis JR, Dekker MG, Scholey JW, Miller JA. Impact of renin angiotensin system modulation on the hyperfiltration state in type 1 diabetes. *Journal of the American Society of Nephrology : JASN*. 2006;17(6):1703-9.
307. Soldo D, Brkljacic B, Bozikov V, Drinkovic I, Hauser M. Diabetic nephropathy. Comparison of conventional and duplex Doppler ultrasonographic findings. *Acta radiologica (Stockholm, Sweden : 1987)*. 1997;38(2):296-302.
308. Solerte SB, Rondanelli M, Giacchero R, Stabile M, Lovati E, Cravello L, et al. Serum glucagon concentration and hyperinsulinaemia influence renal haemodynamics and urinary protein loss in normotensive patients with central obesity. *International Journal of Obesity*. 1999;23(9):997-1003.
309. Soper CP, Barron JL, Hyer SL. Long-term glycaemic control directly correlates with glomerular filtration rate in early Type 1 diabetes mellitus before the onset of microalbuminuria. *Diabetic medicine : a journal of the British Diabetic Association*. 1998;15(12):1010-4.
310. Stephenson TJ, Setchell KD, Kendall CW, Jenkins DJ, Anderson JW, Fanti P. Effect of soy protein-rich diet on renal function in young adults with insulin-dependent diabetes mellitus. *Clin Nephrol*. 2005;64(1):1-11.
311. Sterner NG, Nilsson H, Rosen U, Lilja B, Sundkvist G. Relationships among glomerular filtration rate, albuminuria, and autonomic nerve function in insulin-dependent and non-insulin-dependent diabetes mellitus. *Journal of diabetes and its complications*. 1997;11(3):188-93.
312. Strzelecka-Lichota A. Renal function in subjects with minimal change steroid-responsive nephrotic syndrome in childhood. *Annales Academiae Medicae Stetinensis*. 2004;50(2):41-9.
313. Stuveling EM, Hillege HL, Bakker SJ, Gans RO, De Jong PE, De Zeeuw D. C-reactive protein is associated with renal function abnormalities in a non-diabetic population. *Kidney Int*. 2003;63(2):654-61.
314. Taniwaki H, Ishimura E, Emoto M, Kawagishi T, Matsumoto N, Shoji T, et al. Relationship between urinary albumin excretion and glomerular filtration rate in normotensive, nonproteinuric patients with type 2 diabetes mellitus. *Nephron*. 2000;86(1):36-43.
315. Ter Wee PM, Tegzess AM, Donker AJM. Renal reserve filtration capacity before and after kidney donation. *Journal of internal medicine*. 1990;228(4):393-9.
316. ter Wee PM, van Ballegooie E, Rosman JB, Meijer S, Donker AJ. Renal reserve filtration capacity in patients with type 1 (insulin-dependent) diabetes mellitus. *Nephrology, dialysis, transplantation : official publication of the European Dialysis and Transplant Association - European Renal Association*. 1987;2(6):504-9.
317. Thomas DM, Coles GA, Williams JD. Dopamine does not mediate protein-induced hyperfiltration. *Experimental nephrology*. 1994;2(5):294-8.

318. Thomas MC, Tsalamandris C, MacIsaac R, Medley T, Kingwell B, Cooper ME, et al. Low-molecular-weight AGEs are associated with GFR and anemia in patients with type 2 diabetes. *Kidney Int.* 2004;66(3):1167-72.
319. Thrailkill KM, Bunn RC, Moreau CS, Cockrell GE, Simpson PM, Coleman HN, et al. Matrix metalloproteinase-2 dysregulation in type 1 diabetes. *Diabetes Care.* 2007;30(9):2321-6.
320. Tiengo A, Briani G, Scaldaferrri E, Riva F, Jori E, Sgnaolin E, et al. Renal hemodynamics and albumin excretion rate in patients with diabetes secondary to acquired pancreatic disease. *Diabetes Care.* 1992;15(11):1591-7.
321. Tietze IN, Sorensen SS, Ivarsen PR, Nielsen CB, Pedersen EB. Impaired renal haemodynamic response to amino acid infusion in essential hypertension during angiotensin converting enzyme inhibitor treatment. *J Hypertens.* 1997;15(5):551-60.
322. Tomaszewski M, Charchar FJ, Maric C, McClure J, Crawford L, Grzeszczak W, et al. Glomerular hyperfiltration: A new marker of metabolic risk. *Kidney International.* 2007;71(8):816-21.
323. Tonshoff B, Nowack R, Kurilenko S, Blum WF, Seyberth HW, Mehls O, et al. Growth hormone-induced glomerular hyperfiltration is dependent on vasodilating prostanoids. *American Journal of Kidney Diseases.* 1993;21(2):145-51.
324. Torbjomsdotter TB, Jaremko GA, Berg UB. Nondipping and its relation to glomerulopathy and hyperfiltration in adolescents with type 1 diabetes. *Diabetes Care.* 2004;27(2):510-6.
325. Tsai YW, Ho CI, Chen JY, Chang KC, Weng YM, Chen SY, et al. Impact of body composition on estimated glomerular filtration rate in relatively healthy adults in Taiwan. *European journal of clinical nutrition.* 2014.
326. Tuttle KR, Bruton JL. Effect of insulin therapy on renal hemodynamic response to amino acids and renal hypertrophy in non-insulin-dependent diabetes. *Kidney International.* 1992;42(1):167-73.
327. Tuttle KR, Puhlman ME, Cooney SK, Short RA. Effects of amino acids and glucagon on renal hemodynamics in type 1 diabetes. *American Journal of Physiology - Renal Physiology.* 2002;282(1 51-1):F103-F12.
328. Uemasu J, Hori T, Uemasu Y, Kawasaki H. Effects of a rice meal on renal hemodynamics and excretory functions in normal subjects. *Nephron.* 1991;57(2):187-91.
329. Uemasu J, Maeda N, Suyama A, Kawasaki H, Hirayama C. Lack of effect of indomethacin and captopril on protein-induced glomerular hyperfiltration in normal subjects. *Japanese Journal of Nephrology.* 1989;31(2):179-83.
330. Unuigbo EI, Azubike CO, Eregie A. Assessment for markers of nephropathy in newly diagnosed type 2 diabetics. *West African journal of medicine.* 2005;24(2):134-8.
331. Valensi P, Assayag M, Busby M, Paries J, Lormeau B, Attali JR. Microalbuminuria in obese patients with or without hypertension. *International Journal of Obesity.* 1996;20(6):574-9.
332. Vanrenterghem Ch YF, Verberckmoes RKA, Roels LM, Michielsen PJ. Role of prostaglandins in protein-induced glomerular hyperfiltration in normal humans. *American Journal of Physiology - Renal Fluid and Electrolyte Physiology.* 1988;254(4):23/4.
333. Vasavda N, Gutierrez L, House MJ, Drasar E, St Pierre TG, Thein SL. Renal iron load in sickle cell disease is influenced by severity of haemolysis. *British journal of haematology.* 2012;157(5):599-605.
334. Vasovic O, Zamaklar M, Lalic K, Milosevic D, Zikic L, Popovic L, et al. [Relationship between low glomerular filtration rate, hypertension, and microalbuminuria in type 1 diabetes mellitus]. *Vojnosanitetski pregled Military-medical and pharmaceutical review.* 2005;62(5):349-55.
335. Vedder AC, Linthorst GE, van Breemen MJ, Groener JE, Bemelman FJ, Strijland A, et al. The Dutch Fabry cohort: diversity of clinical manifestations and Gb3 levels. *Journal of inherited metabolic disease.* 2007;30(1):68-78.
336. Vedel P, Obel J, Nielsen FS, Bang LE, Svendsen TL, Pedersen OB, et al. Glomerular hyperfiltration in microalbuminuric NIDDM patients. *Diabetologia.* 1996;39(12):1584-9.

337. Veldman BA, Vervoort G, Blom H, Smits P. Reduced plasma total homocysteine concentrations in Type 1 diabetes mellitus is determined by increased renal clearance. *Diabetic medicine : a journal of the British Diabetic Association*. 2005;22(3):301-5.
338. Vervoort G, Veldman B, Berden JH, Smits P, Wetzels JF. Glomerular hyperfiltration in type 1 diabetes mellitus results from primary changes in proximal tubular sodium handling without changes in volume expansion. *European journal of clinical investigation*. 2005;35(5):330-6.
339. Viberti GC, Benigni A, Boggetti E, Remuzzi G, Wiseman MJ. Glomerular hyperfiltration and urinary prostaglandins in Type 1 diabetes mellitus. *Diabetic Medicine*. 1989;6(3):219-23.
340. Ware RE, Rees RC, Sarnaik SA, Iyer RV, Alvarez OA, Casella JF, et al. Renal Function in Infants with Sick Cell Anemia: Baseline Data from the BABY HUG Trial. *Journal of Pediatrics*. 2010;156(1):66-70.e1.
341. Weaver VM, Kim NS, Jaar BG, Schwartz BS, Parsons PJ, Steuerwald AJ, et al. Associations of low-level urine cadmium with kidney function in lead workers. *Occupational & Environmental Medicine*. 2011;68(4):250-6.
342. Weaver VM, Lee B, Ahn K, Lee G, Todd AC, Stewart WF, et al. Associations of lead biomarkers with renal function in Korean lead workers. *Occupational & Environmental Medicine*. 2003;60(8):551-62.
343. Widstam-Attorps U, Berg U. Urinary protein excretion and renal function in young people with diabetes mellitus. *Nephrology, dialysis, transplantation : official publication of the European Dialysis and Transplant Association - European Renal Association*. 1992;7(6):487-92.
344. Wiesmayr S, Jungraithmayr TC, Ellemunter H, Stelzmueller I, Bonatti H, Margreiter R, et al. Long-term glomerular filtration rate following pediatric liver transplantation. *Pediatric transplantation*. 2005;9(5):604-11.
345. Wigfall DR, Ware RE, Burchinal MR, Kinney TR, Foreman JW. Prevalence and clinical correlates of glomerulopathy in children with sickle cell disease. *Journal of Pediatrics*. 2000;136(6):749-53.
346. Williams RM, Yuen K, White D, Mallard B, Dalton RN, Acerini CL, et al. Short-term suppression of elevated growth hormone concentrations following insulin-like growth factor 1 administration in young adults with type 1 diabetes does not alter glomerular filtration or albumin excretion rates. *Clinical endocrinology*. 2006;65(4):439-45.
347. Wirta O, Pasternack A, Laippala P, Turjanmaa V. Glomerular filtration rate and kidney size after six years disease duration in non-insulin-dependent diabetic subjects. *Clin Nephrol*. 1996;45(1):10-7.
348. Wiseman MJ, Hunt R, Goodwin A. Dietary composition and renal function in healthy subjects. *Nephron*. 1987;46(1):37-42.
349. Wiseman MJ, Mangili R, Alberetto M, Keen H, Viberti G. Glomerular response mechanisms to glycemic changes in insulin-dependent diabetics. *Kidney Int*. 1987;31(4):1012-8.
350. Wiseman MJ, Redmond S, House F. The glomerular hyperfiltration of diabetes is not associated with elevated plasma levels of glucagon and growth hormone. *Diabetologia*. 1985;28(10):718-21.
351. Wiseman MJ, Viberti GC, Keen H. Threshold effect of plasma glucose in the glomerular hyperfiltration of diabetes. *Nephron*. 1984;38(4):257-60.
352. Wolfsdorf JI, Crigler JF, Jr. Effect of continuous glucose therapy begun in infancy on the long-term clinical course of patients with type I glycogen storage disease. *Journal of pediatric gastroenterology and nutrition*. 1999;29(2):136-43.
353. Wollesen F, Brattstrom L, Refsum H, Ueland PM, Berglund L, Berne C. Plasma total homocysteine and cysteine in relation to glomerular filtration rate in diabetes mellitus. *Kidney Int*. 1999;55(3):1028-35.
354. Wong F, Logan A, Blendis L. Hyperinsulinemia in preascitic cirrhosis: Effects on systemic and renal hemodynamics, sodium homeostasis, forearm blood flow, and sympathetic nervous activity. *Hepatology (Baltimore, Md)*. 1996;23(3):414-22.
355. Wong F, Massie D, Colman J, Dudley F. Glomerular hyperfiltration in patients with well-compensated alcoholic cirrhosis. *Gastroenterology*. 1993;104(3):884-9.

356. Wong F, Massie D, Hsu P, Dudley F. Indomethacin-induced renal dysfunction in patients with well-compensated cirrhosis. *Gastroenterology*. 1993;104(3):869-76.
357. Wong H, Vivian L, Weiler G, Filler G. Patients with autosomal dominant polycystic kidney disease hyperfiltrate early in their disease. *American Journal of Kidney Diseases*. 2004;43(4):624-8.
358. Wu VC, Kuo CC, Wang SM, Liu KL, Huang KH, Lin YH, et al. Primary aldosteronism: changes in cystatin C-based kidney filtration, proteinuria, and renal duplex indices with treatment. *Journal of Hypertension*. 2011;29(9):1778-86.
359. Wu VC, Yang SY, Lin JW, Cheng BW, Kuo CC, Tsai CT, et al. Kidney impairment in primary aldosteronism. *Clinica Chimica Acta*. 2011.
360. Wuerzner G, Pruijm M, Maillard M, Bovet P, Renaud C, Burnier M, et al. Marked association between obesity and glomerular hyperfiltration: A cross-sectional study in an African population. *American Journal of Kidney Diseases*. 2010;56(2):303-12.
361. Yamada K, Nakano H, Nakayama M, Nozaki O, Miura Y, Nishimura M, et al. Endothelium-dependent relaxation in peripheral vasculature and kidney of non-insulin-dependent diabetes mellitus. *Journal of diabetes and its complications*. 1995;9(4):203-7.
362. Yang GK, Maahs DM, Perkins BA, Cherney DZ. Renal hyperfiltration and systemic blood pressure in patients with uncomplicated type 1 diabetes mellitus. *PloS one*. 2013;8(7):e68908.
363. Yip JW, Jones SL, Wiseman MJ, Hill C, Viberti G. Glomerular hyperfiltration in the prediction of nephropathy in IDDM: A 10-year follow-up study. *Diabetes*. 1996;45(12):1729-33.
364. Zerbini G, Bonfanti R, Meschi F, Bognetti E, Paesano PL, Gianolli L, et al. Persistent renal hypertrophy and faster decline of glomerular filtration rate precede the development of microalbuminuria in type 1 diabetes. *Diabetes*. 2006;55(9):2620-5.
365. Ziyadeh FN, Musallam KM, Mallat NS, Mallat S, Jaber F, Mohamed AA, et al. Glomerular hyperfiltration and proteinuria in transfusion-independent patients with beta-thalassemia intermedia. *Nephron Clinical practice*. 2012;121(3-4):c136-43.
366. Zoccali C, Mallamaci F, Postorino M, Cuzzola F, Leonardis D, Parlongo S, et al. Hyperfiltration and calcium metabolism in essential hypertension. *American journal of hypertension*. 1991;4(12 Pt 1):944-50.
367. Zuccala A, Gaggi R, Zucchelli A, Zucchelli P. Renal functional reserve in patients with a reduced number of functioning glomeruli. *Clin Nephrol*. 1989;32(5):229-34.

**Hand-searched papers, included:**

368. Cherney DZ1, Reich HN, Miller JA, Lai V, Zinman B, Dekker MG, Bradley TJ, Scholey JW, Sochett EB. Age is a determinant of acute hemodynamic responses to hyperglycemia and angiotensin II in humans with uncomplicated type 1 diabetes mellitus. *Am J Physiol Regul Integr Comp Physiol*. 2010;299:R206-14.
369. Barai S, Gambhir S, Prasad N, Sharma RK, Ora M, Kumar A, Gupta A, Parasar DS, Suneetha B. Levels of GFR and protein-induced hyperfiltration in kidney donors: a single-center experience in India. *Am J Kidney Dis* 2008;51:407-14.
370. Claris-Appiani A, Ardissino G, Tirelli AS, Daccò V, Corbetta C, Guidi L, Moretto E, Assael BM, Sereni F. Metabolic factors in the renal response to amino acid infusion. *Am J Nephrol* 1998;18:359-66.
371. Fliser D1, Zeier M, Nowack R, Ritz E. Renal functional reserve in healthy elderly subjects. *J Am Soc Nephrol* 1993;3:1371-7.
372. Greene SA1, Dalton RN, Turner C, Haycock GB, Chantler C. Hyperglycemia with and without glycosuria: effect on inulin and para-amino hippurate clearance. *Kidney Int* 1987;32:896-9.
373. Lemley KV, Boothroyd DB, Blouch KL, Nelson RG, Jones LI, Olshen RA, Myers BD. Modeling GFR trajectories in diabetic nephropathy. *Am J Physiol Renal Physiol*. 2005;289:F863-70.

374. McPherson Yee M, Jabbar SF, Osunkwo I, Clement L, Lane PA, Eckman JR, Guasch A. Chronic kidney disease and albuminuria in children with sickle cell disease. *Clin J Am Soc Nephrol*. 2011;6:2628-33.
375. Regolisti G, Buzio C, Cavatorta A, De Martin L, Cavalli R, Perazzoli F, Coghi P, Cabassi A, Pucci F, Borghetti A. Glomerular hyperfiltration in essential hypertension: hormonal aspects. *Acta Biomed Ateneo Parmense*. 1992;63:163-73.
376. Rodríguez-Iturbe B, Herrera J, García R. Response to acute protein load in kidney donors and in apparently normal postacute glomerulonephritis patients: evidence for glomerular hyperfiltration. *Lancet*. 1985;2(8453):461-4.
377. Semplicini A, Ceolotto G, Sartori M, Maresca A, Baritono E, De Toni R, Paparella I, Calò L. Regulation of glomerular filtration in essential hypertension: role of abnormal Na<sup>+</sup> transport and atrial natriuretic peptide. *J Nephrol*. 2002;15(5):489-96.
378. Vora JP, Dolben J, Dean JD, Thomas D, Williams JD, Owens DR, Peters JR. Renal hemodynamics in newly presenting non-insulin dependent diabetes mellitus. *Kidney Int*. 1992;41:829-35.
379. Woitas RP, Heller J, Stoffel-Wagner B, Spengler U, Sauerbruch T. Renal functional reserve and nitric oxide in patients with compensated liver cirrhosis. *Hepatology* 1997;26:858-64.
380. Caramori ML, Fioretto P, Mauer M. Low glomerular filtration rate in normoalbuminuric type 1 diabetic patients: an indicator of more advanced glomerular lesions. *Diabetes*. 2003;52:1036-40.
381. Chagnac A, Weinstein T, Korzets A, Ramadan E, Hirsch J, Gafter U. Glomerular hemodynamics in severe obesity. *Am J Physiol Renal Physiol*. 2000;278:F817-22.
382. Schmitz A, Hansen HH, Christensen T. Kidney function in newly diagnosed type 2 (non-insulin-dependent) diabetic patients, before and during treatment. *Diabetologia*. 1989;32:434-9.
383. Mogensen CE, Andersen MJ. Increased kidney size and glomerular filtration rate in early juvenile diabetes. *Diabetes*. 1973;22:706-12.
384. Schmitz A, Christensen T, Møller A, Mogensen CE. Kidney function and cardiovascular risk factors in non-insulin-dependent diabetics (NIDDM) with microalbuminuria. *J Intern Med*. 1990;228(4):347-52.
385. Nakamura H, Yamazaki M, Chiba Y, Tani N, Momotsu T, Kamo K, Ito S, Yamaji T, Shibata A. Acute loading with proteins from different sources in healthy volunteers and diabetic patients. *J Diabet Complications*. 1991;5(2-3):140-2.
386. Hoang K, Tan JC, Derby G, Blouch KL, Masek M, Ma I, Lemley KV, Myers BD. Determinants of glomerular hypofiltration in aging humans. *Kidney Int*. 2003;64:1417-24.
387. Navarro-Díaz M, Serra A, Romero R, Bonet J, Bayés B, Homs M, Pérez N, Bonal J. Effect of drastic weight loss after bariatric surgery on renal parameters in extremely obese patients: long-term follow-up. *J Am Soc Nephrol*. 2006;17(12 Suppl 3):S213-7.
388. Thompson J, Reid M, Hambleton I, Serjeant GR. Albuminuria and renal function in homozygous sickle cell disease: observations from a cohort study. *Arch Intern Med*. 2007;167:701-8.
389. Woo KT, Lau YK, Chan CM, Wong KS. ATRA therapy restores normal renal function and renal reserve and prevents renal failure. *Ann Acad Med Singapore* 2005;34:52-9.
390. Bierens WC, Smit GP, Troelstra JA. Renal function and kidney size in glycogen storage disease type I. *Pediatr Nephrol* 1992;6:236-8.
391. Lafayette RA, Druzin M, Sibley R, Derby G, Malik T, Huie P, Polhemus C, Deen WM, Myers BD. Nature of glomerular dysfunction in pre-eclampsia. *Kidney Int* 1998;54(4):1240-9.
392. Drummond K, Mauer M; International Diabetic Nephropathy Study Group. The early natural history of nephropathy in type 1 diabetes: II. Early renal structural changes in type 1 diabetes. *Diabetes*. 2002 May;51(5):1580-7.
393. Lemley KV, Abdullah I, Myers BD, Meyer TW, Blouch K, Smith WE, Bennett PH, Nelson RG. Evolution of incipient nephropathy in type 2 diabetes mellitus. *Kidney Int*. 2000;58(3):1228-37. Erratum in: *Kidney Int* 2000 Nov;58(5):2257.

394. Steinke JM et al. The early natural history of nephropathy in type 1 diabetes. III. Predictors of 5-year urinary albumin excretion rate patterns in initially normoalbuminuric patients. *Diabetes* 2005;54:2164-2171
395. Okada R et al. Renal hyperfiltration in prediabetes confirmed by fasting plasma glucose and haemoglobin A1c. *Renal Failure* 2012;34:1084-1090
396. Caramori ML, Gross JL, Pecis M, de Azevedo MJ. Glomerular filtration rate, urinary albumin excretion rate, and blood pressure changes in normoalbuminuric normotensive type 1 diabetic patients: an 8-year follow-up study. *Diabetes Care* 1999;22:1512-6
397. Bjornstad P, Maahs DM, Cherney DZ, Cree-Green M, West A, Pyle L, Nadeau KJ. Insulin sensitivity is an important determinant of renal health in adolescents with type 2 diabetes. *Diabetes Care* 2014 Nov;37:3033-9
398. Yang GK, Har RL, Lytvyn Y, Yip P, Cherney DZ. Renal hyperfiltration is associated with glucose-dependent changes in fractional excretion of sodium in patients with uncomplicated type 1 diabetes. *Diabetes Care* 2014;37:2774-81
399. Azevedo MJ1, Padilha LM, Gross JL. A short-term low-protein diet reduces glomerular filtration rate in insulin-dependent diabetes mellitus patients. *Braz J Med Biol Res* 1990;23:647-54400. Silveiro SP1, Friedman R, de Azevedo MJ, Canani LH, Gross JL. Five-year prospective study of glomerular filtration rate and albumin excretion rate in normofiltering and hyperfiltering normoalbuminuric NIDDM patients. *Diabetes Care* 1996;19(2):171-4
401. Cherney DZ, Scholey JW, Zhou J, Zimpelmann J, Kennedy C, Burns KD, Lai V, Miller JA. Endothelial nitric oxide synthase gene polymorphisms and the renal hemodynamic response to L-arginine. *Kidney Int* 2009;75:327-32
402. Cherney DZ, Lai V, Miller JA, Scholey JW, Reich HN. The angiotensin II receptor type 2 polymorphism influences haemodynamic function and circulating RAS mediators in normotensive humans. *Nephrol Dial Transplant* 2010;25:4093-6
403. Cherney DZ1, Reich HN, Scholey JW, Daneman D, Mahmud FH, Har RL, Sochett EB. The effect of aliskiren on urinary cytokine/chemokine responses to clamped hyperglycaemia in type 1 diabetes. *Diabetologia* 2013;56:2308-17
404. Cherney DZ1, Scholey JW, Sochett EB. Sex differences in renal responses to hyperglycemia, L-arginine, and L-NMMA in humans with uncomplicated type 1 diabetes. Sex differences in renal responses to hyperglycemia, L-arginine, and L-NMMA in humans with uncomplicated type 1 diabetes. *Diabetes Care* 2013;36:1290-6
405. Cherney DZ1, Montanari A. Gender, clamped hyperglycemia and arterial stiffness in patients with uncomplicated type 1 diabetes mellitus. *Clin Exp Hypertens* 2014;36:187-93
